# Supplementary material for: Palladium-catalyzed regioselective hydroboration of aryl alkenes with B2pin2
Source: Royal Society of Chemistry journal article supplement (doi:10.1039/c7cc09432a), 2018-01-01

# Supporting Information

## Palladium-Catalyzed Regioselective Hydroboration of Aryl Alkenes with $B_2pin_2$

Jiuzhong Huang, Wuxin Yan, Chaowei Tan, Wanqing Wu\*, Huanfeng Jiang\*

Key Laboratory of Functional Molecular Engineering of Guangdong Province, School of Chemistry and Chemical Engineering, South China University of Technology, Guangzhou 510640, P. R. China

Fax: (+86) 20-8711-2906; E-mail: cewuwq@scut.edu.cn, jianghf@scut.edu.cn

### Table of Contents

|           |                                                     |            |
|-----------|-----------------------------------------------------|------------|
| <b>A.</b> | <b>General Information.....</b>                     | <b>S2</b>  |
| <b>B.</b> | <b>Optimization of Reaction Conditions.....</b>     | <b>S2</b>  |
| <b>C.</b> | <b>Characterization Data for All Products .....</b> | <b>S3</b>  |
| <b>D.</b> | <b>References.....</b>                              | <b>S13</b> |
| <b>E.</b> | <b>NMR Spectra for All Compounds.....</b>           | <b>S15</b> |

## A. General Information

$^1\text{H}$  and  $^{13}\text{C}$  NMR spectra were recorded on BRUKER DRX-400 spectrometer using  $\text{CDCl}_3$  as solvent and TMS as an internal standard. The chemical shifts are referenced to signals at 7.26 and 77.0 ppm, respectively. Multiplicity was indicated as follows: s (singlet), d (doublet), t (triplet), q (quartet), m (multiplet), td (triplet of doublets), dt (doublet of triplets), ddd (doublet of doublet of doublets). The data of HRMS was carried out on a high-resolution mass spectrometer (LCMS-IT-TOF). IR spectra were obtained either as potassium bromide pellets or as liquid films between two potassium bromide pellets with a BRUKER TENSOR 27 spectrometer. Melting points were determined with Büchi Melting Point B-545 instrument. TLC was performed by using commercially prepared 100-400 mesh silica gel plates and visualization was effected at 254 nm. Unless otherwise stated, all reagents and solvents were purchased from commercial suppliers and used without further purification.

## B. Optimization of Reaction Conditions

In a 20 mL sealed tube,  $\text{Pd}(\text{OAc})_2$  (0.0225 mmol), **L1** (0.0225 mmol),  $\text{B}_2\text{pin}_2$  (0.45 mmol), solvent (1.5 mL), **1b** (0.30 mmol) were successively added and vigorously stirred together at 90 °C for 24 h under  $\text{N}_2$  atmosphere. After the reaction was finished, the mixture was cooled to room temperature. The reaction was neutralized with saturated  $\text{NaHCO}_3$  aq. and extracted with EtOAc ( $3 \times 15$  mL). The combined ethyl acetate layer was washed with brine (10 mL) and dried over anhydrous  $\text{Na}_2\text{SO}_4$ . The solvent was removed under vacuum. The crude product was purified by flash column chromatography (eluting with petroleum ether/ethyl acetate), and calculated the isolated yield.

**Table S1. Screening of solvents and palladium catalysts<sup>a</sup>**

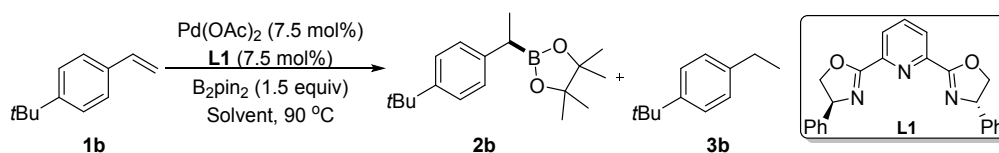

| entry | solvent (mL)                       | conversion (%) | <b>2b</b> yield (%) | <b>3b</b> yield (%) |
|-------|------------------------------------|----------------|---------------------|---------------------|
| 1     | AcOH (0.5), THF                    | 90             | 67                  | 20                  |
| 2     | AcOH (0.5),                        | 88             | 81                  | 4                   |
| 3     | AcOH (0.5), $\text{CH}_3\text{CN}$ | 95             | 93 (90)             | N.D.                |
| 4     | AcOH (0.5), toluene                | 45             | 31                  | N.D.                |
| 5     | AcOH (0.5), DMSO                   | 11             | trace               | N.D.                |
| 6     | AcOH (0.5), <i>i</i> PrOH          | 56             | 10                  | 34                  |
| 7     | <i>i</i> PrOH (1.5)                | 0              | N.D.                | N.D.                |
| 8     | <i>i</i> PrOH (0.5), toluene       | 22             | trace               | 11                  |

Conditions: substrate **1b** (0.3 mmol),  $\text{Pd}(\text{OAc})_2$  (7.5 mol %), **L1** (7.5 mol %),  $\text{B}_2\text{pin}_2$  (1.5 equiv), solvent (1.5 mL) under  $\text{N}_2$  atmosphere at 90 °C for 24 h; Yields determined by GC-MS with *n*-dodecane as internal standard.

## C. Characterization Data for All Products

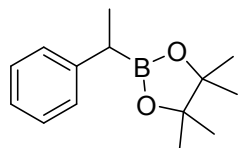

### 4,4,5,5-Tetramethyl-2-(1-phenylethyl)-1,3,2-dioxaborolane (2a)<sup>1</sup>

Colorless oil (59.8 mg, 86%).

<sup>1</sup>H NMR (400 MHz, CDCl<sub>3</sub>) δ 7.29 – 7.18 (m, 4H), 7.16 – 7.07 (m, 1H), 2.43 (q, *J* = 7.3 Hz, 1H), 1.33 (d, *J* = 7.5 Hz, 3H), 1.20 (d, *J* = 5.3 Hz, 12H). <sup>13</sup>C NMR (101 MHz, CDCl<sub>3</sub>) δ 145.0, 128.3, 127.8, 125.1, 83.3, 24.7, 24.6, 17.1. <sup>11</sup>B NMR (128 MHz, CDCl<sub>3</sub>) δ 34.06.

HRMS-ESI (*m/z*): calcd for C<sub>14</sub>H<sub>21</sub>BO<sub>2</sub>, [M+Na]<sup>+</sup>: 255.1529; found, 255.1526. IR (KBr): 2966, 1458, 1361, 1146, 839, 571 cm<sup>-1</sup>.

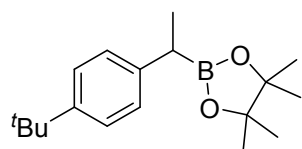

### 2-(1-(4-(*tert*-Butyl)phenyl)ethyl)-4,4,5,5-tetramethyl-1,3,2-dioxaborolane (2b)<sup>2</sup>

Colorless oil (78.6 mg, 91%).

<sup>1</sup>H NMR (400 MHz, CDCl<sub>3</sub>) δ 7.34 (d, *J* = 8.4 Hz, 2H), 7.21 (d, *J* = 8.3 Hz, 2H), 2.47 (q, *J* = 7.5 Hz, 1H), 1.39 (d, *J* = 2.7 Hz, 3H), 1.37 (s, 9H), 1.28 (d, *J* = 4.9 Hz, 12H). <sup>13</sup>C NMR (101 MHz, CDCl<sub>3</sub>) δ 147.6, 141.7, 127.4, 125.2, 83.2, 34.3, 31.5, 24.7, 24.6, 17.3. <sup>11</sup>B NMR (128 MHz, CDCl<sub>3</sub>) δ 33.49.

HRMS-ESI (*m/z*): calcd for C<sub>18</sub>H<sub>29</sub>BO<sub>2</sub>, [M+Na]<sup>+</sup>: 311.2156; found, 311.2157. IR (KBr): 2966, 1458, 1361, 1146, 839, 571 cm<sup>-1</sup>.

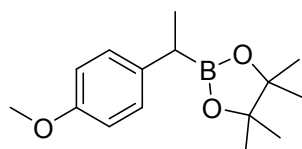

### 2-(1-(4-Methoxyphenyl)ethyl)-4,4,5,5-tetramethyl-1,3,2-dioxaborolane (2c)<sup>2</sup>

Colorless oil (72 mg, 92%).

<sup>1</sup>H NMR (400 MHz, CDCl<sub>3</sub>) δ 7.18 (d, *J* = 8.4 Hz, 2H), 6.85 (d, *J* = 8.4 Hz, 2H), 3.80 (s, 3H), 2.41 (q, *J* = 7.4 Hz, 1H), 1.34 (d, *J* = 7.5 Hz, 3H), 1.24 (d, *J* = 5.2 Hz, 12H). <sup>13</sup>C NMR (101 MHz, CDCl<sub>3</sub>) δ 157.3, 137.0, 128.6, 113.8, 83.2, 55.2, 24.7, 24.6, 17.4. <sup>11</sup>B NMR (128 MHz, CDCl<sub>3</sub>) δ 33.72.

HRMS-ESI (*m/z*): calcd for C<sub>15</sub>H<sub>23</sub>BO<sub>3</sub>, [M+Na]<sup>+</sup>: 285.1635; found, 285.1632. IR (KBr): 2977, 1610, 1510, 1460, 1353, 1321, 1245, 1144, 971, 837 cm<sup>-1</sup>.

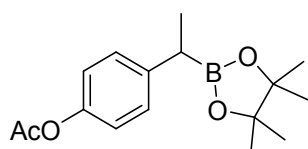

#### 4-(1-(4,4,5,5-Tetramethyl-1,3,2-dioxaborolan-2-yl)ethyl)phenyl acetate (2d)<sup>2</sup>

Light yellow oil (80 mg, 92%).

<sup>1</sup>H NMR (400 MHz, CDCl<sub>3</sub>) δ 7.23 (d, *J* = 8.5 Hz, 2H), 6.99 (d, *J* = 8.5 Hz, 2H), 2.45 (q, *J* = 7.5 Hz, 1H), 2.29 (s, 2H), 1.33 (d, *J* = 7.5 Hz, 2H), 1.22 (d, *J* = 4.1 Hz, 6H). <sup>13</sup>C NMR (101 MHz, CDCl<sub>3</sub>) δ 169.65 (s, 1H), 148.2, 142.5, 128.6, 121.1, 83.3, 24.6, 24.5, 21.1, 17.1. <sup>11</sup>B NMR (128 MHz, CDCl<sub>3</sub>) δ 32.71.

HRMS-ESI (m/z): calcd for C<sub>16</sub>H<sub>23</sub>BO<sub>4</sub>, [M+Na]<sup>+</sup>: 313.1584; found, 313.1582. IR (KBr): 2975, 1761, 1368, 1204, 846 cm<sup>-1</sup>.

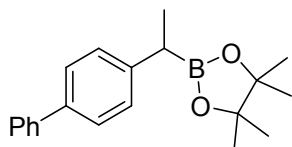

#### 2-(1-([1,1'-Biphenyl]-4-yl)ethyl)-4,4,5,5-tetramethyl-1,3,2-dioxaborolane (2e)<sup>2</sup>

Colorless oil (49.7 mg, 79.7%).

<sup>1</sup>H NMR (400 MHz, CDCl<sub>3</sub>) δ 7.65 (d, *J* = 7.6 Hz, 2H), 7.57 (d, *J* = 7.9 Hz, 2H), 7.47 (t, *J* = 7.6 Hz, 2H), 7.36 (d, *J* = 7.9 Hz, 3H), 2.55 (q, *J* = 7.4 Hz, 1H), 1.44 (d, *J* = 7.5 Hz, 3H), 1.28 (d, *J* = 4.8 Hz, 12H). <sup>13</sup>C NMR (101 MHz, CDCl<sub>3</sub>) δ 144.2, 141.3, 138.0, 128.7, 128.2, 127.1, 127.0, 126.8, 83.4, 24.7, 24.6, 17.1. <sup>11</sup>B NMR (128 MHz, CDCl<sub>3</sub>) δ 32.63.

HRMS-ESI (m/z): calcd for C<sub>20</sub>H<sub>25</sub>BO<sub>2</sub>, [M+Na]<sup>+</sup>: 331.1843; found, 331.1840. IR (KBr): 2976, 1455, 1326, 1143, 842, 694 cm<sup>-1</sup>.

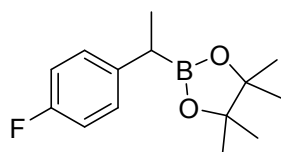

#### 2-(1-(4-Fluorophenyl)ethyl)-4,4,5,5-tetramethyl-1,3,2-dioxaborolane (2f)<sup>1</sup>

Light yellow oil (60 mg, 80%).

<sup>1</sup>H NMR (400 MHz, CDCl<sub>3</sub>) δ 7.19 (dd, *J* = 8.4, 5.6 Hz, 2H), 6.97 (t, *J* = 8.7 Hz, 2H), 2.44 (q, *J* = 7.4 Hz, 1H), 1.34 (d, *J* = 7.5 Hz, 3H), 1.23 (d, *J* = 4.6 Hz, 12H). <sup>13</sup>C NMR (101 MHz, CDCl<sub>3</sub>) δ 160.88 (d, *J* = 242.2 Hz), 140.53 (d, *J* = 3.2 Hz), 129.00 (d, *J* = 7.6 Hz), 114.95 (d, *J* = 21.0 Hz), 83.3, 24.6, 24.5, 17.2. <sup>11</sup>B NMR (128 MHz, CDCl<sub>3</sub>) δ 32.93 (s, 1H).

HRMS-ESI (m/z): calcd for C<sub>14</sub>H<sub>20</sub>BFO<sub>2</sub>, [M+Na]<sup>+</sup>: 273.1435; found, 273.1431. IR (KBr): 2980, 1510, 1454, 1330, 1223, 1145, 981, 841 cm<sup>-1</sup>.

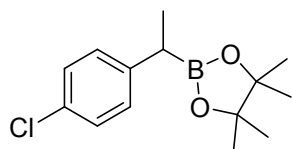

#### 2-(1-(4-Chlorophenyl)ethyl)-4,4,5,5-tetramethyl-1,3,2-dioxaborolane (2g)<sup>3</sup>

Colorless oil (66 mg, 83%).

<sup>1</sup>H NMR (400 MHz, CDCl<sub>3</sub>) δ 7.25 (d, *J* = 8.4 Hz, 2H), 7.17 (d, *J* = 8.4 Hz, 2H), 2.43 (q, *J* = 7.4 Hz, 1H), 1.34 (d, *J* = 7.5 Hz, 3H), 1.23 (d, *J* = 4.2 Hz, 12H). <sup>13</sup>C NMR (101 MHz, CDCl<sub>3</sub>) δ 143.5, 130.7, 129.1, 128.3, 83.4, 24.6, 24.5, 16.9. <sup>11</sup>B NMR (128 MHz, CDCl<sub>3</sub>) δ 32.79 (s, 1H).

HRMS-ESI (m/z): calcd for C<sub>14</sub>H<sub>20</sub>BClO<sub>2</sub>, [M+Na]<sup>+</sup>: 289.1140; found, 289.1140. IR (KBr): 2977, 1488, 1325, 1143, 1061, 1013, 875 cm<sup>-1</sup>.

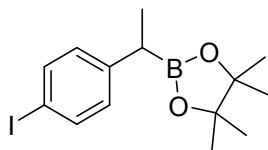

**2-(1-(4-Iodophenyl)ethyl)-4,4,5,5-tetramethyl-1,3,2-dioxaborolane (2h)**

Colorless oil (75 mg, 70%).

<sup>1</sup>H NMR (400 MHz, CDCl<sub>3</sub>) δ 7.56 (d, *J* = 8.3 Hz, 2H), 6.97 (d, *J* = 8.3 Hz, 2H), 2.37 (q, *J* = 7.5 Hz, 1H), 1.29 (d, *J* = 7.5 Hz, 3H), 1.19 (d, *J* = 3.9 Hz, 12H). <sup>13</sup>C NMR (101 MHz, CDCl<sub>3</sub>) δ 144.7, 137.2, 129.9, 90.0, 83.4, 24.7, 24.6, 16.8. <sup>11</sup>B NMR (128 MHz, CDCl<sub>3</sub>) δ 33.24 (s, 1H).

HRMS-ESI (m/z): calcd for C<sub>14</sub>H<sub>20</sub>BIO<sub>2</sub>, [M+Na]<sup>+</sup>: 381.0496; found, 381.0490. IR (KBr): 2979, 1679, 1440, 1370, 1001, 818, 669 cm<sup>-1</sup>.

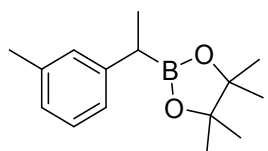

**4,4,5,5-Tetramethyl-2-(1-(*m*-tolyl)ethyl)-1,3,2-dioxaborolane (2i)<sup>2</sup>**

Colorless oil (65.6 mg, 89%).

<sup>1</sup>H NMR (400 MHz, CDCl<sub>3</sub>) δ 7.13 (t, *J* = 7.4 Hz, 1H), 7.01 (d, *J* = 7.6 Hz, 2H), 6.92 (d, *J* = 7.3 Hz, 1H), 2.38 (dd, *J* = 14.6, 7.3 Hz, 1H), 2.30 (s, 3H), 1.31 (d, *J* = 7.5 Hz, 3H), 1.19 (d, *J* = 5.5 Hz, 12H). <sup>13</sup>C NMR (101 MHz, CDCl<sub>3</sub>) δ 144.9, 137.7, 128.6, 128.2, 125.9, 124.8, 83.2, 24.7, 24.6, 21.5, 17.2. <sup>11</sup>B NMR (128 MHz, CDCl<sub>3</sub>) δ 33.49.

HRMS-ESI (m/z): calcd for C<sub>15</sub>H<sub>23</sub>BO<sub>2</sub>, [M+Na]<sup>+</sup>: 269.1686; found, 269.1681. IR (KBr): 2976, 1459, 1352, 1231, 1144, 862 cm<sup>-1</sup>.

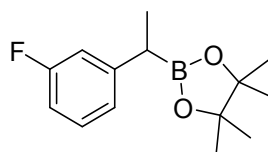

**2-(1-(3-Fluorophenyl)ethyl)-4,4,5,5-tetramethyl-1,3,2-dioxaborolane (2j)<sup>3</sup>**

Light yellow oil (58.5 mg, 78%).

<sup>1</sup>H NMR (400 MHz, CDCl<sub>3</sub>) δ 7.23 (td, *J* = 7.9, 6.4 Hz, 1H), 7.01 (d, *J* = 7.7 Hz, 1H), 6.99 – 6.92 (m, 1H), 6.84 (td, *J* = 8.5, 2.5 Hz, 1H), 2.47 (q, *J* = 7.4 Hz, 1H), 1.35 (d, *J* = 7.5 Hz, 3H), 1.24 (d, *J* = 4.3 Hz, 12H). <sup>13</sup>C NMR (101 MHz, CDCl<sub>3</sub>) δ 162.99 (d, *J* = 244.4 Hz), 147.68 (d, *J* = 7.2 Hz), 129.51 (d, *J* = 8.3 Hz), 123.45 (d, *J* = 2.5 Hz), 114.52 (d, *J* = 21.1 Hz), 111.90 (d, *J* = 21.2 Hz), 83.4, 24.6, 24.5, 16.7. <sup>11</sup>B NMR (128 MHz, CDCl<sub>3</sub>) δ 33.76.

HRMS-ESI (m/z): calcd for C<sub>14</sub>H<sub>20</sub>BFO<sub>2</sub>, [M+Na]<sup>+</sup>: 273.1435; found, 273.1436. IR (KBr): 2978, 1585, 1452, 1327, 1142, 863 cm<sup>-1</sup>.

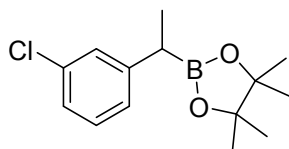

**2-(1-(3-Chlorophenyl)ethyl)-4,4,5,5-tetramethyl-1,3,2-dioxaborolane (2k)**

Colorless oil (60.6 mg, 76%).

$^1\text{H}$  NMR (400 MHz,  $\text{CDCl}_3$ )  $\delta$  7.23 (t,  $J = 1.7$  Hz, 1H), 7.19 (d,  $J = 7.7$  Hz, 1H), 7.17 – 7.09 (m, 2H), 2.44 (q,  $J = 7.4$  Hz, 1H), 1.34 (d,  $J = 7.5$  Hz, 3H), 1.23 (d,  $J = 4.2$  Hz, 12H).  $^{13}\text{C}$  NMR (101 MHz,  $\text{CDCl}_3$ )  $\delta$  147.1, 134.0, 129.4, 127.8, 126.0, 125.3, 83.5, 24.6, 24.5, 16.7.  $^{11}\text{B}$  NMR (128 MHz,  $\text{CDCl}_3$ )  $\delta$  32.91.

HRMS-ESI ( $m/z$ ): calcd for  $\text{C}_{14}\text{H}_{20}\text{BClO}_2$ ,  $[\text{M}+\text{Na}]^+$ : 289.1140; found, 289.1140. IR (KBr): 2977, 1466, 1326, 1142, 876  $\text{cm}^{-1}$ .

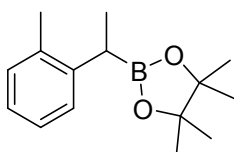

**4,4,5,5-Tetramethyl-2-(1-(o-tolyl)ethyl)-1,3,2-dioxaborolane (2l)<sup>1</sup>**

Colorless oil (59.7 mg, 81%).

$^1\text{H}$  NMR (400 MHz,  $\text{CDCl}_3$ )  $\delta$  7.24 – 7.09 (m, 3H), 7.04 (t,  $J = 7.3$  Hz, 1H), 2.58 (q,  $J = 7.4$  Hz, 1H), 2.31 (s, 3H), 1.31 (d,  $J = 7.5$  Hz, 3H), 1.21 (d,  $J = 4.8$  Hz, 12H).  $^{13}\text{C}$  NMR (101 MHz,  $\text{CDCl}_3$ )  $\delta$  143.4, 135.6, 130.0, 127.1, 126.0, 125.0, 83.2, 24.7, 24.6, 19.9, 16.3.  $^{11}\text{B}$  NMR (128 MHz,  $\text{CDCl}_3$ )  $\delta$  33.29.

HRMS-ESI ( $m/z$ ): calcd for  $\text{C}_{15}\text{H}_{23}\text{BO}_2$ ,  $[\text{M}+\text{Na}]^+$ : 269.1689; found, 269.1689. IR (KBr): 2977, 1446, 1324, 1144, 845  $\text{cm}^{-1}$ .

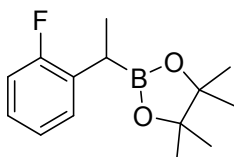

**2-(1-(2-Fluorophenyl)ethyl)-4,4,5,5-tetramethyl-1,3,2-dioxaborolane (2m)<sup>2</sup>**

Colorless oil (45.7 mg, 61%).

$^1\text{H}$  NMR (400 MHz,  $\text{CDCl}_3$ )  $\delta$  7.25 (td,  $J = 7.7, 1.8$  Hz, 1H), 7.18 – 7.11 (m, 1H), 7.08 (dt,  $J = 7.4, 3.7$  Hz, 1H), 7.04 – 6.97 (m, 1H), 2.60 (q,  $J = 7.5$  Hz, 1H), 1.34 (d,  $J = 7.6$  Hz, 3H), 1.26 (d,  $J = 4.1$  Hz, 12H).  $^{13}\text{C}$  NMR (101 MHz,  $\text{CDCl}_3$ )  $\delta$  160.86 (d,  $J = 243.6$  Hz), 132.24 (d,  $J = 15.7$  Hz), 129.55 (d,  $J = 5.1$  Hz), 126.65 (d,  $J = 8.2$  Hz), 124.02 (d,  $J = 3.3$  Hz), 114.92 (d,  $J = 22.7$  Hz), 83.4, 24.6, 24.5, 15.8.

HRMS-ESI ( $m/z$ ): calcd for  $\text{C}_{14}\text{H}_{20}\text{BFO}_2$ ,  $[\text{M}+\text{Na}]^+$ : 273.1435; found, 273.1439. IR (KBr): 2978, 1488, 1356, 1325, 1144, 754  $\text{cm}^{-1}$ .

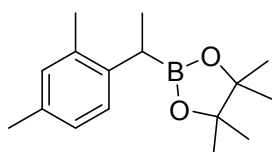

**2-(1-(2,4-Dimethylphenyl)ethyl)-4,4,5,5-tetramethyl-1,3,2-dioxaborolane (2n)**

Colorless oil (67.8 mg, 87%).

<sup>1</sup>H NMR (400 MHz, CDCl<sub>3</sub>) δ 7.13 (d, *J* = 8.0 Hz, 1H), 6.99 (d, *J* = 7.2 Hz, 2H), 2.57 (dd, *J* = 14.8, 7.3 Hz, 1H), 2.31 (d, *J* = 3.1 Hz, 6H), 1.33 (d, *J* = 7.5 Hz, 3H), 1.25 (d, *J* = 4.8 Hz, 12H). <sup>13</sup>C NMR (101 MHz, CDCl<sub>3</sub>) δ 140.3, 135.4, 134.3, 130.9, 127.2, 126.7, 83.2, 77.3, 77.0, 76.7, 24.7, 24.6, 20.8, 19.8, 16.5. <sup>11</sup>B NMR (128 MHz, CDCl<sub>3</sub>) δ 33.65 (s, 1H).

HRMS-ESI (m/z): calcd for C<sub>16</sub>H<sub>25</sub>BO<sub>2</sub>, [M+Na]<sup>+</sup>: 283.1843; found, 283.1847. IR (KBr): 2978, 1451, 1326, 1145, 845, 818 cm<sup>-1</sup>.

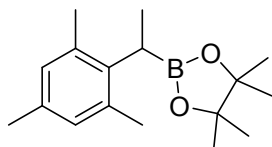**2-(1-(Mesitylethyl)-4,4,5,5-tetramethyl-1,3,2-dioxaborolane (2o)**

Colorless oil (61.6 mg, 75%).

<sup>1</sup>H NMR (400 MHz, CDCl<sub>3</sub>) δ 6.73 (s, 2H), 2.53 (q, *J* = 7.5 Hz, 1H), 2.20 (s, 6H), 2.14 (s, 3H), 1.17 (s, 12H), 1.15 (d, *J* = 7.6 Hz, 3H). <sup>13</sup>C NMR (101 MHz, CDCl<sub>3</sub>) δ 139.1, 135.8, 134.3, 129.2, 83.3, 25.0, 24.8, 20.7, 15.3. <sup>11</sup>B NMR (128 MHz, CDCl<sub>3</sub>) δ 33.89.

HRMS-ESI (m/z): calcd for C<sub>17</sub>H<sub>27</sub>BO<sub>2</sub>, [M+Na]<sup>+</sup>: 297.1999; found, 297.2000. IR (KBr): 2976, 1459, 1349, 1312, 1145, 846 cm<sup>-1</sup>.

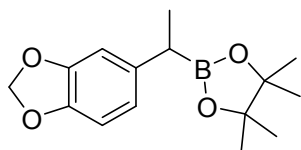**2-(1-(Benzo[d][1,3]dioxol-5-yl)ethyl)-4,4,5,5-tetramethyl-1,3,2-dioxaborolane (2p)**

Colorless oil (73.6 mg, 89%).

<sup>1</sup>H NMR (400 MHz, CDCl<sub>3</sub>) δ 6.80 – 6.63 (m, 3H), 5.91 (s, 2H), 2.37 (q, *J* = 7.4 Hz, 1H), 1.31 (d, *J* = 7.5 Hz, 3H), 1.24 (d, *J* = 4.5 Hz, 12H). <sup>13</sup>C NMR (101 MHz, CDCl<sub>3</sub>) δ 147.5, 145.1, 138.9, 120.4, 108.4, 108.1, 100.6, 83.3, 24.7, 24.6, 17.5. <sup>11</sup>B NMR (128 MHz, CDCl<sub>3</sub>) δ 33.28.

HRMS-ESI (m/z): calcd for C<sub>15</sub>H<sub>21</sub>BO<sub>4</sub>, [M+Na]<sup>+</sup>: 299.1428; found, 299.1431. IR (KBr): 2978, 1488, 1443, 1243, 1104, 1039, 674 cm<sup>-1</sup>.

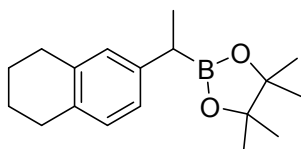**4,4,5,5-Tetramethyl-2-(1-(5,6,7,8-tetrahydronaphthalen-2-yl)ethyl)-1,3,2-dioxaborolane (2q)**

Colorless oil (72.9 mg, 85%).

<sup>1</sup>H NMR (400 MHz, CDCl<sub>3</sub>) δ 7.00 (s, 2H), 6.95 (s, 1H), 2.77 (d, *J* = 5.7 Hz, 4H), 2.39 (q, *J* = 7.4 Hz, 1H), 1.83 (dt, *J* = 5.9, 2.9 Hz, 4H), 1.35 (d, *J* = 7.4 Hz, 3H), 1.27 (d, *J* = 4.7 Hz, 12H). <sup>13</sup>C NMR (101 MHz, CDCl<sub>3</sub>) δ 142.0, 136.8, 133.7, 129.1, 128.5, 125.1, 83.2, 29.5, 29.0, 24.6, 23.4, 23.3, 17.5. <sup>11</sup>B NMR (128 MHz, CDCl<sub>3</sub>) δ 33.39.

HRMS-ESI (m/z): calcd for C<sub>18</sub>H<sub>27</sub>BO<sub>2</sub>, [M+Na]<sup>+</sup>: 309.2000; found, 309.2003. IR (KBr): 2926,

1444, 1324, 1146, 821  $\text{cm}^{-1}$ .

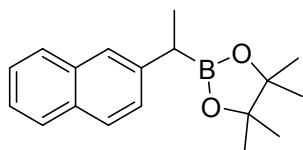

**4,4,5,5-Tetramethyl-2-(1-(naphthalen-2-yl)ethyl)-1,3,2-dioxaborolane (2r)**

White solid (77.8 mg, 92%), m.p. = 61 – 63 °C.

$^1\text{H}$  NMR (400 MHz,  $\text{CDCl}_3$ )  $\delta$  7.83 (t,  $J$  = 9.0 Hz, 3H), 7.73 (s, 1H), 7.54 – 7.40 (m, 3H), 2.71 (dd,  $J$  = 14.5, 7.1 Hz, 0H), 1.52 (d,  $J$  = 7.4 Hz, 3H), 1.28 (d,  $J$  = 6.1 Hz, 12H).  $^{13}\text{C}$  NMR (101 MHz,  $\text{CDCl}_3$ )  $\delta$  142.6, 133.9, 131.8, 127.7, 127.6, 127.5, 127.3, 125.7, 125.3, 124.8, 83.4, 24.7, 24.6, 16.8.  $^{11}\text{B}$  NMR (128 MHz,  $\text{CDCl}_3$ )  $\delta$  34.47.

HRMS-ESI (m/z): calcd for  $\text{C}_{18}\text{H}_{23}\text{BO}_2$ ,  $[\text{M}+\text{Na}]^+$ : 305.1687; found, 305.1690. IR (KBr): 2976, 1460, 1328, 1144, 856, 747  $\text{cm}^{-1}$ .

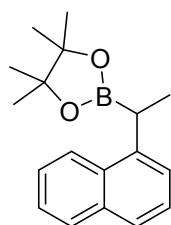

**4,4,5,5-Tetramethyl-2-(1-(naphthalen-1-yl)ethyl)-1,3,2-dioxaborolane (2s)<sup>1</sup>**

Colorless oil (75.2 mg, 89%).

$^1\text{H}$  NMR (400 MHz,  $\text{CDCl}_3$ )  $\delta$  8.18 (d,  $J$  = 8.2 Hz, 1H), 7.93 – 7.82 (m, 1H), 7.72 (dd,  $J$  = 7.1, 2.1 Hz, 1H), 7.60 – 7.43 (m, 4H), 3.19 (q,  $J$  = 7.4 Hz, 1H), 1.57 (d,  $J$  = 7.5 Hz, 3H), 1.26 (d,  $J$  = 4.2 Hz, 12H).  $^{13}\text{C}$  NMR (101 MHz,  $\text{CDCl}_3$ )  $\delta$  141.5, 134.0, 132.1, 128.7, 125.8, 125.4, 125.2, 124.3, 124.1, 83.4, 24.7, 24.6, 16.5.  $^{11}\text{B}$  NMR (128 MHz,  $\text{CDCl}_3$ )  $\delta$  33.86.

HRMS-ESI (m/z): calcd for  $\text{C}_{18}\text{H}_{23}\text{BO}_2$ ,  $[\text{M}+\text{Na}]^+$ : 305.1687; found, 305.1690. IR (KBr): 2978, 1458, 1378, 1328, 1145, 851, 782  $\text{cm}^{-1}$ .

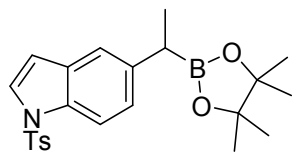

**5-(1-(4,4,5,5-Tetramethyl-1,3,2-dioxaborolan-2-yl)ethyl)-1-tosyl-1H-indole (2t)**

Brown oil (96 mg, 76%).

$^1\text{H}$  NMR (400 MHz,  $\text{CDCl}_3$ )  $\delta$  7.86 (d,  $J$  = 8.6 Hz, 1H), 7.74 (d,  $J$  = 8.2 Hz, 2H), 7.48 (d,  $J$  = 3.6 Hz, 1H), 7.34 (s, 1H), 7.18 (d,  $J$  = 8.0 Hz, 3H), 6.56 (d,  $J$  = 3.6 Hz, 1H), 2.48 (q,  $J$  = 7.4 Hz, 1H), 2.30 (s, 3H), 1.32 (d,  $J$  = 7.5 Hz, 3H), 1.18 (d,  $J$  = 6.4 Hz, 12H).  $^{13}\text{C}$  NMR (101 MHz,  $\text{CDCl}_3$ )  $\delta$  144.7, 140.1, 135.5, 133.0, 131.1, 129.8, 126.8, 126.1, 125.1, 119.8, 113.3, 109.1, 83.3, 24.6, 24.5, 21.5, 17.4.  $^{11}\text{B}$  NMR (128 MHz,  $\text{CDCl}_3$ )  $\delta$  32.32.

HRMS-ESI (m/z): calcd for  $\text{C}_{23}\text{H}_{28}\text{BNO}_4\text{S}$ ,  $[\text{M}+\text{H}]^+$ : 426.1909; found, 426.1911. IR (KBr): 2978, 1456, 1370, 1173, 1135, 673, 584  $\text{cm}^{-1}$ .



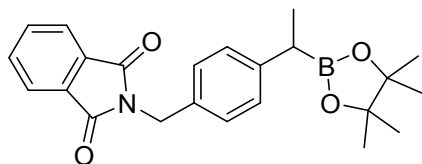

**2-(4-(1-(4,4,5,5-Tetramethyl-1,3,2-dioxaborolan-2-yl)ethyl)benzyl)isoindoline-1,3-dione (2u)**

White solid (105 mg, 90%), m.p. = 121 – 123 °C.

<sup>1</sup>H NMR (400 MHz, CDCl<sub>3</sub>) δ 7.85 (dd, *J* = 5.3, 3.0 Hz, 2H), 7.70 (dd, *J* = 5.3, 3.1 Hz, 2H), 7.35 (d, *J* = 7.9 Hz, 2H), 7.18 (d, *J* = 7.9 Hz, 2H), 4.82 (s, 2H), 2.41 (q, *J* = 7.4 Hz, 1H), 1.30 (d, *J* = 7.5 Hz, 3H), 1.21 (d, *J* = 4.5 Hz, 12H). <sup>13</sup>C NMR (101 MHz, CDCl<sub>3</sub>) δ 168.1, 144.7, 133.9, 133.0, 132.2, 128.7, 128.1, 123.3, 83.3, 41.3, 24.7, 24.6, 17.1. <sup>11</sup>B NMR (128 MHz, CDCl<sub>3</sub>) δ 33.63.

HRMS-ESI (m/z): calcd for C<sub>23</sub>H<sub>26</sub>BNO<sub>4</sub>, [M+Na]<sup>+</sup>: 414.1851; found, 414.1859. IR (KBr): 2980, 1718, 1387, 1335, 1151, 849, 720 cm<sup>-1</sup>.

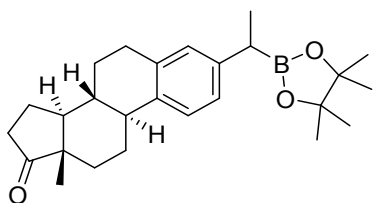

**(8R,9S,13S,14S)-13-Methyl-3-(1-(4,4,5,5-tetramethyl-1,3,2-dioxaborolan-2-yl)ethyl)-6,7,8,9,11,12,13,14,15,16-decahydro-17H-cyclopenta[a]phenanthren-17-one (2v)**

Light yellow oil (32 mg, 79%).

18:1 *d.r.* value was measured by HPLC analysis with the corresponding alcohol obtained after oxidation.

<sup>1</sup>H NMR (400 MHz, CDCl<sub>3</sub>) δ 7.21 (d, *J* = 8.0 Hz, 1H), 7.03 (d, *J* = 8.0 Hz, 1H), 6.97 (s, 1H), 2.99 – 2.85 (m, 2H), 2.57 – 2.27 (m, 4H), 2.21 – 1.95 (m, 4H), 1.70 – 1.42 (m, 6H), 1.33 (d, *J* = 7.5 Hz, 3H), 1.25 (d, *J* = 4.3 Hz, 12H), 0.93 (s, 3H). <sup>13</sup>C NMR (101 MHz, CDCl<sub>3</sub>) δ 221.0, 142.3, 136.3, 136.2, 128.4, 125.4, 125.3, 83.2, 50.5, 48.0, 44.3, 38.2, 35.9, 31.6, 29.4, 26.6, 25.7, 24.6, 21.6, 17.4, 13.9. <sup>11</sup>B NMR (128 MHz, CDCl<sub>3</sub>) δ 32.94.

HRMS-ESI (m/z): calcd for C<sub>26</sub>H<sub>37</sub>BO<sub>3</sub>, [M+H]<sup>+</sup>: 409.2913; found, 409.2920. IR (KBr): 2977, 1736, 1458, 1328, 1147, 783, 732 cm<sup>-1</sup>.

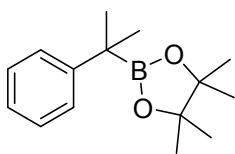

**4,4,5,5-Tetramethyl-2-(2-phenylpropan-2-yl)-1,3,2-dioxaborolane (2w)<sup>3</sup>**

Colorless oil (52.1 mg, 71%).

<sup>1</sup>H NMR (400 MHz, CDCl<sub>3</sub>) δ 7.32 (dt, *J* = 19.4, 5.9 Hz, 4H), 7.18 (d, *J* = 6.9 Hz, 1H), 1.38 (s, 6H), 1.23 (s, 12H). <sup>13</sup>C NMR (101 MHz, CDCl<sub>3</sub>) δ 148.6, 128.1, 126.3, 125.0, 83.3, 25.6, 24.5. <sup>11</sup>B NMR (128 MHz, CDCl<sub>3</sub>) δ 34.33 (s, 1H).

HRMS-ESI (m/z): calcd for C<sub>15</sub>H<sub>23</sub>BO<sub>2</sub>, [M+Na]<sup>+</sup>: 269.1686; found, 269.1690. IR (KBr): 2923, 1641, 1522, 1298, 794, 715 cm<sup>-1</sup>.

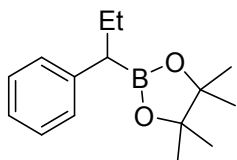

**4,4,5,5-Tetramethyl-2-(1-phenylpropyl)-1,3,2-dioxaborolane (2aa)<sup>2</sup>**

Colorless oil (55.3 mg, 75%).

<sup>1</sup>H NMR (400 MHz, CDCl<sub>3</sub>) δ 7.39 – 7.27 (m, 2H), 7.23 (d, *J* = 6.7 Hz, 2H), 7.16 (t, *J* = 7.0 Hz, 1H), 2.25 (t, *J* = 7.9 Hz, 1H), 1.97 – 1.85 (m, 1H), 1.75 – 1.65 (m, 1H), 1.23 (d, *J* = 8.0 Hz, 12H), 0.94 (t, *J* = 7.3 Hz, 3H). <sup>13</sup>C NMR (101 MHz, CDCl<sub>3</sub>) δ 143.3, 128.4, 128.2, 125.1, 83.2, 25.8, 24.7, 24.6, 13.9. <sup>11</sup>B NMR (128 MHz, CDCl<sub>3</sub>) δ 34.58.

HRMS-ESI (*m/z*): calcd for C<sub>15</sub>H<sub>23</sub>BO<sub>2</sub>, [M+Na]<sup>+</sup>: 269.1686; found, 269.1691. IR (KBr): 2924, 1643, 1367, 1319, 701 cm<sup>-1</sup>.

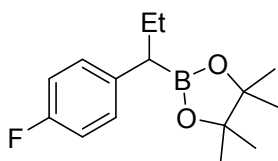

**2-(1-(4-Fluorophenyl)propyl)-4,4,5,5-tetramethyl-1,3,2-dioxaborolane (2ab)**

Colorless oil (53 mg, 67%).

<sup>1</sup>H NMR (400 MHz, CDCl<sub>3</sub>) δ 7.17 (dd, *J* = 8.5, 5.6 Hz, 2H), 6.95 (t, *J* = 8.7 Hz, 2H), 2.22 (t, *J* = 7.9 Hz, 1H), 1.87 (dq, *J* = 22.1, 7.4 Hz, 1H), 1.65 (tt, *J* = 14.7, 7.4 Hz, 1H), 1.22 (d, *J* = 6.8 Hz, 12H), 0.91 (t, *J* = 7.3 Hz, 3H). <sup>13</sup>C NMR (101 MHz, CDCl<sub>3</sub>) δ 160.93 (d, *J* = 242.4 Hz), 138.90 (d, *J* = 3.3 Hz), 129.61 (d, *J* = 7.6 Hz), 114.89 (d, *J* = 20.8 Hz), 83.3, 25.9, 24.6, 24.5, 13.7. <sup>11</sup>B NMR (128 MHz, CDCl<sub>3</sub>) δ 33.45.

HRMS-ESI (*m/z*): calcd for C<sub>15</sub>H<sub>22</sub>BFO<sub>2</sub>, [M+Na]<sup>+</sup>: 287.1592; found, 287.1587. IR (KBr): 2923, 1505, 1365, 1316, 1218, 1141, 793, 719 cm<sup>-1</sup>.

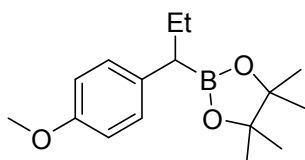

**2-(1-(4-Methoxyphenyl)propyl)-4,4,5,5-tetramethyl-1,3,2-dioxaborolane (2ac)**

Colorless oil (67 mg, 81%).

<sup>1</sup>H NMR (400 MHz, CDCl<sub>3</sub>) δ 7.15 (d, *J* = 8.5 Hz, 2H), 6.83 (d, *J* = 8.5 Hz, 2H), 3.79 (s, 3H), 2.19 (t, *J* = 7.8 Hz, 1H), 1.86 (dq, *J* = 14.9, 7.4 Hz, 1H), 1.71 – 1.59 (m, 1H), 1.23 (d, *J* = 7.6 Hz, 12H), 0.92 (t, *J* = 7.3 Hz, 3H). <sup>13</sup>C NMR (101 MHz, CDCl<sub>3</sub>) δ 157.3, 135.3, 129.2, 113.7, 83.1, 55.1, 26.0, 24.7, 24.6, 13.8. <sup>11</sup>B NMR (128 MHz, CDCl<sub>3</sub>) δ 32.72.

HRMS-ESI (*m/z*): calcd for C<sub>16</sub>H<sub>25</sub>BO<sub>3</sub>, [M+Na]<sup>+</sup>: 299.1792; found, 299.1797. IR (KBr): 2974, 1608, 1510, 1454, 1245, 1147, 834 cm<sup>-1</sup>.

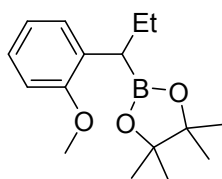

**(R)-2-(1-(2-Methoxyphenyl)propyl)-4,4,5,5-tetramethyl-1,3,2-dioxaborolane (2ad)**

Colorless oil (60.4 mg, 73%).

$^1\text{H}$  NMR (400 MHz,  $\text{CDCl}_3$ )  $\delta$  7.23 – 7.10 (m, 2H), 6.90 (td,  $J = 7.5, 1.2$  Hz, 1H), 6.83 (d,  $J = 8.1$  Hz, 1H), 3.81 (s, 3H), 2.38 (t,  $J = 7.6$  Hz, 1H), 1.87 (dt,  $J = 14.3, 7.2$  Hz, 1H), 1.69 (dt,  $J = 13.1, 7.4$  Hz, 1H), 1.25 (d,  $J = 7.5$  Hz, 12H), 0.94 (t,  $J = 7.3$  Hz, 3H).  $^{13}\text{C}$  NMR (101 MHz,  $\text{CDCl}_3$ )  $\delta$  157.0, 132.2, 129.6, 126.2, 120.4, 109.9, 82.9, 55.0, 24.8, 24.7, 23.8, 13.9.  $^{11}\text{B}$  NMR (128 MHz,  $\text{CDCl}_3$ )  $\delta$  33.11.

HRMS-ESI (m/z): calcd for  $\text{C}_{16}\text{H}_{25}\text{BO}_3$ ,  $[\text{M}+\text{Na}]^+$ : 299.1792; found, 299.1795. IR (KBr): 2971, 1593, 1458, 1366, 1315, 1240, 1145, 1031, 750  $\text{cm}^{-1}$ .

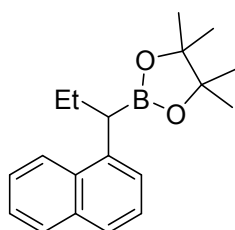

**4,4,5,5-Tetramethyl-2-(1-(naphthalen-1-yl)propyl)-1,3,2-dioxaborolane (2ae)**

Colorless oil (65.7 mg, 74%).

$^1\text{H}$  NMR (400 MHz,  $\text{CDCl}_3$ )  $\delta$  8.16 (d,  $J = 8.2$  Hz, 1H), 7.81 (d,  $J = 7.7$  Hz, 1H), 7.65 (dd,  $J = 6.6, 2.7$  Hz, 1H), 7.50 – 7.36 (m, 4H), 2.95 (t,  $J = 7.6$  Hz, 1H), 2.05 (tt,  $J = 15.1, 7.5$  Hz, 1H), 1.91 – 1.79 (m, 1H), 1.18 (d,  $J = 13.1$  Hz, 12H), 0.99 (t,  $J = 7.3$  Hz, 3H).  $^{13}\text{C}$  NMR (101 MHz,  $\text{CDCl}_3$ )  $\delta$  139.9, 134.1, 132.3, 128.7, 125.8, 125.7, 125.3, 125.2, 125.1, 124.2, 83.4, 25.3, 24.8, 24.5, 14.2.  $^{11}\text{B}$  NMR (128 MHz,  $\text{CDCl}_3$ )  $\delta$  33.62.

HRMS-ESI (m/z): calcd for  $\text{C}_{19}\text{H}_{25}\text{BO}_2$ ,  $[\text{M}+\text{Na}]^+$ : 319.1843; found, 319.1848. IR (KBr): 2973, 1368, 1325, 1142, 963, 782  $\text{cm}^{-1}$ .

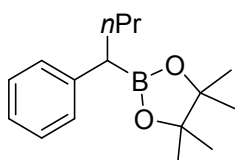

**4,4,5,5-Tetramethyl-2-(1-phenylbutyl)-1,3,2-dioxaborolane (2af)<sup>4</sup>**

Colorless oil (42.9 mg, 55%).

$^1\text{H}$  NMR (400 MHz,  $\text{CDCl}_3$ )  $\delta$  7.28 – 7.18 (m, 4H), 7.12 (dd,  $J = 9.4, 4.3$  Hz, 1H), 2.32 (t,  $J = 10.1$  Hz, 1H), 1.83 (dt,  $J = 12.7, 5.7$  Hz, 1H), 1.70 – 1.59 (m, 1H), 1.30 (dd,  $J = 13.9, 6.5$  Hz, 3H), 1.20 (d,  $J = 7.2$  Hz, 12H), 0.90 (t,  $J = 5.9$  Hz, 3H).  $^{13}\text{C}$  NMR (101 MHz,  $\text{CDCl}_3$ )  $\delta$  143.5, 128.4, 128.2, 125.0, 83.2, 34.8, 24.7, 24.6, 22.4, 14.1.  $^{11}\text{B}$  NMR (128 MHz,  $\text{CDCl}_3$ )  $\delta$  32.75.

HRMS-ESI (m/z): calcd for  $\text{C}_{16}\text{H}_{25}\text{BO}_2$ ,  $[\text{M}+\text{Na}]^+$ : 283.1843; found, 283.1851. IR (KBr): 2922, 1740, 1367, 1319, 1143, 853, 794, 698  $\text{cm}^{-1}$ .

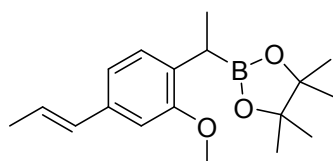

**(E)-2-(1-(2-Methoxy-4-(prop-1-en-1-yl)phenyl)ethyl)-4,4,5,5-tetramethyl-1,3,2-dioxaborolane**

**(2ai)**

Colorless oil (67.9 mg, 75%).

$^1\text{H}$  NMR (400 MHz,  $\text{CDCl}_3$ )  $\delta$  7.07 (d,  $J = 7.7$  Hz, 1H), 6.85 (dd,  $J = 7.7, 1.6$  Hz, 1H), 6.78 (d,  $J = 1.6$  Hz, 1H), 6.36 (dd,  $J = 15.7, 1.8$  Hz, 1H), 6.15 (dq,  $J = 15.6, 6.6$  Hz, 1H), 3.79 (s, 3H), 2.43 (q,  $J = 7.6$  Hz, 1H), 1.85 (dd,  $J = 6.5, 1.6$  Hz, 3H), 1.27 (d,  $J = 7.4$  Hz, 3H), 1.21 (d,  $J = 3.3$  Hz, 13H).  $^{13}\text{C}$  NMR (101 MHz,  $\text{CDCl}_3$ )  $\delta$  156.9, 136.3, 132.8, 131.3, 128.3, 124.4, 118.6, 107.1, 82.9, 54.9, 24.7, 24.6, 18.4, 15.2.  $^{11}\text{B}$  NMR (128 MHz,  $\text{CDCl}_3$ )  $\delta$  34.01.

HRMS-ESI ( $m/z$ ): calcd for  $\text{C}_{18}\text{H}_{27}\text{BO}_3$ ,  $[\text{M}+\text{Na}]^+$ : 325.1949; found, 325.1954. IR (KBr): 2975, 2930, 1691, 1458, 1355, 1253, 1145, 846  $\text{cm}^{-1}$ .

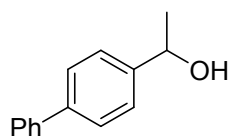**1-([1,1'-Biphenyl]-4-yl)ethan-1-ol (3)<sup>5</sup>**

White solid (17.4 mg, 88%), m.p. = 87.5 – 88.5 °C.

$^1\text{H}$  NMR (400 MHz,  $\text{CDCl}_3$ )  $\delta$  7.58 (dt,  $J = 8.4, 2.0$  Hz, 4H), 7.50 – 7.39 (m, 4H), 7.38 – 7.31 (m, 1H), 4.96 (q,  $J = 6.5$  Hz, 1H), 1.77 (s, 1H), 1.54 (d,  $J = 6.5$  Hz, 3H).  $^{13}\text{C}$  NMR (101 MHz,  $\text{CDCl}_3$ )  $\delta$  144.8, 140.9, 140.5, 128.8, 127.3, 127.1, 125.8, 70.2, 25.2.

IR (KBr): 3329, 2913, 1644, 1555, 1403, 1077, 834, 691  $\text{cm}^{-1}$ .

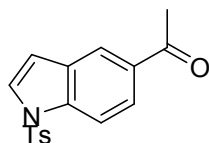**1-(1-Tosyl-1H-indol-5-yl)ethan-1-one (4)**

Brown solid (23.7 mg, 76%), m.p. = 136 – 137 °C.

$^1\text{H}$  NMR (400 MHz,  $\text{CDCl}_3$ )  $\delta$  8.19 (d,  $J = 1.6$  Hz, 1H), 8.06 (dt,  $J = 8.8, 0.8$  Hz, 1H), 7.97 (dd,  $J = 8.7, 1.7$  Hz, 1H), 7.83 – 7.76 (m, 2H), 7.66 (d,  $J = 3.7$  Hz, 1H), 7.27 (d,  $J = 8.1$  Hz, 2H), 6.77 (dd,  $J = 3.7, 0.8$  Hz, 1H), 2.65 (s, 3H), 2.37 (s, 3H).  $^{13}\text{C}$  NMR (101 MHz,  $\text{CDCl}_3$ )  $\delta$  197.6, 145.4, 137.3, 135.0, 132.8, 130.6, 130.0, 127.7, 126.8, 124.7, 122.6, 113.4, 109.5, 26.7, 21.6.

HRMS-ESI ( $m/z$ ): calcd for  $\text{C}_{17}\text{H}_{15}\text{NO}_3\text{S}$ ,  $[\text{M}+\text{H}]^+$ : 314.0845 found, 314.0843. IR (KBr): 1677, 1434, 1281, 1174, 1127, 813, 670, 583  $\text{cm}^{-1}$ .

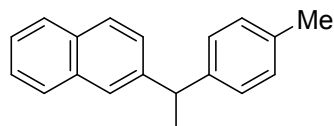**2-(1-(p-Tolyl)ethyl)naphthalene (5)**

Colorless oil (17.5 mg, 71%).

$^1\text{H}$  NMR (400 MHz,  $\text{CDCl}_3$ )  $\delta$  7.82 (ddd,  $J = 7.4, 5.2, 1.6$  Hz, 2H), 7.78 – 7.69 (m, 2H), 7.46 (pd,  $J = 6.9, 1.4$  Hz, 2H), 7.34 (dd,  $J = 8.5, 1.8$  Hz, 1H), 7.23 – 7.06 (m, 4H), 4.31 (q,  $J = 7.2$  Hz, 1H), 2.35 (s, 3H), 1.75 (d,  $J = 7.2$  Hz, 3H).  $^{13}\text{C}$  NMR (101 MHz,  $\text{CDCl}_3$ )  $\delta$  144.0, 143.3, 135.6, 133.5, 132.1, 129.1, 127.9, 127.7, 127.6, 127.5, 126.8, 125.9, 125.3, 125.3, 44.4, 21.8, 21.0.

HRMS-ESI (m/z): calcd for C<sub>19</sub>H<sub>18</sub>, [M+Na]<sup>+</sup>: 269.1301; found, 269.1295. IR (KBr): 1645, 1511, 810, 725 cm<sup>-1</sup>.

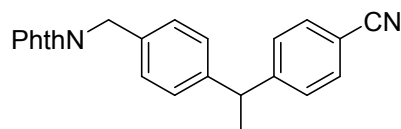

**4-(1-(4-((1,3-Dioxisoindolin-2-yl)methyl)phenyl)ethyl)benzonitrile (6)**

White solid (24 mg, 66%), m.p. = 147 – 148 °C.

<sup>1</sup>H NMR (400 MHz, CDCl<sub>3</sub>) δ 7.90 – 7.83 (m, 2H), 7.73 (dd, *J* = 5.4, 3.0 Hz, 2H), 7.60 – 7.53 (m, 2H), 7.44 – 7.36 (m, 2H), 7.33 – 7.29 (m, 2H), 7.20 – 7.11 (m, 2H), 4.83 (s, 2H), 4.18 (q, *J* = 7.2 Hz, 1H), 1.63 (d, *J* = 7.2 Hz, 3H). <sup>13</sup>C NMR (101 MHz, CDCl<sub>3</sub>) δ 168.0, 151.6, 144.3, 134.7, 134.0, 132.3, 132.1, 128.9, 128.4, 127.8, 123.3, 118.9, 110.0, 44.6, 41.2, 21.4.

HRMS-ESI (m/z): calcd for C<sub>24</sub>H<sub>18</sub>N<sub>2</sub>O<sub>2</sub>, [M+Na]<sup>+</sup>: 389.1260; found, 389.1263. IR (KBr): 1710, 1390, 1341, 1089, 937, 716, 622 cm<sup>-1</sup>.

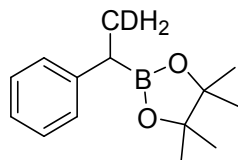

**4,4,5,5-Tetramethyl-2-(1-phenylethyl-2-d)-1,3,2-dioxaborolane (dl-2a)**

Colorless oil (51 mg, 73%).

<sup>1</sup>H NMR (400 MHz, CDCl<sub>3</sub>) δ 7.34 – 7.24 (m, 4H), 7.21 – 7.12 (m, 1H), 2.48 (t, *J* = 7.1 Hz, 0.84H), 1.42 – 1.33 (m, 2H), 1.25 (d, *J* = 5.4 Hz, 12H). <sup>13</sup>C NMR (101 MHz, CDCl<sub>3</sub>) δ 145.0, 128.3, 127.8, 125.1, 83.3, 24.7, 24.6, 17.1, 17.0, 16.8, 16.6. <sup>11</sup>B NMR (128 MHz, CDCl<sub>3</sub>) δ 33.45.

HRMS-ESI (m/z): calcd for C<sub>14</sub>H<sub>20</sub>DBO<sub>2</sub>, [M+Na]<sup>+</sup>: 256.1592; found, 256.1597. IR (KBr): 2979, 1609, 1363, 1145, 850, 697 cm<sup>-1</sup>.

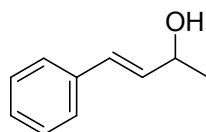

**(E)-4-Phenylbut-3-en-2-ol (8)<sup>6</sup>**

Colorless oil (32.4 mg, 73%).

<sup>1</sup>H NMR (400 MHz, CDCl<sub>3</sub>) δ 7.41 (d, *J* = 7.4 Hz, 2H), 7.34 (t, *J* = 7.5 Hz, 2H), 7.28 (d, *J* = 6.8 Hz, 1H), 6.59 (d, *J* = 15.9 Hz, 1H), 6.29 (dd, *J* = 15.9, 6.4 Hz, 1H), 4.51 (p, *J* = 6.3 Hz, 1H), 1.85 (s, 1H), 1.40 (d, *J* = 6.4 Hz, 3H). <sup>13</sup>C NMR (101 MHz, CDCl<sub>3</sub>) δ 136.7, 133.6, 129.4, 128.6, 127.6, 126.5, 68.9, 23.4.

IR (KBr): 2975, 1714, 1447, 1060, 968, 749, 695 cm<sup>-1</sup>.

## D. References

1. J. Hu, H. Sun, W. Cai, X. Pu, Y. Zhang, Z. Shi, *J. Org. Chem.*, **2016**, *81*, 14–24.
2. J. Peng, J. H. Docherty, A. P. Domineyb, S. P. Thomas, *Chem. Commun.*, **2017**, 53,

4726–4729.

3. G. Zhang, H. Zeng, J. Wu, Z. Yin, S. Zheng, J. C. Fettinger, *Angew. Chem. Int., Ed.*, **2016**, *55*, 14369–14372.
4. M. L. Scheuermann, E. J. Johnson, P. J. Chirik, *Org. Lett.*, **2015**, *17*, 2716–2719.
5. C. Wang, Q. Luo, H. Sun, X. Guo, Z. Xi, *J. Am. Chem. Soc.*, **2007**, *129*, 3094–3095.
6. M. Barbero, S. Cadamuro, S. Dughera, *Synthesis*, **2006**, *20*, 3443–3452.

## E. NMR Spectra for All Compounds

### <sup>1</sup>H NMR of compound 2a

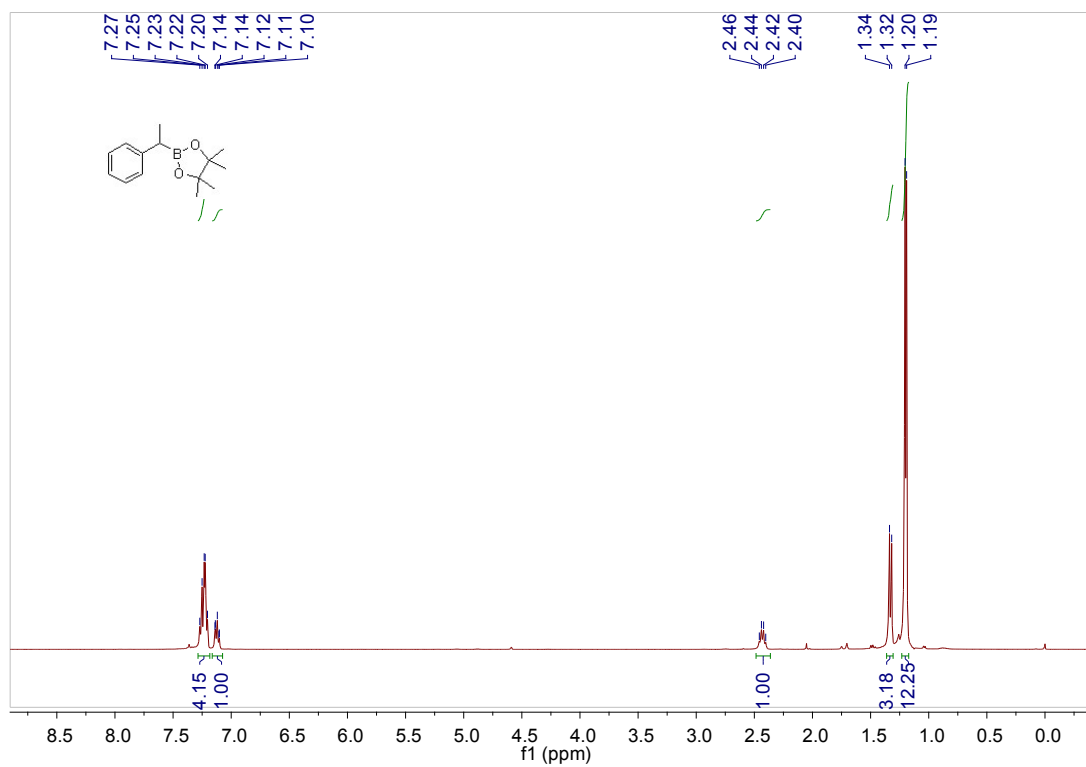

### <sup>13</sup>C NMR of compound 2a

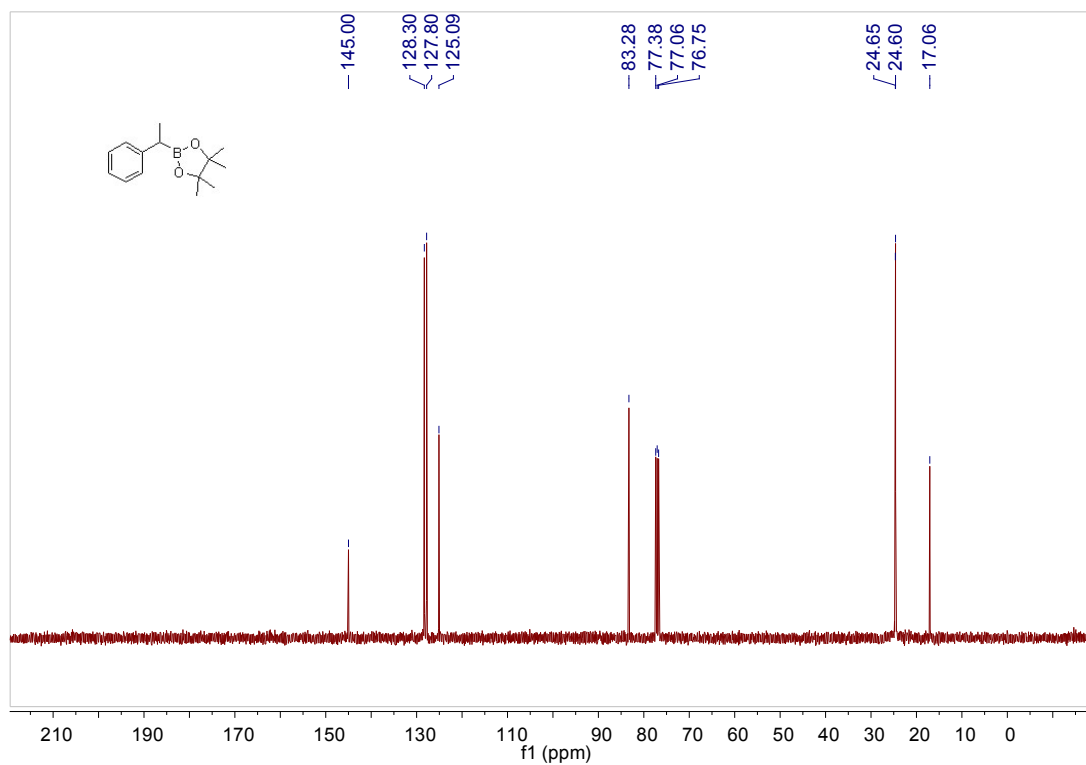

### $^{11}\text{B}$ NMR of compound 2a

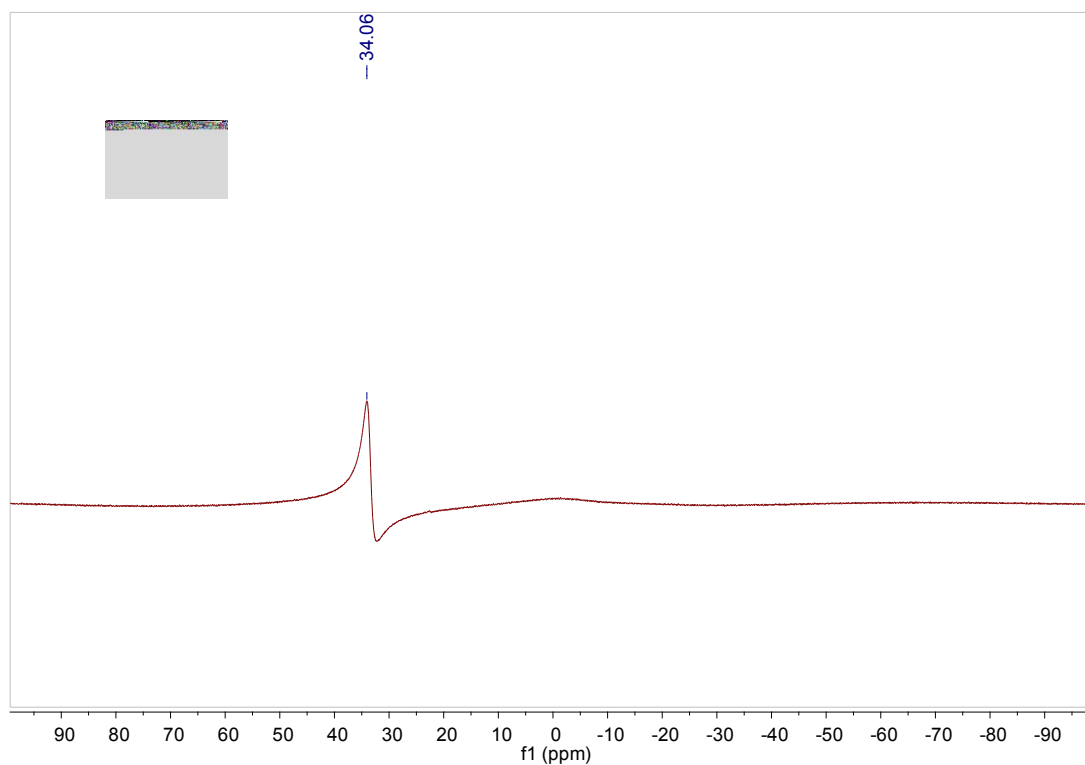

### $^1\text{H}$ NMR of compound 2b

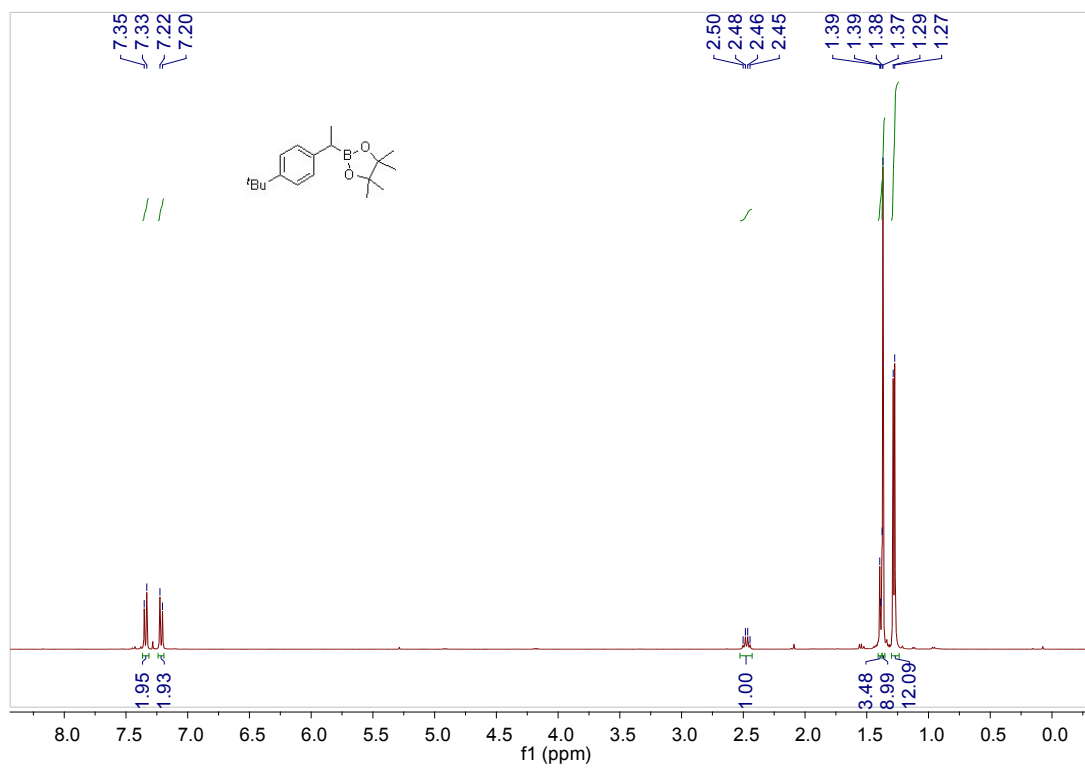



### <sup>13</sup>C NMR of compound 2b

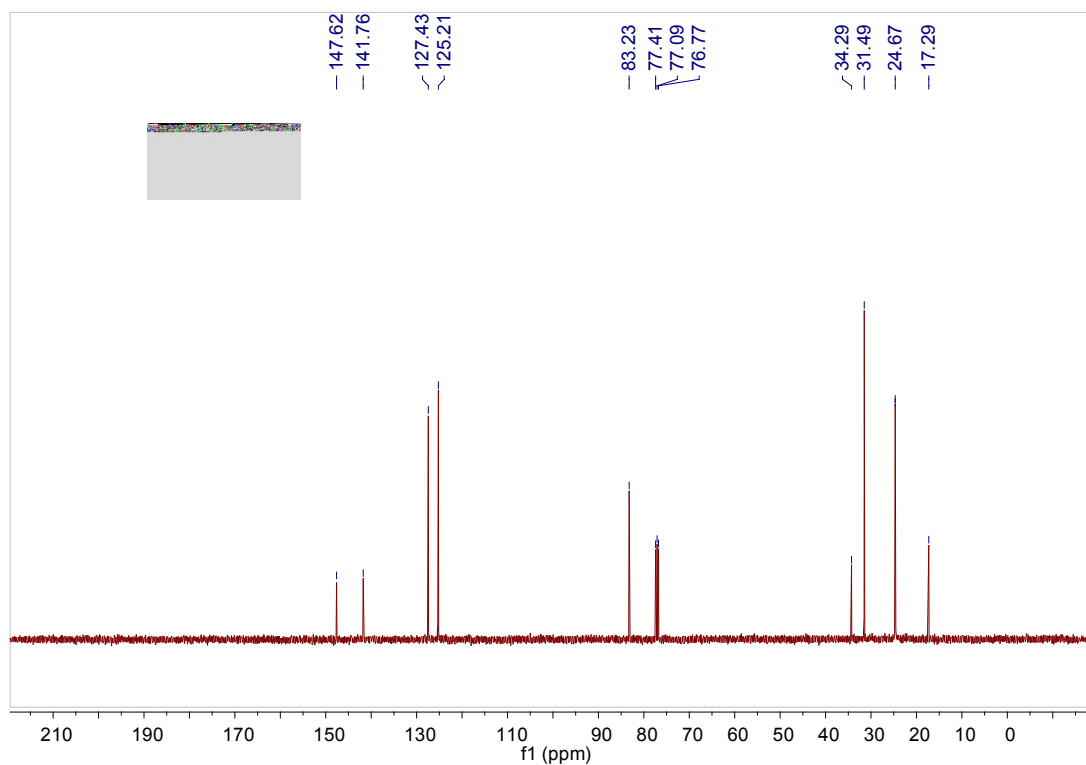

### <sup>11</sup>B NMR of compound 2b

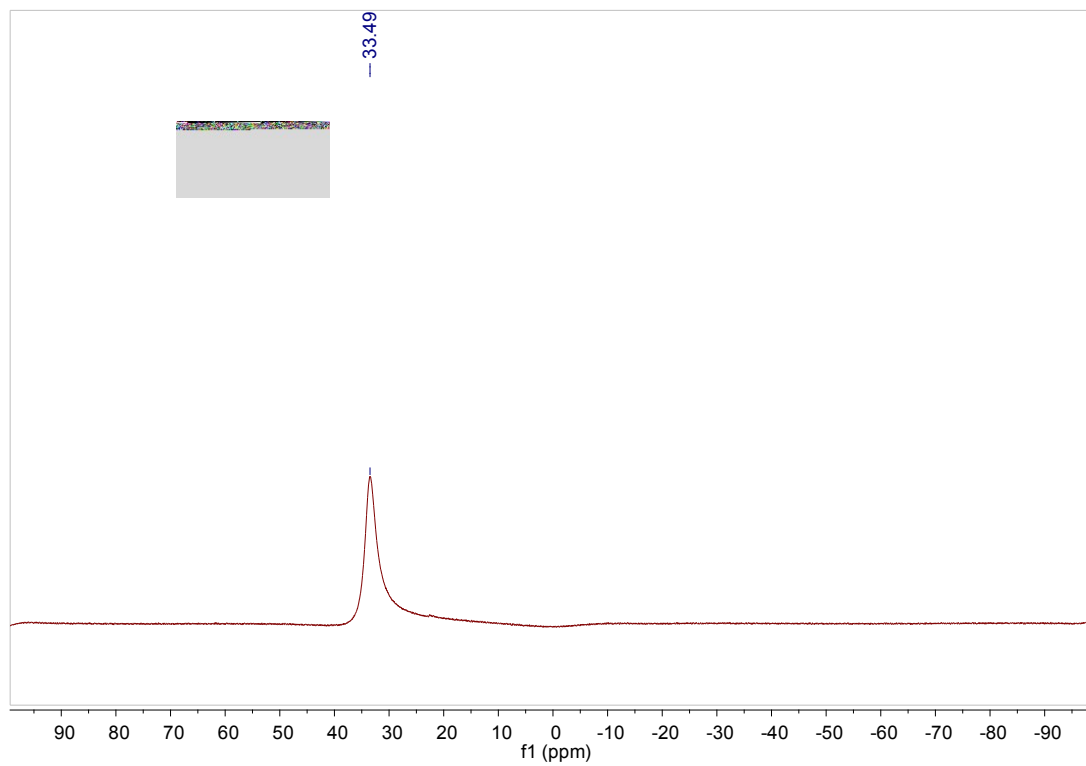

### <sup>1</sup>H NMR of compound 2c

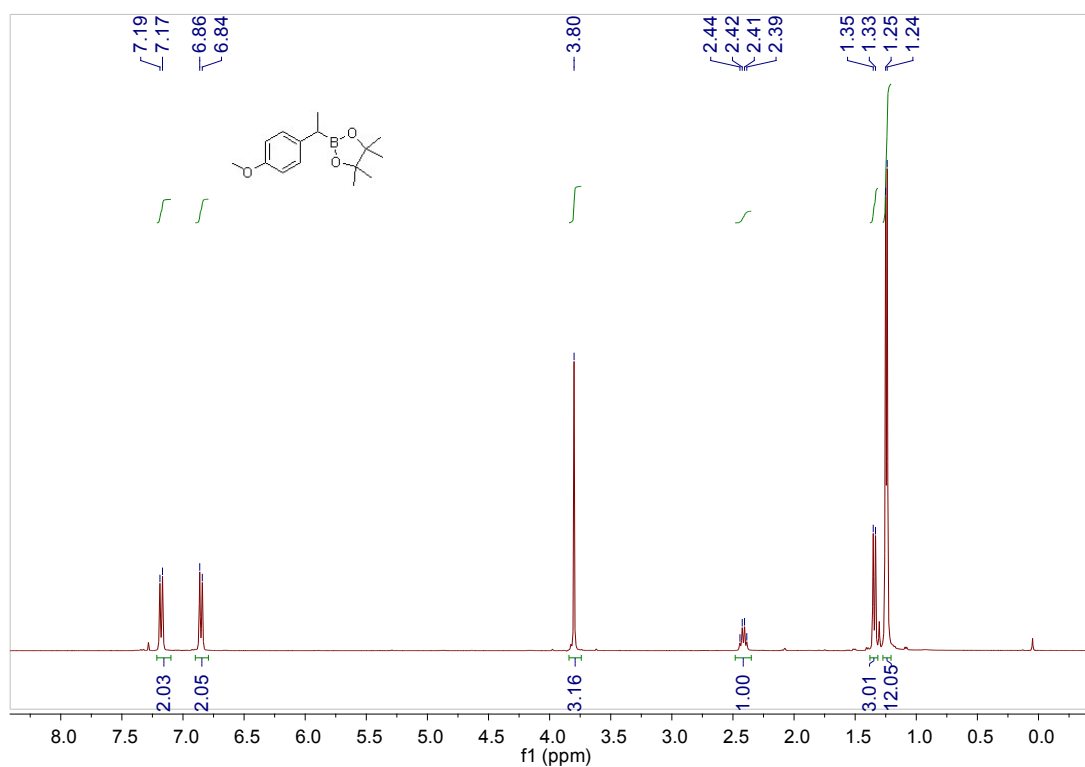

### <sup>13</sup>C NMR of compound 2c

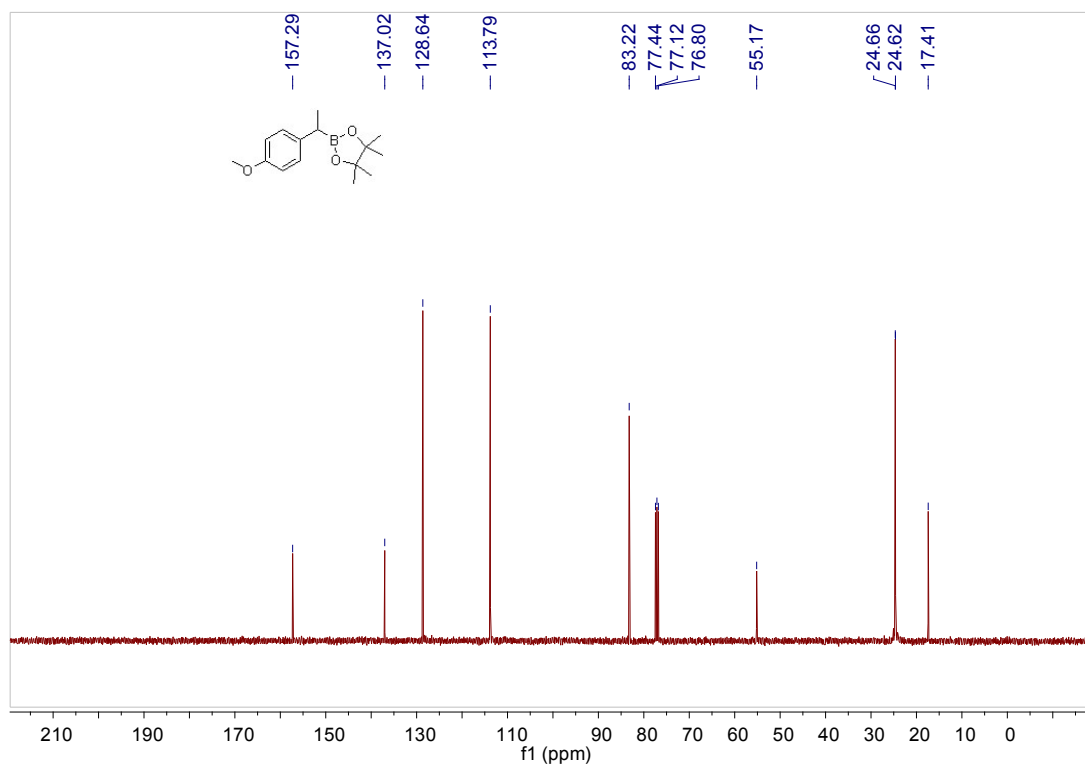

### $^{11}\text{B}$ NMR of compound 2c

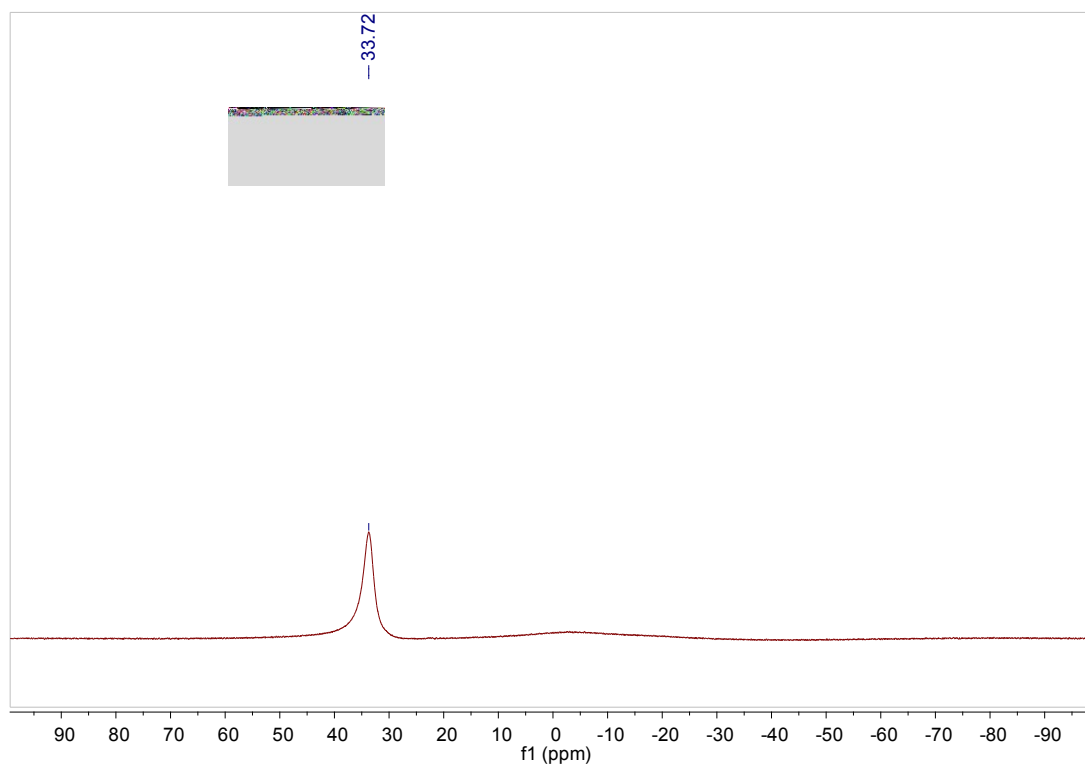

### $^1\text{H}$ NMR of compound 2d

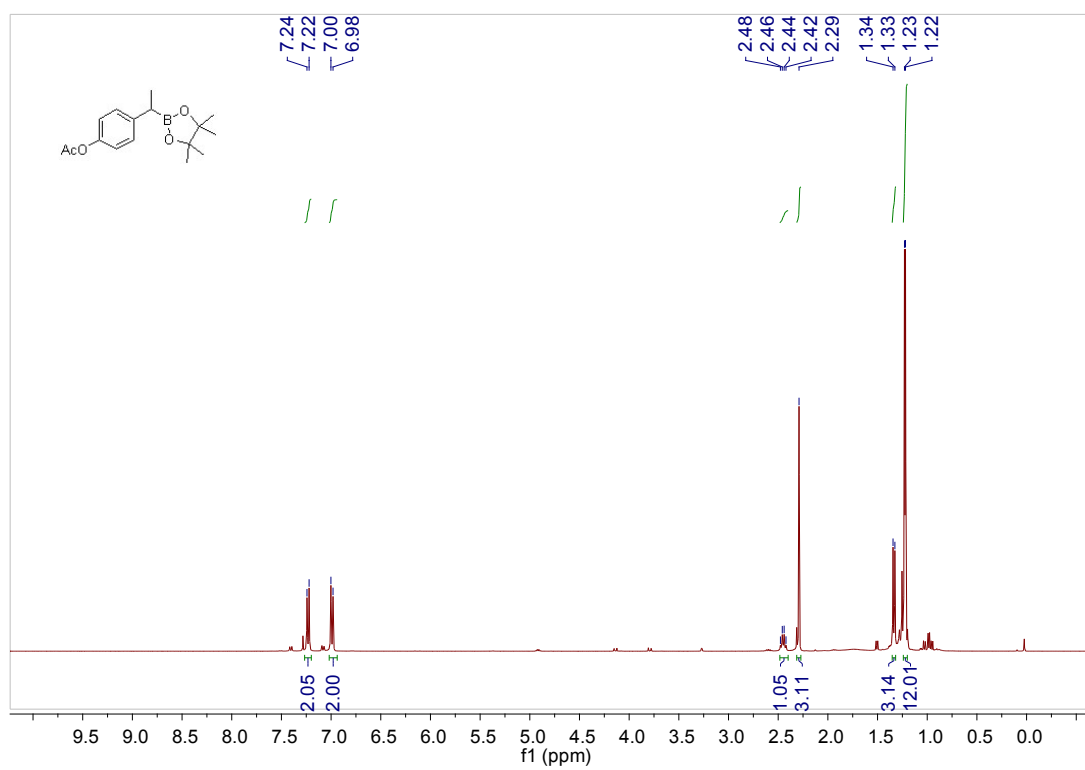

### <sup>13</sup>C NMR of compound 2d

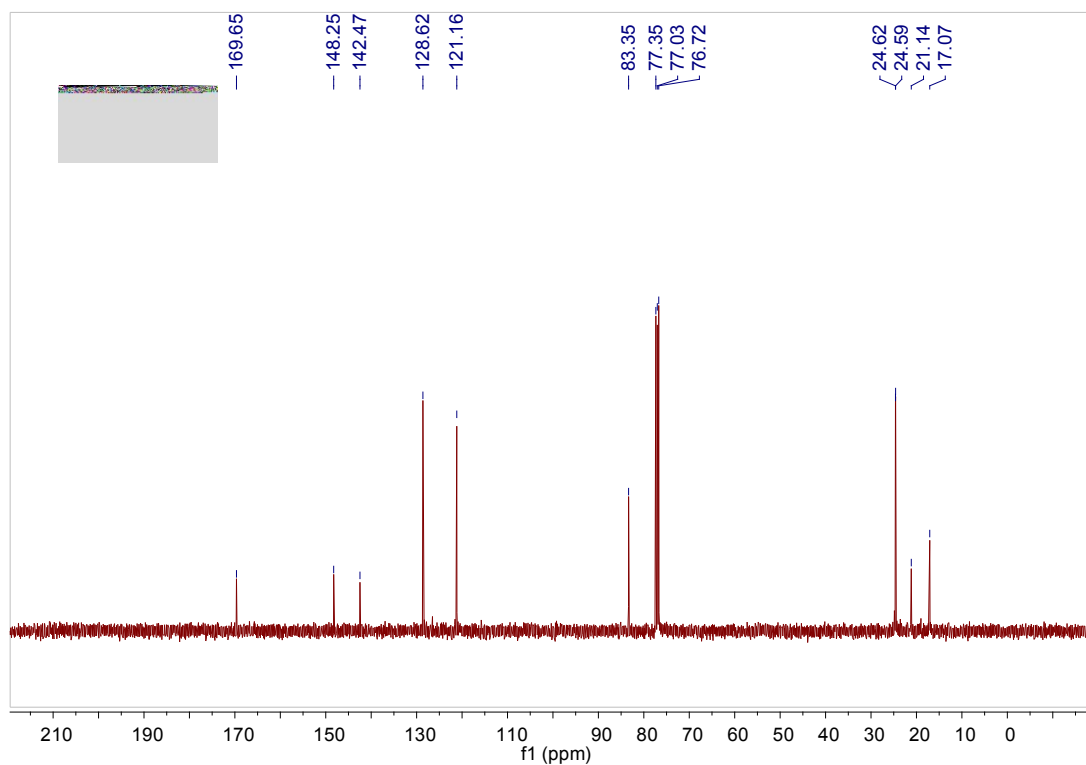

### <sup>11</sup>B NMR of compound 2d

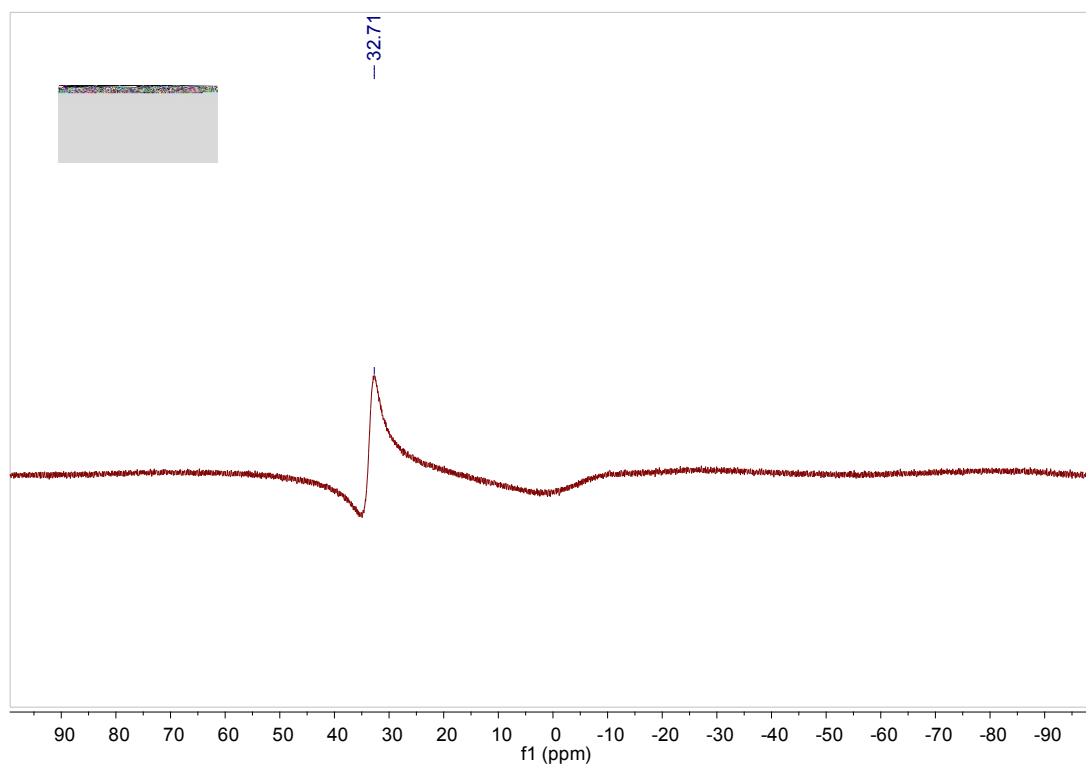

### <sup>1</sup>H NMR of compound 2e

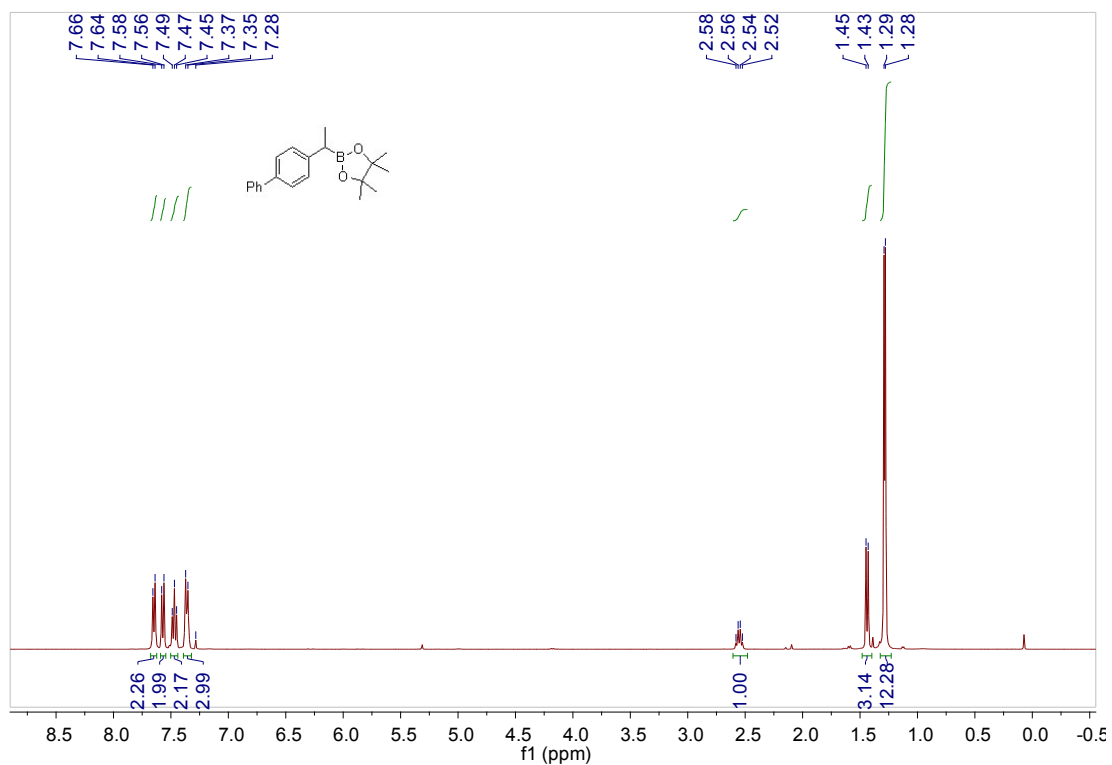

### <sup>13</sup>C NMR of compound 2e

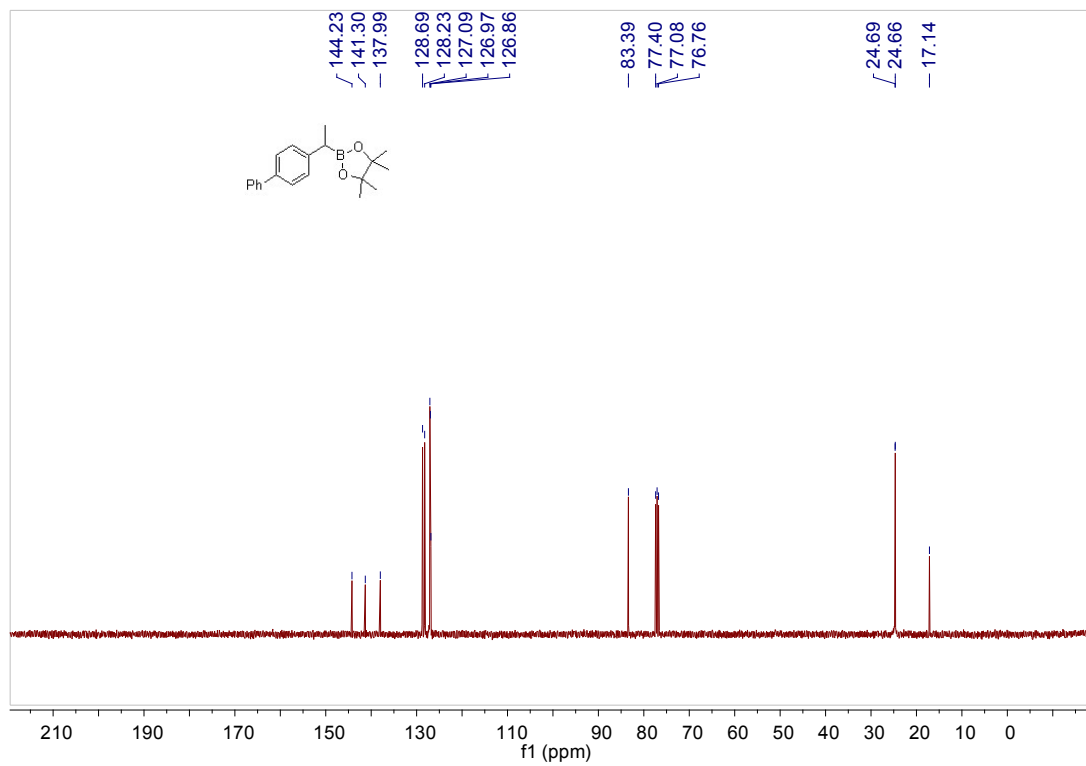

### $^{11}\text{B}$ NMR of compound 2e

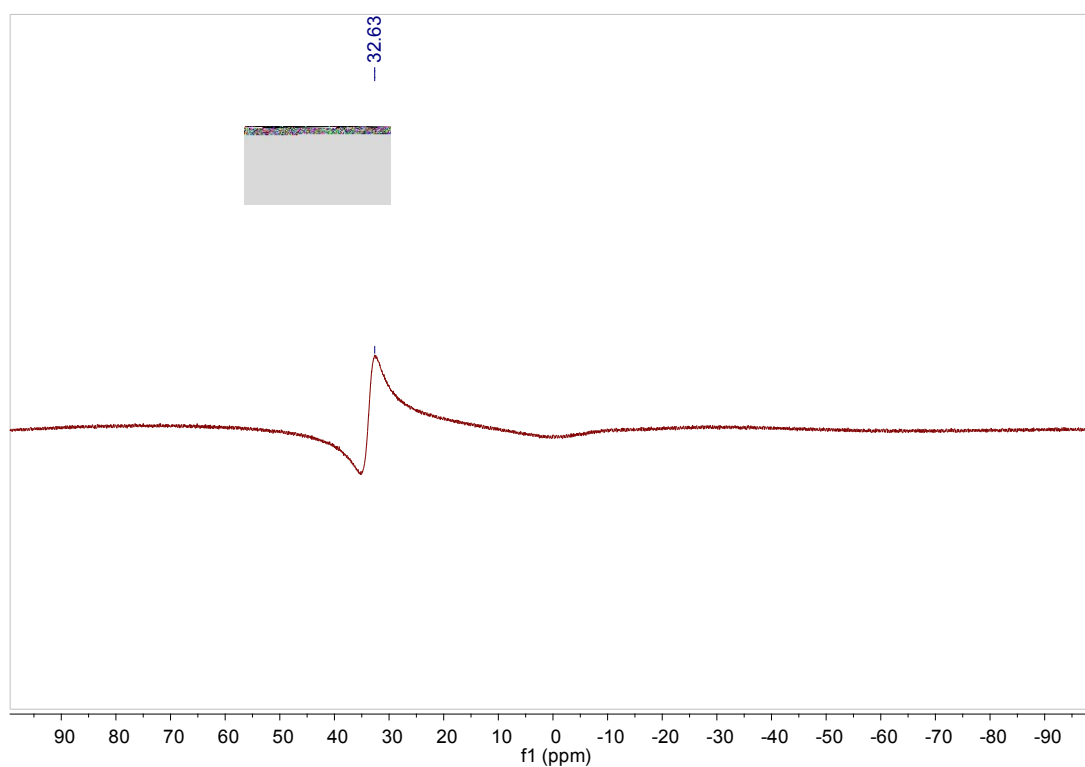

### $^1\text{H}$ NMR of compound 2f

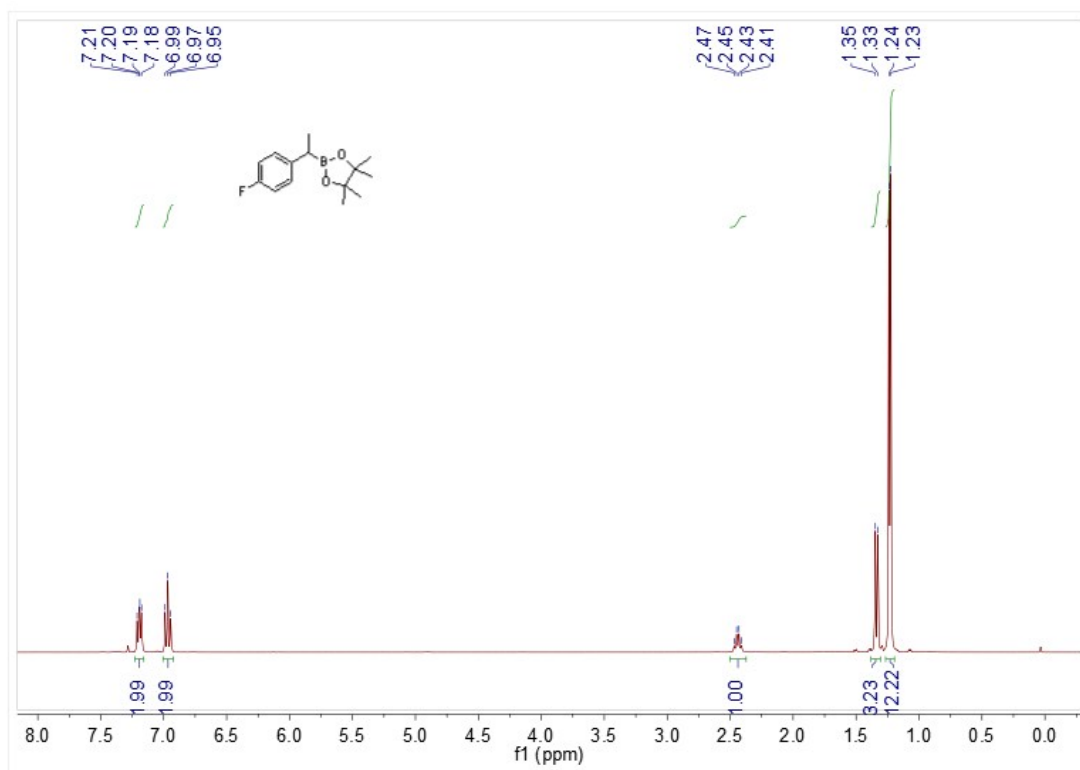

### <sup>13</sup>C NMR of compound 2f

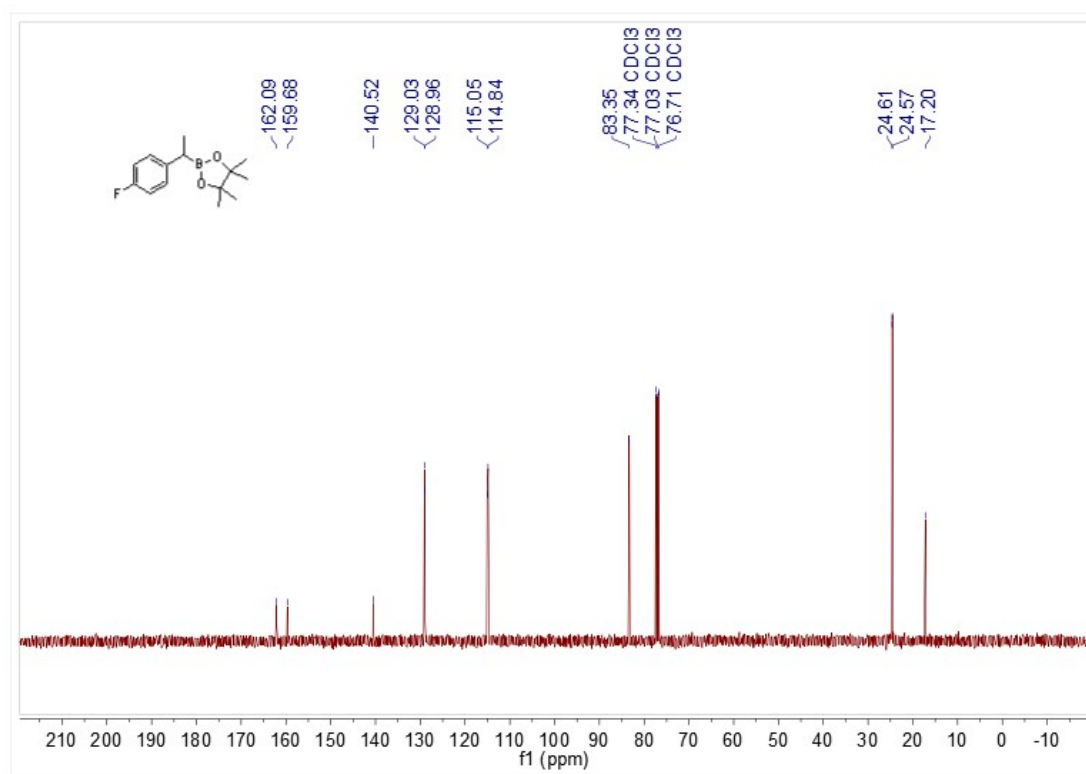

### <sup>11</sup>B NMR of compound 2f

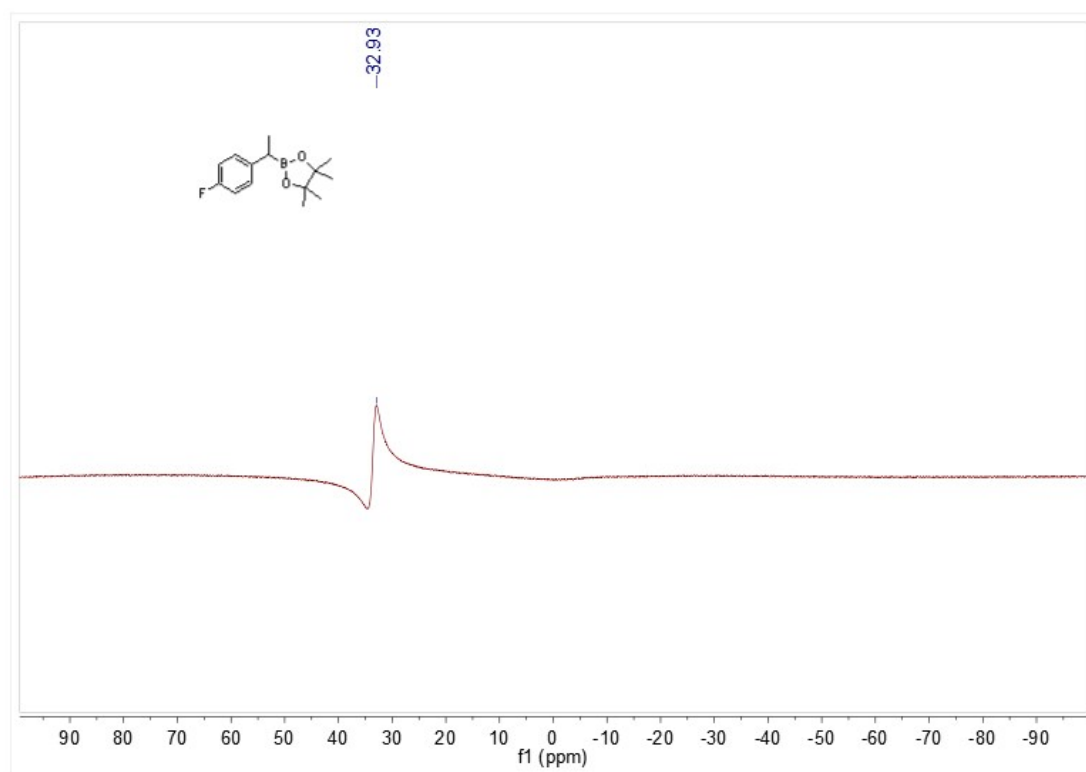

### <sup>1</sup>H NMR of compound 2g

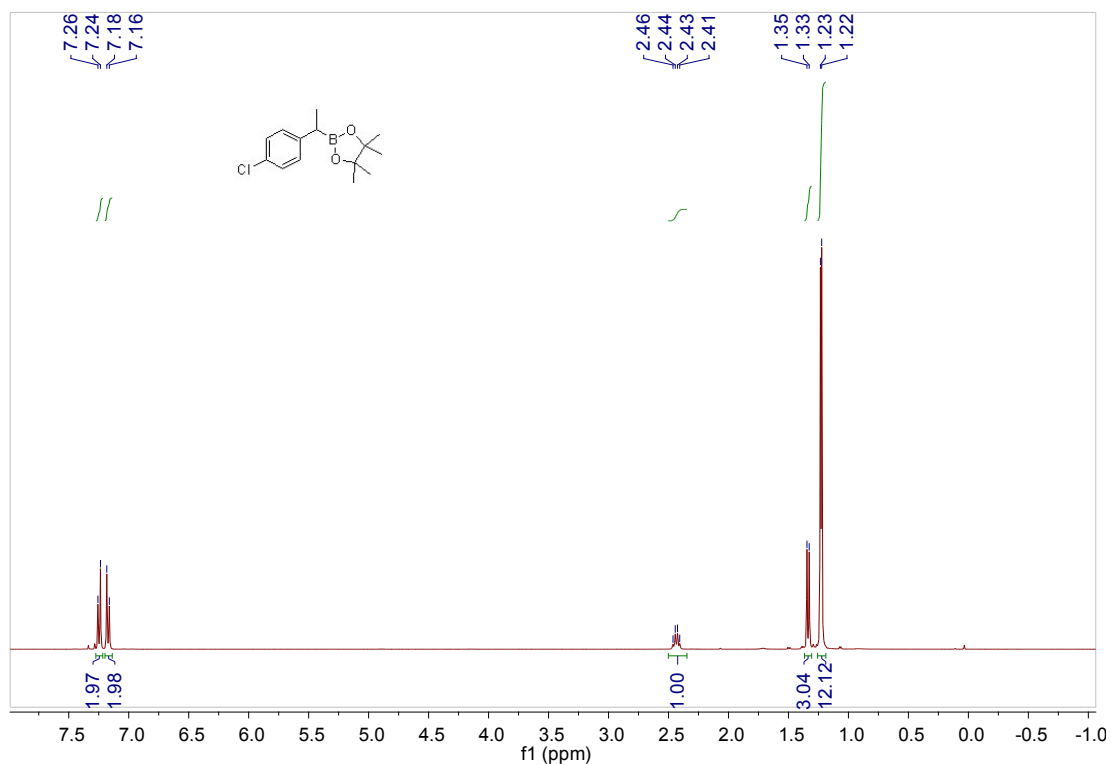

### <sup>13</sup>C NMR of compound 2g

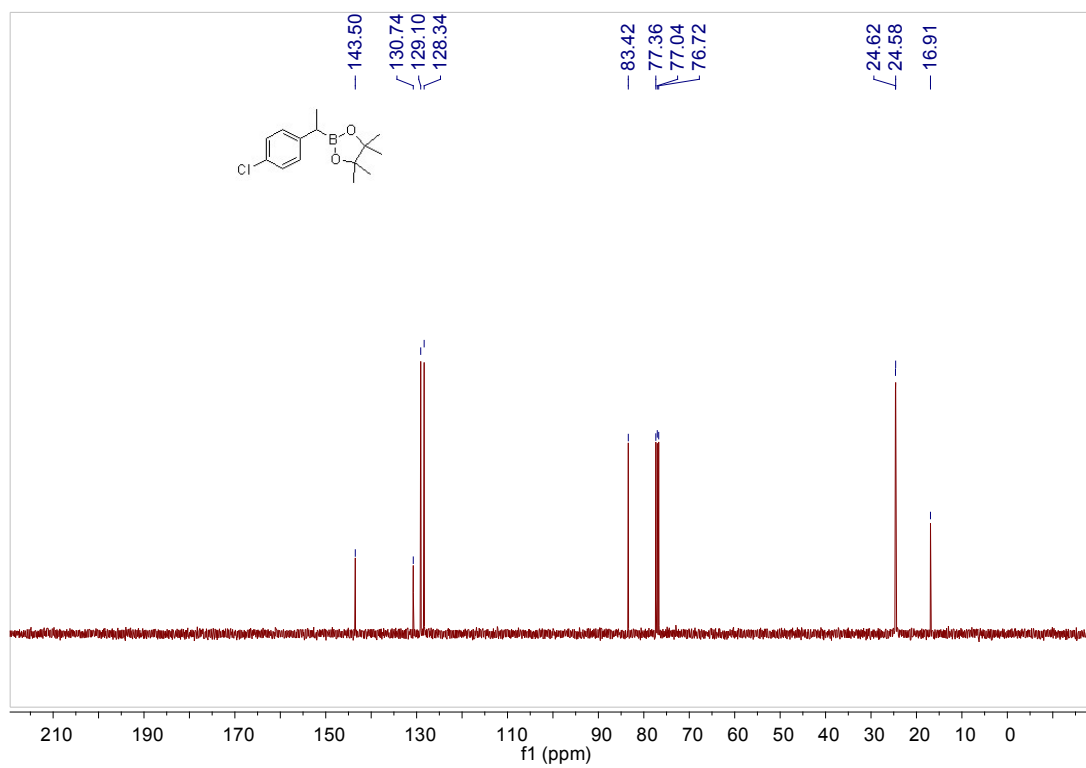



### $^{11}\text{B}$ NMR of compound 2g

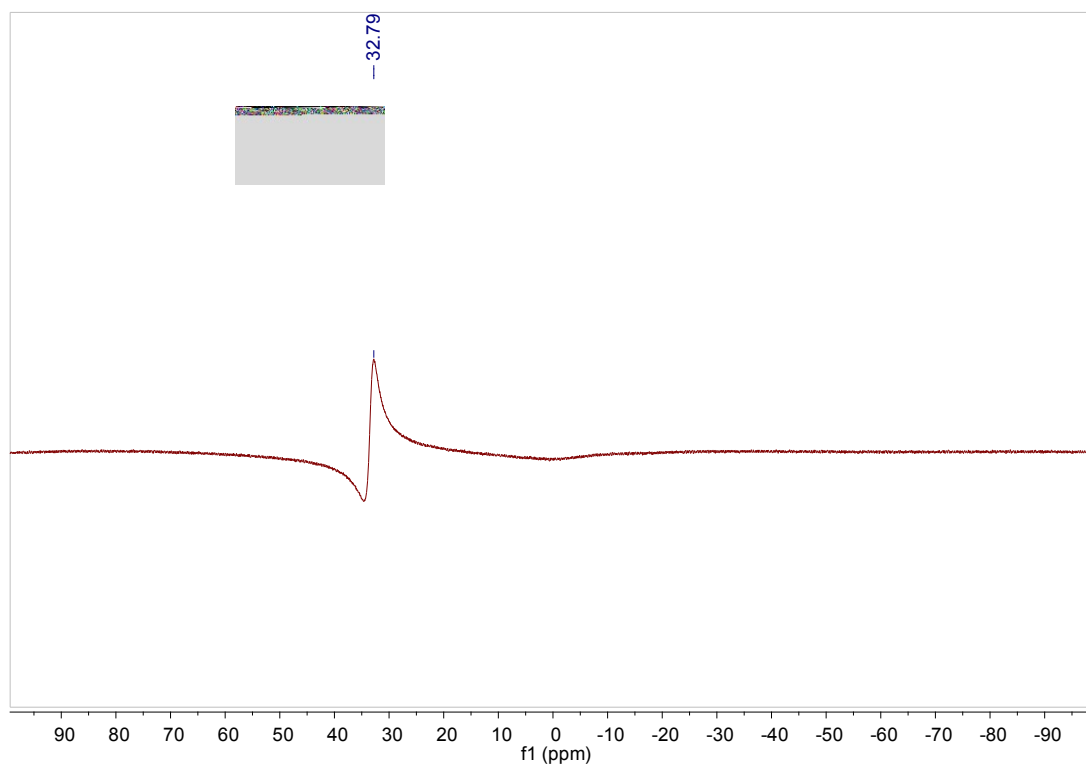

### $^1\text{H}$ NMR of compound 2h

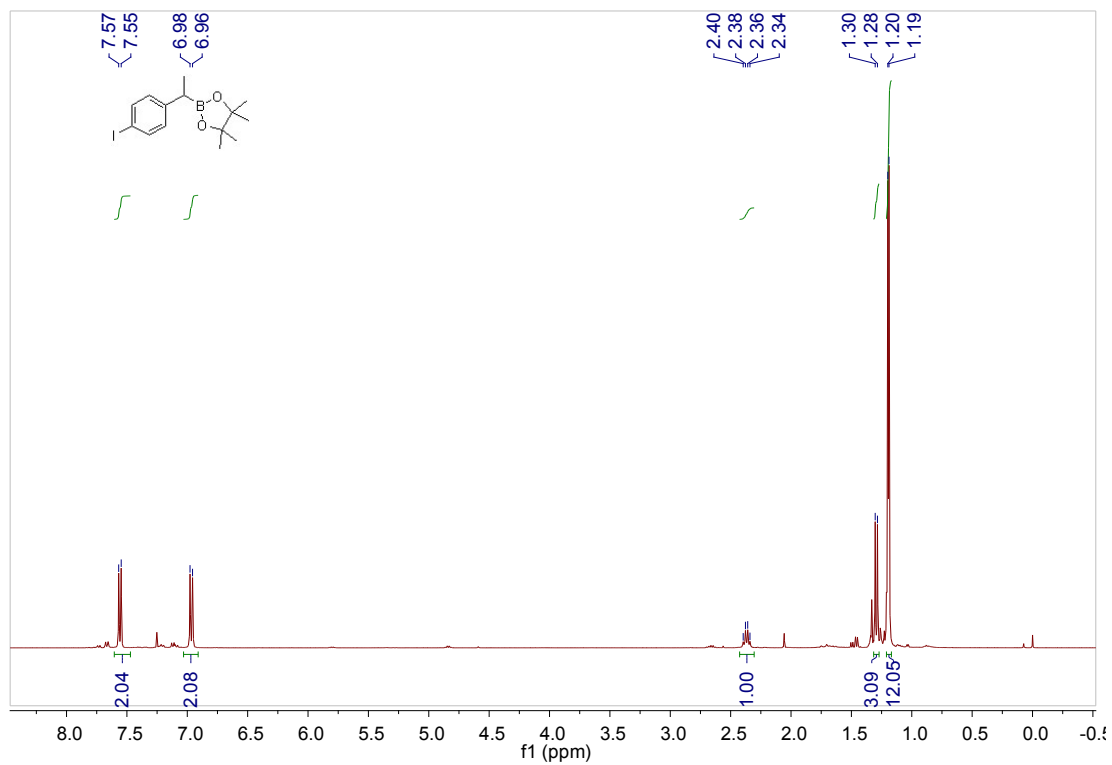

### <sup>13</sup>C NMR of compound 2h

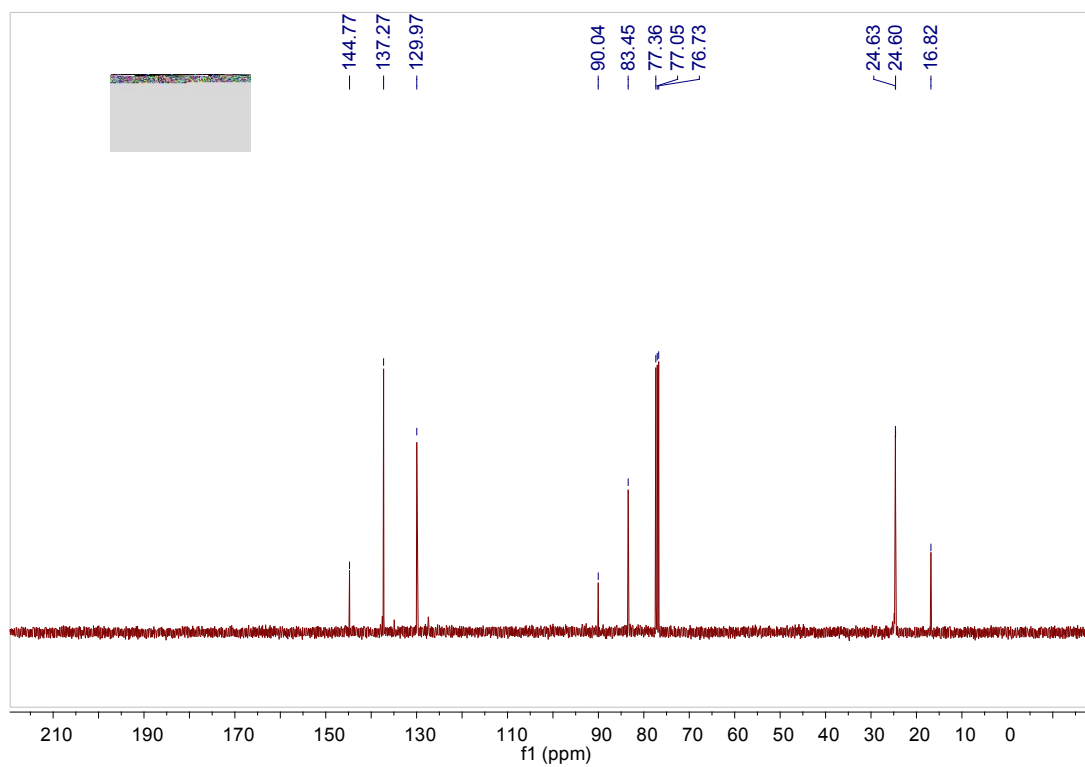

### <sup>11</sup>B NMR of compound 2h

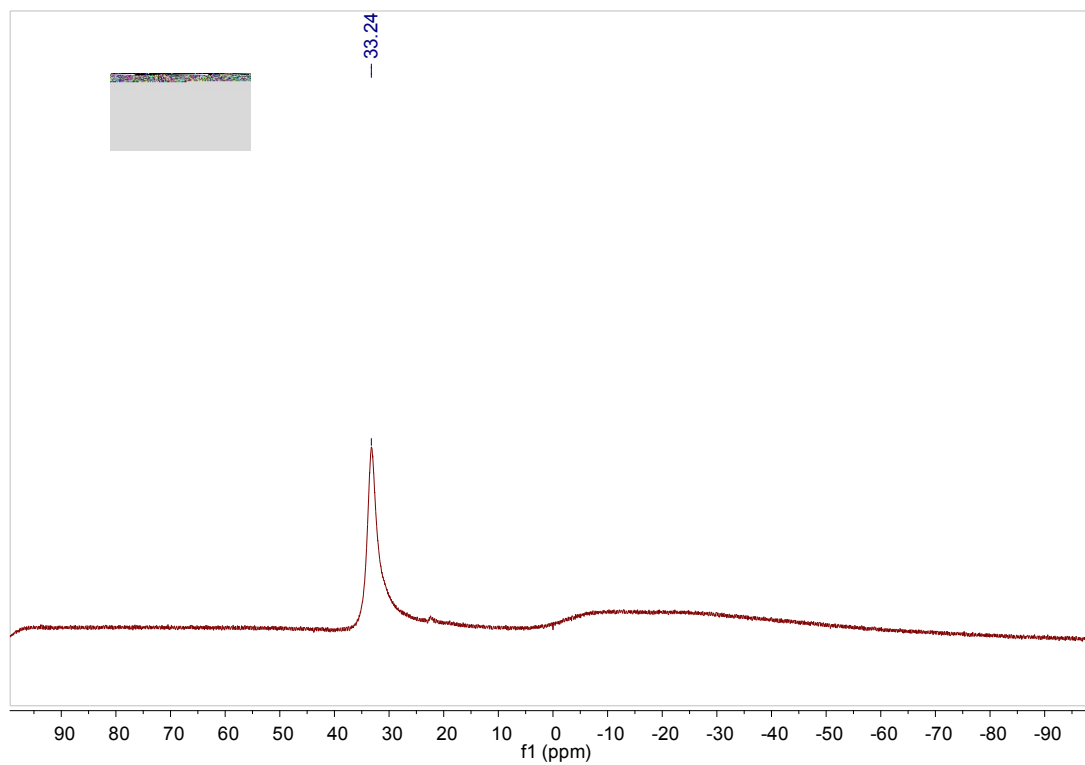

### <sup>1</sup>H NMR of compound 2i

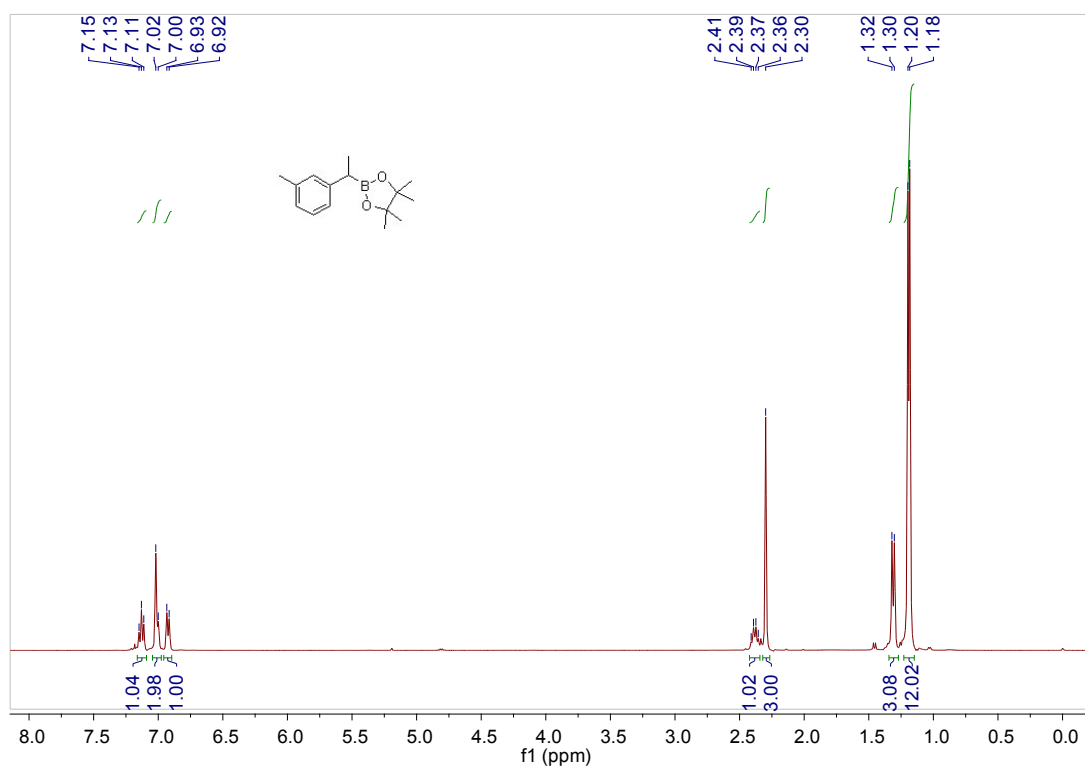

### <sup>13</sup>C NMR of compound 2i

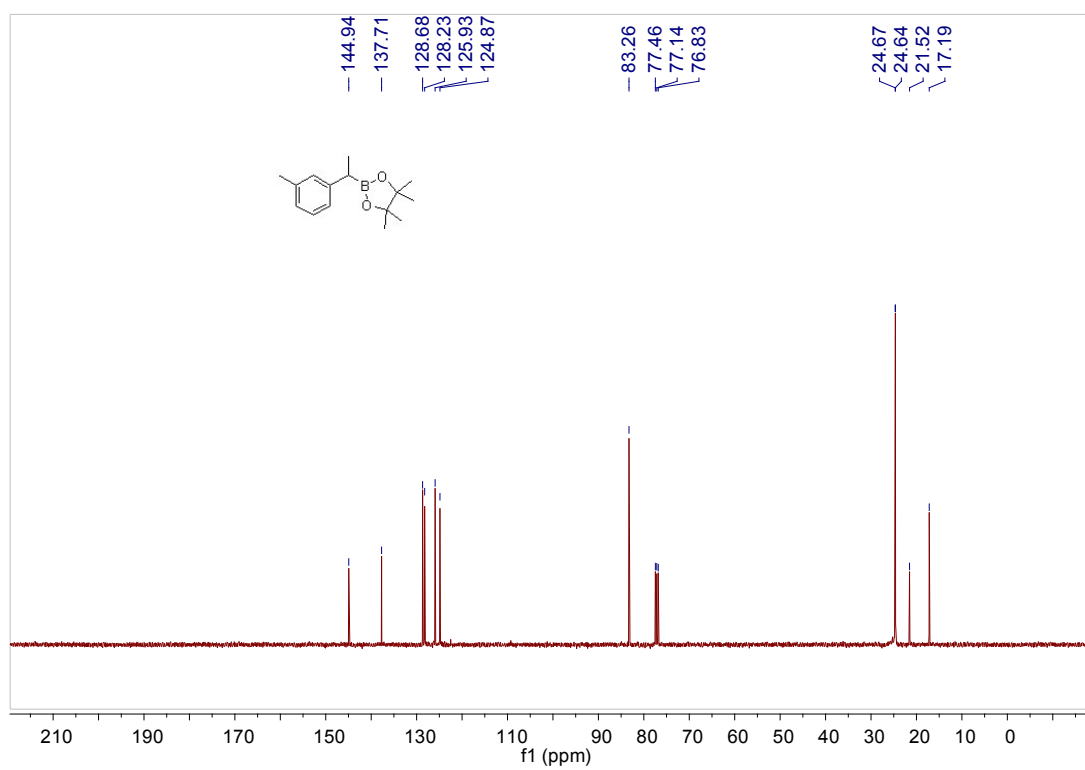

### $^{11}\text{B}$ NMR of compound 2i

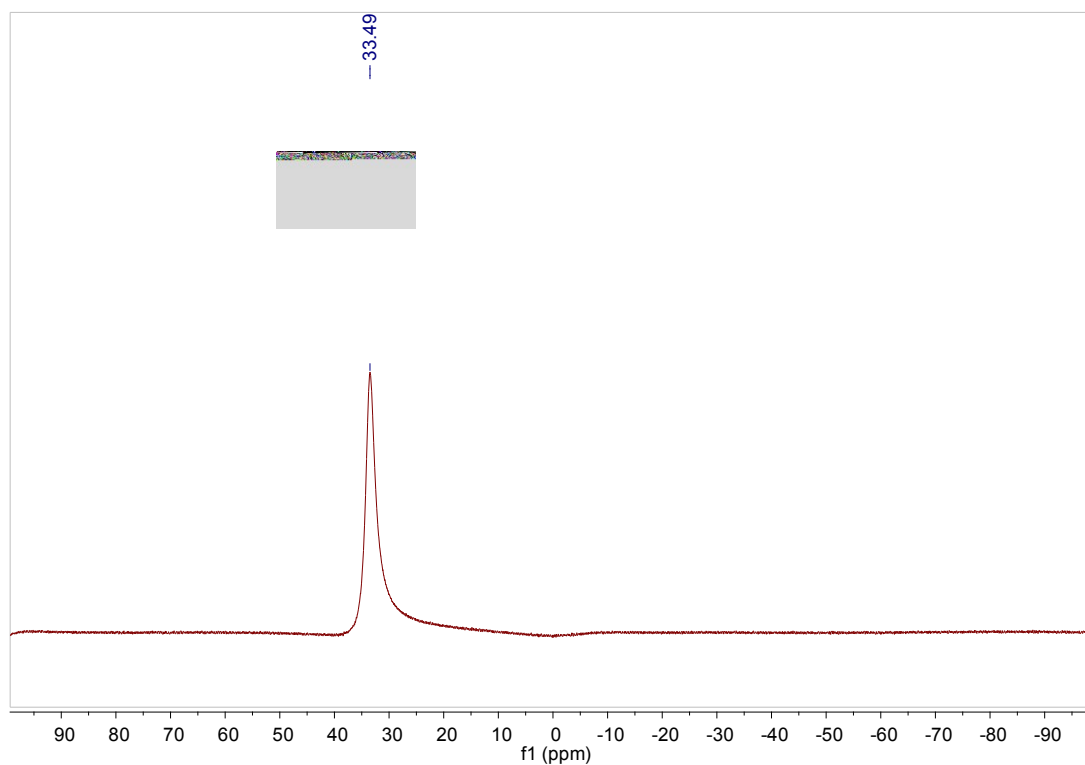

### $^1\text{H}$ NMR of compound 2j

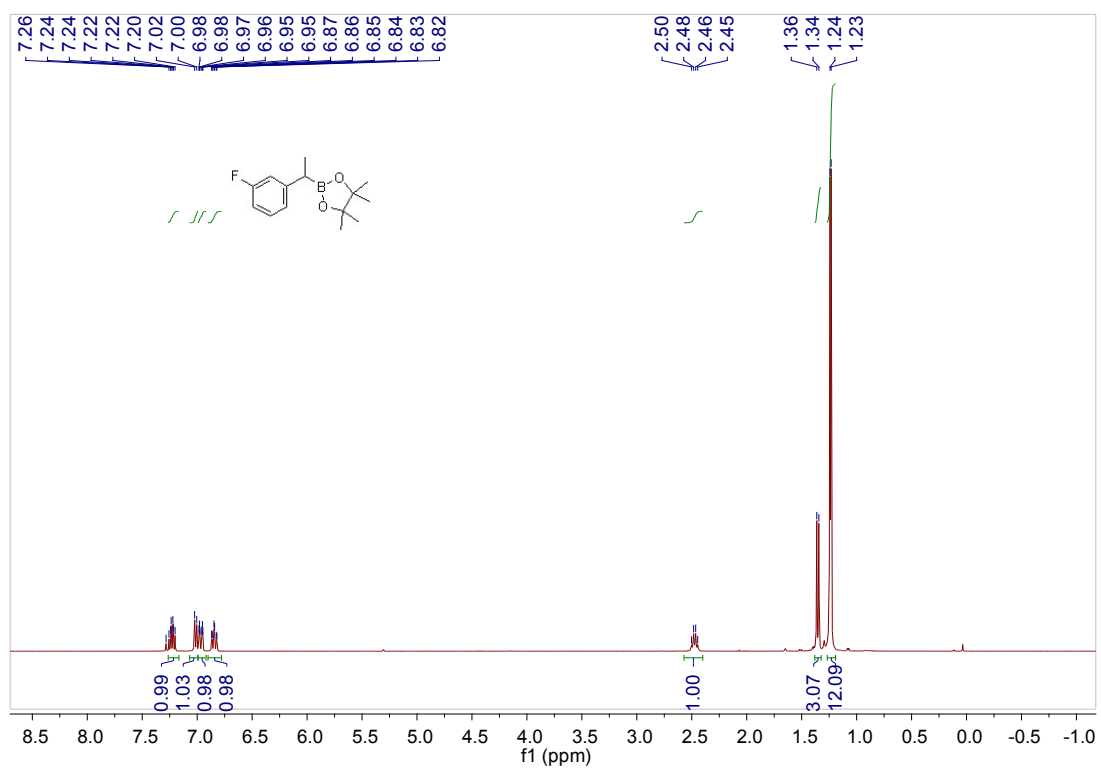

### <sup>13</sup>C NMR of compound 2j

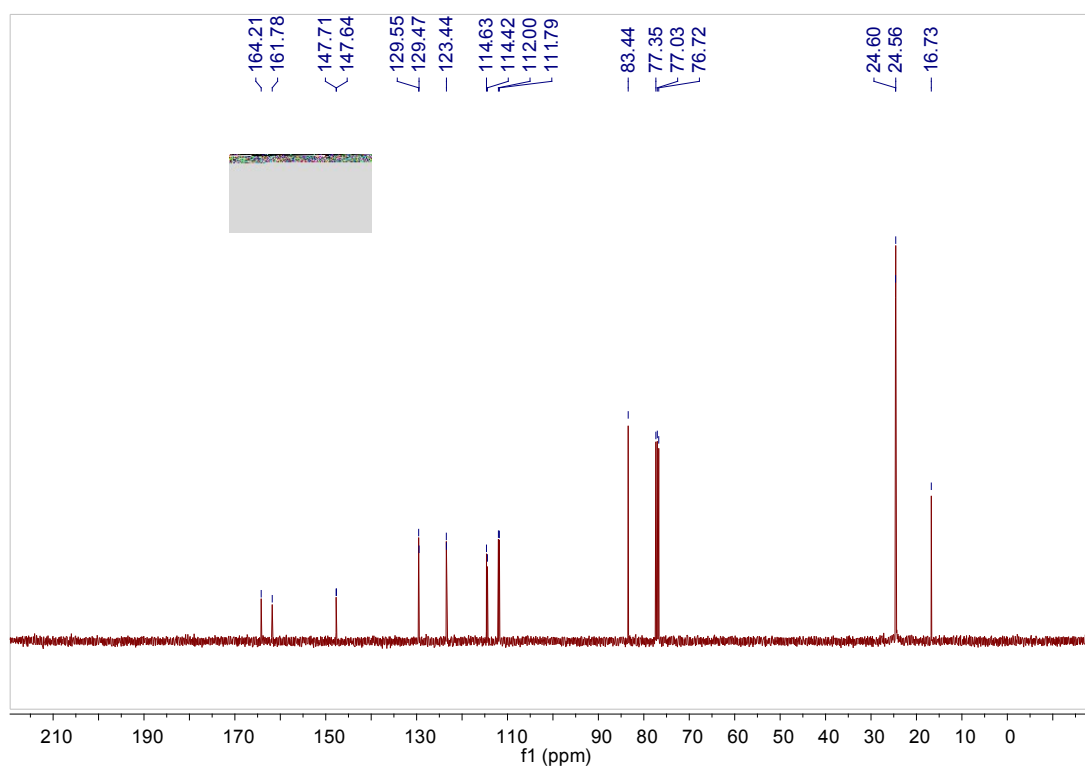

### <sup>11</sup>B NMR of compound 2j

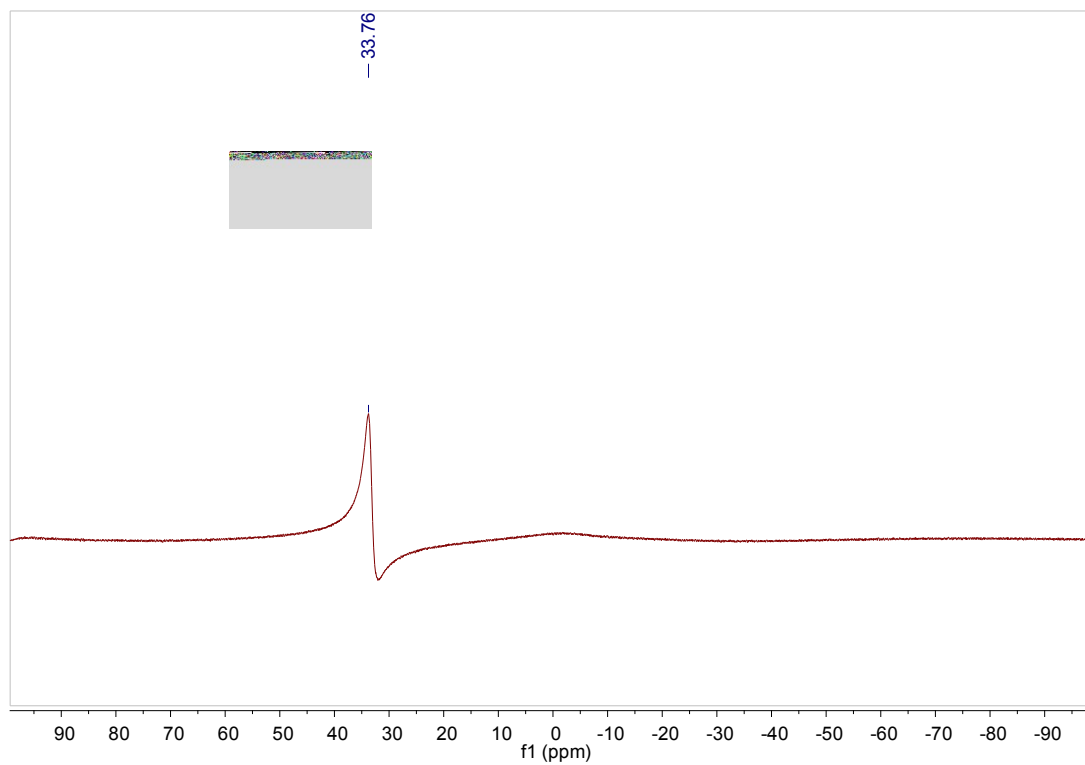

### <sup>1</sup>H NMR of compound 2k

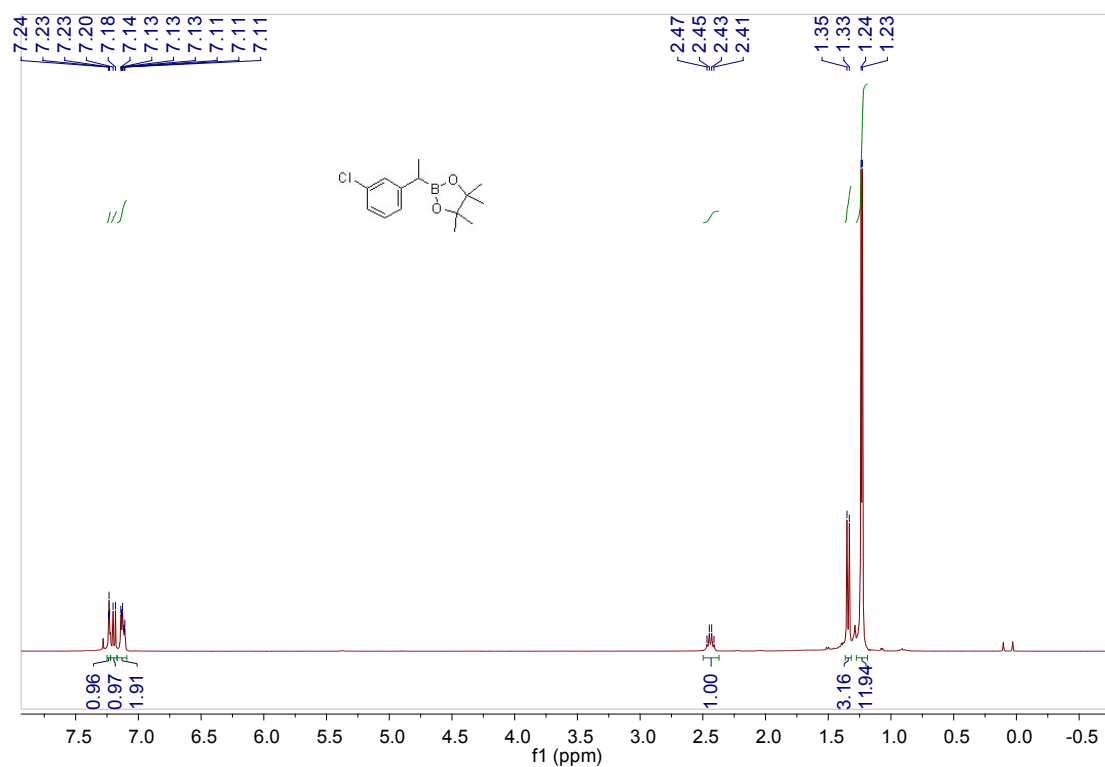

### <sup>13</sup>C NMR of compound 2k

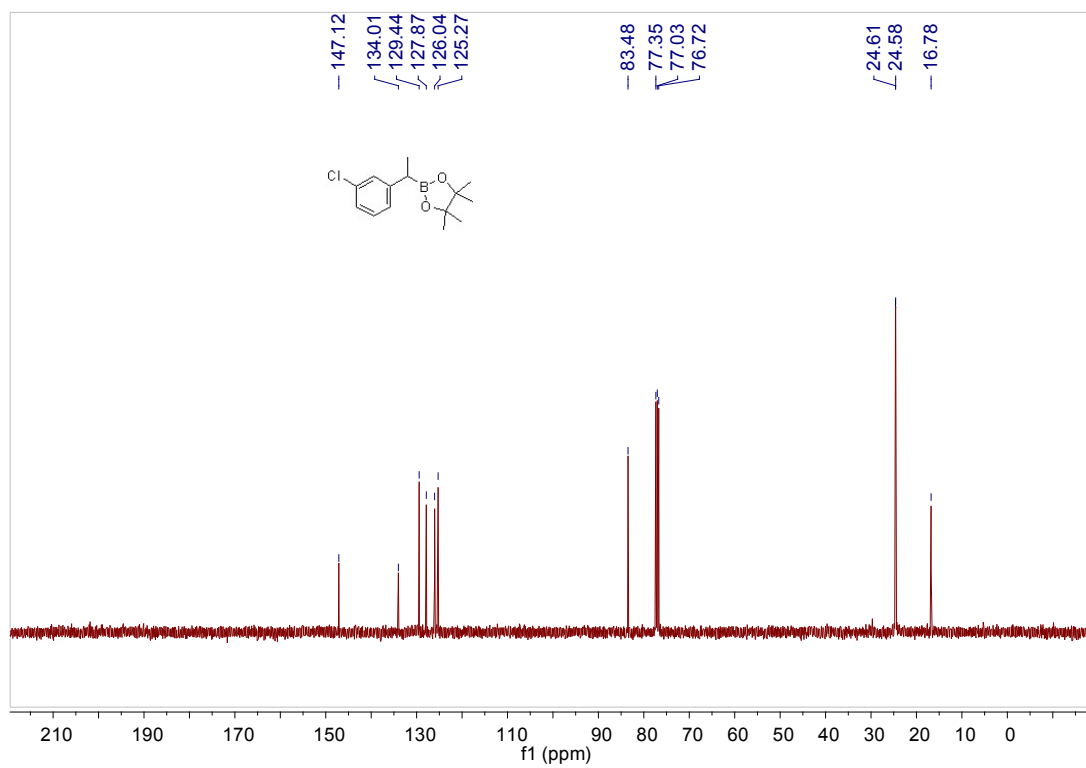

### <sup>11</sup>B NMR of compound 2k

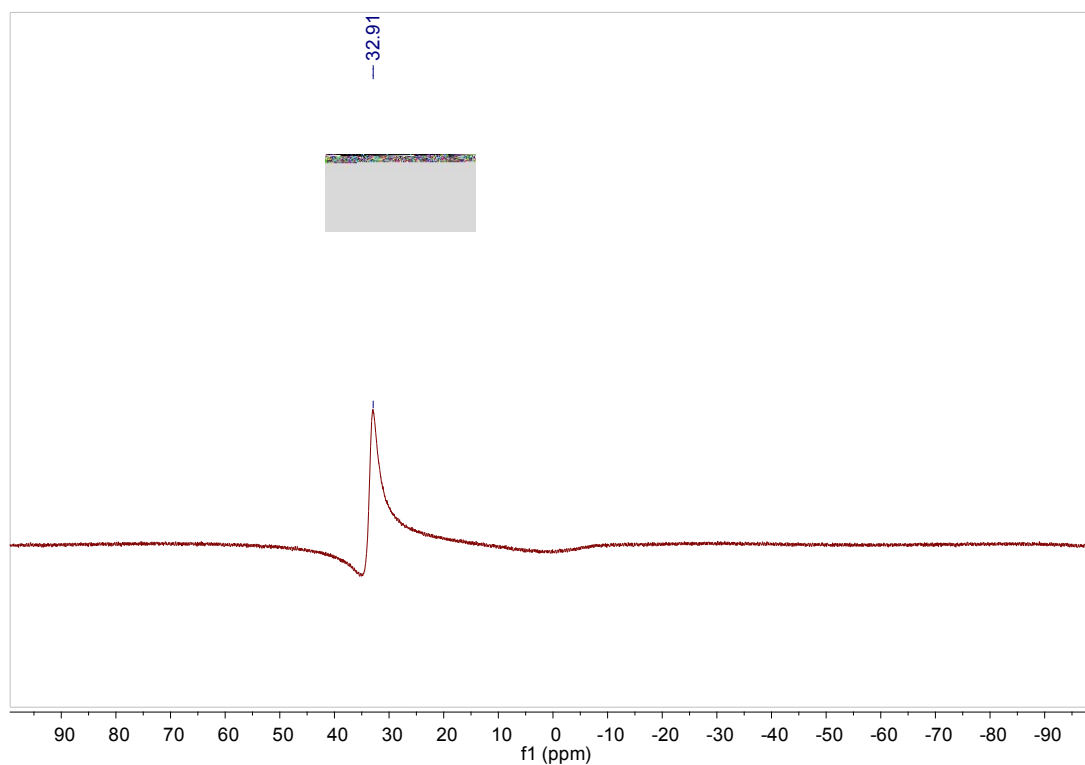

### <sup>1</sup>H NMR of compound 2l

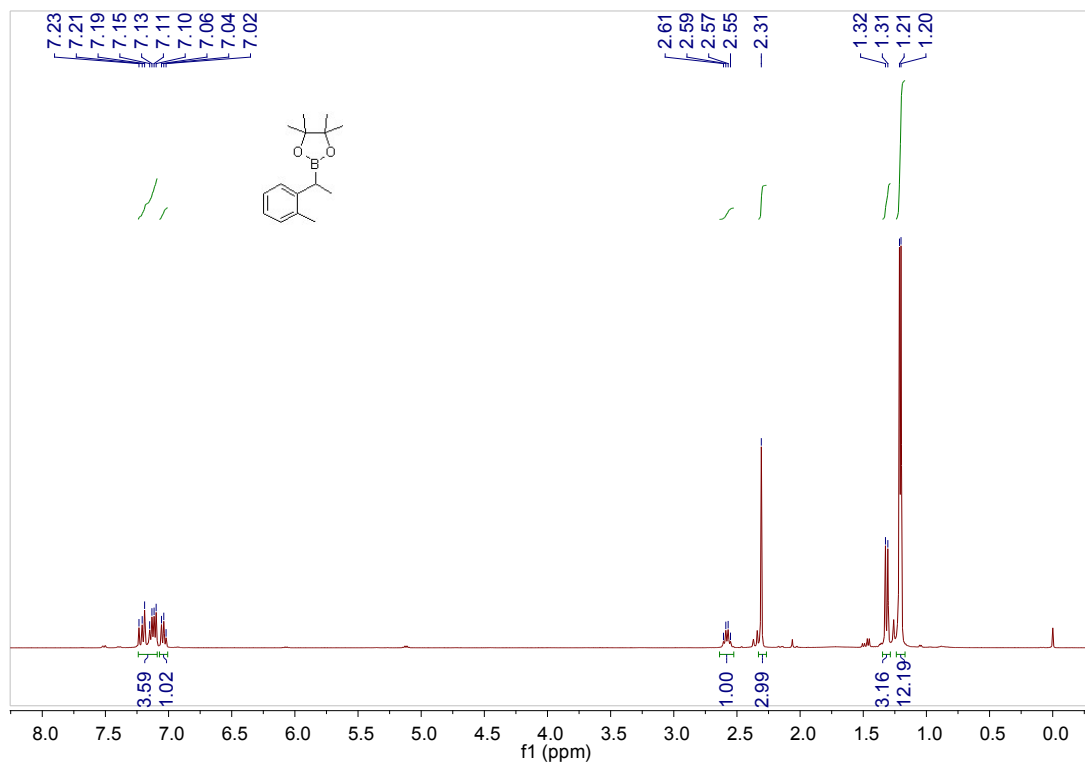

### <sup>13</sup>C NMR of compound 21

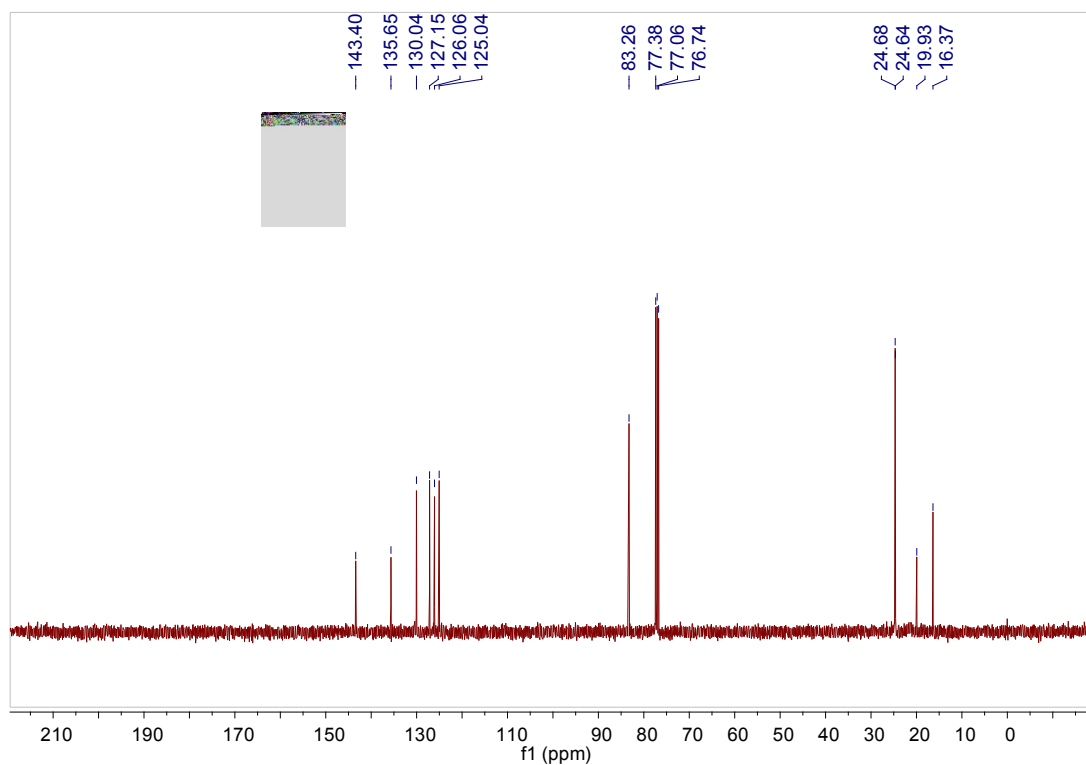

### <sup>11</sup>B NMR of compound 21

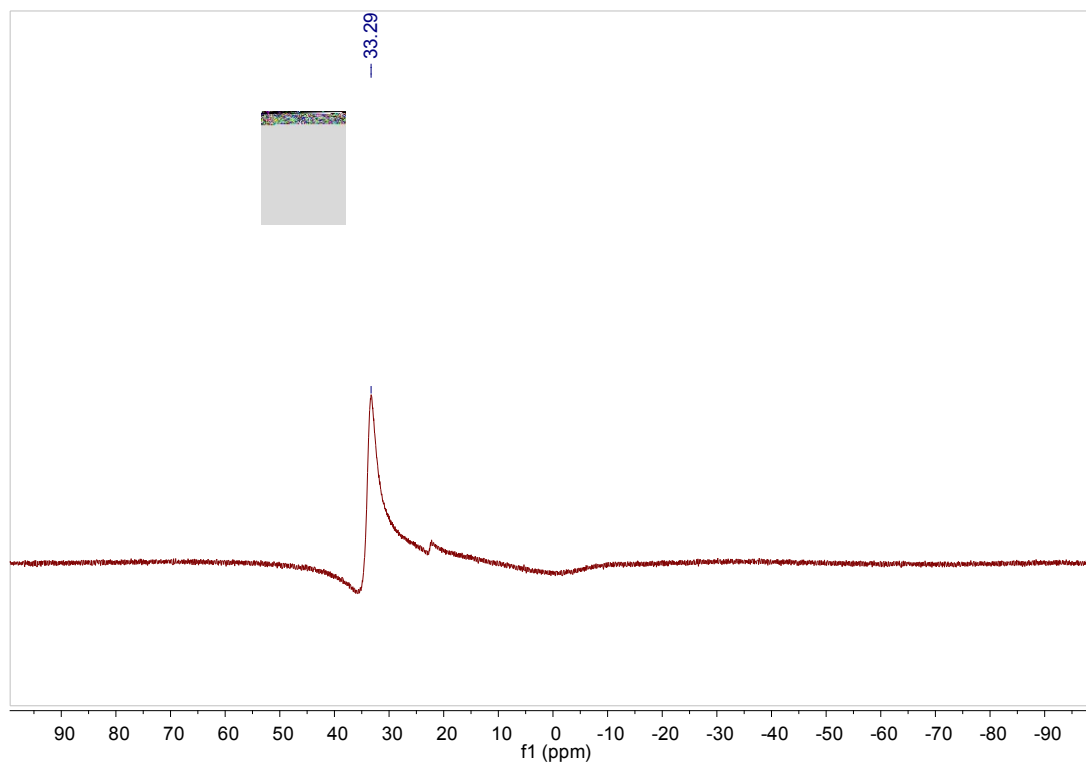



### <sup>1</sup>H NMR of compound 2m

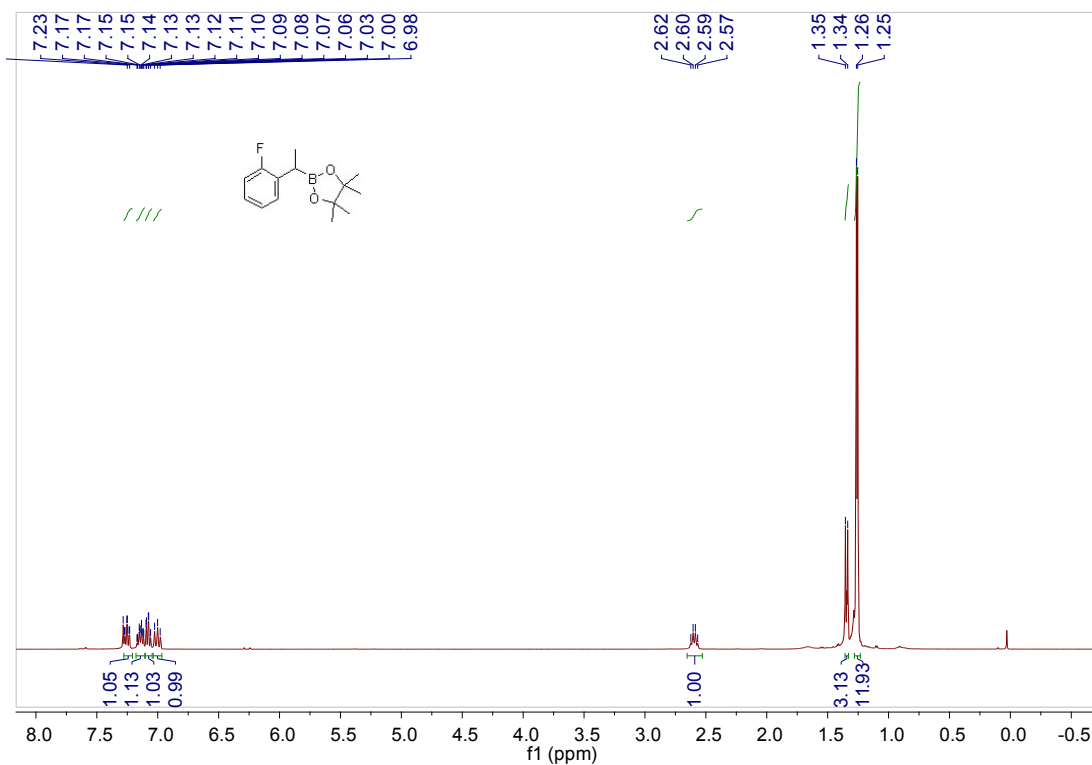

### <sup>13</sup>C NMR of compound 2m

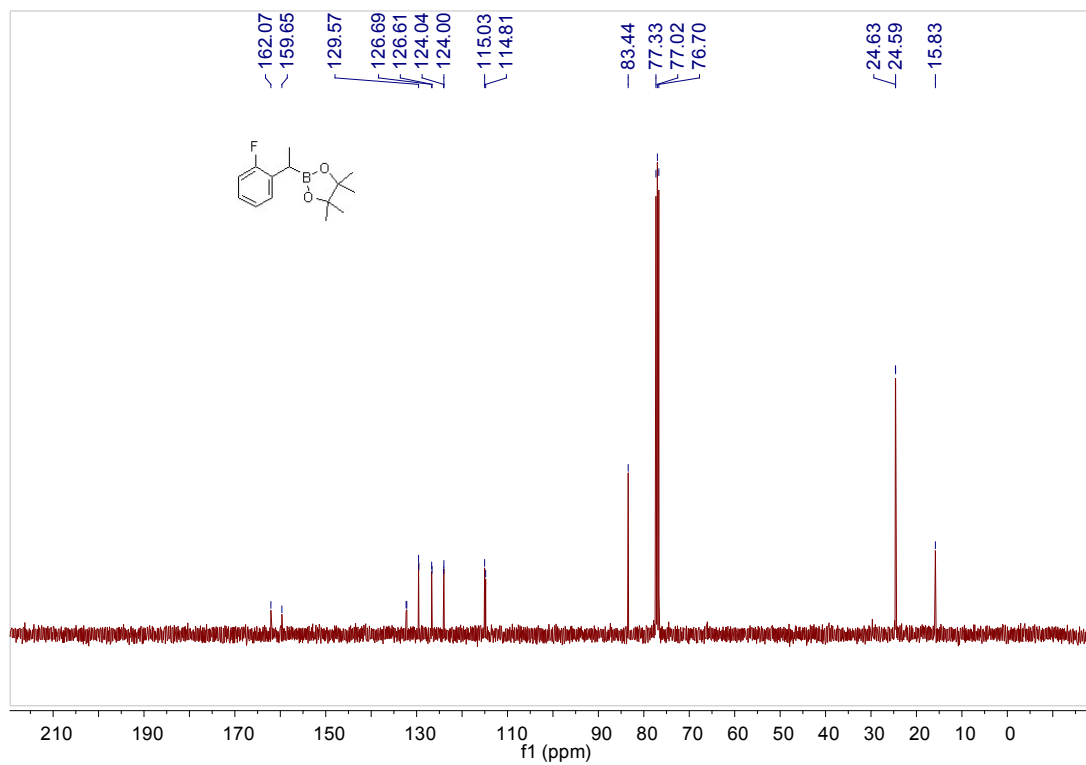

### $^{11}\text{B}$ NMR of compound 2m

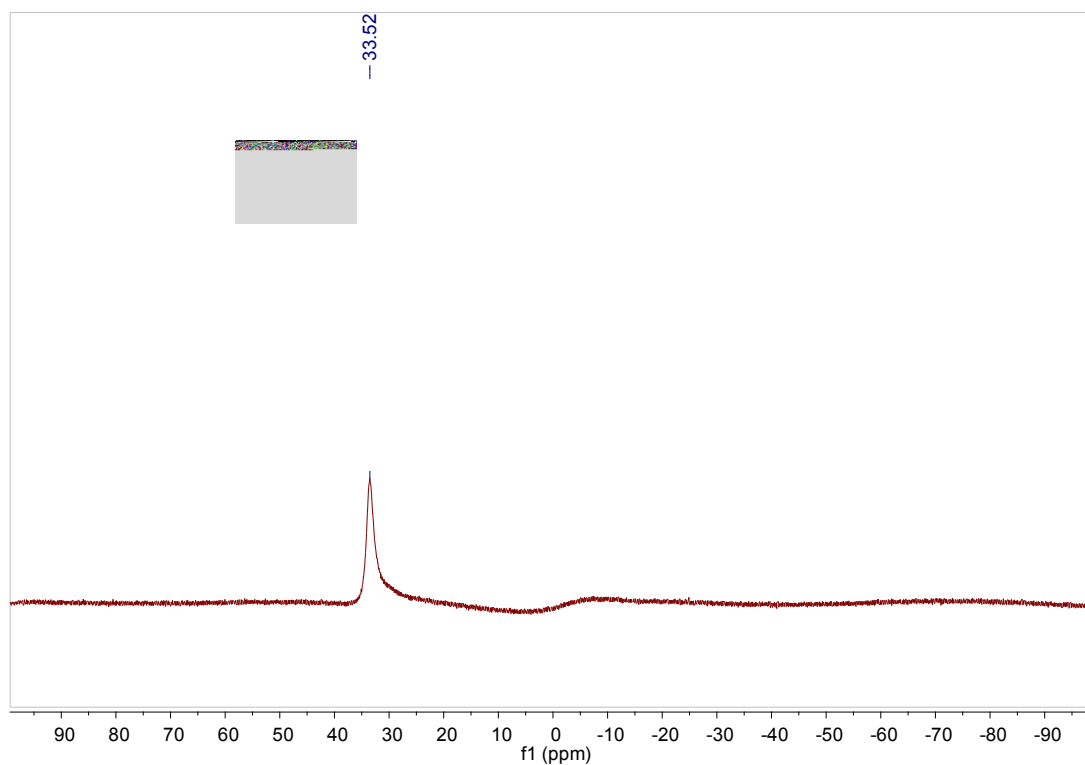

### $^1\text{H}$ NMR of compound 2n

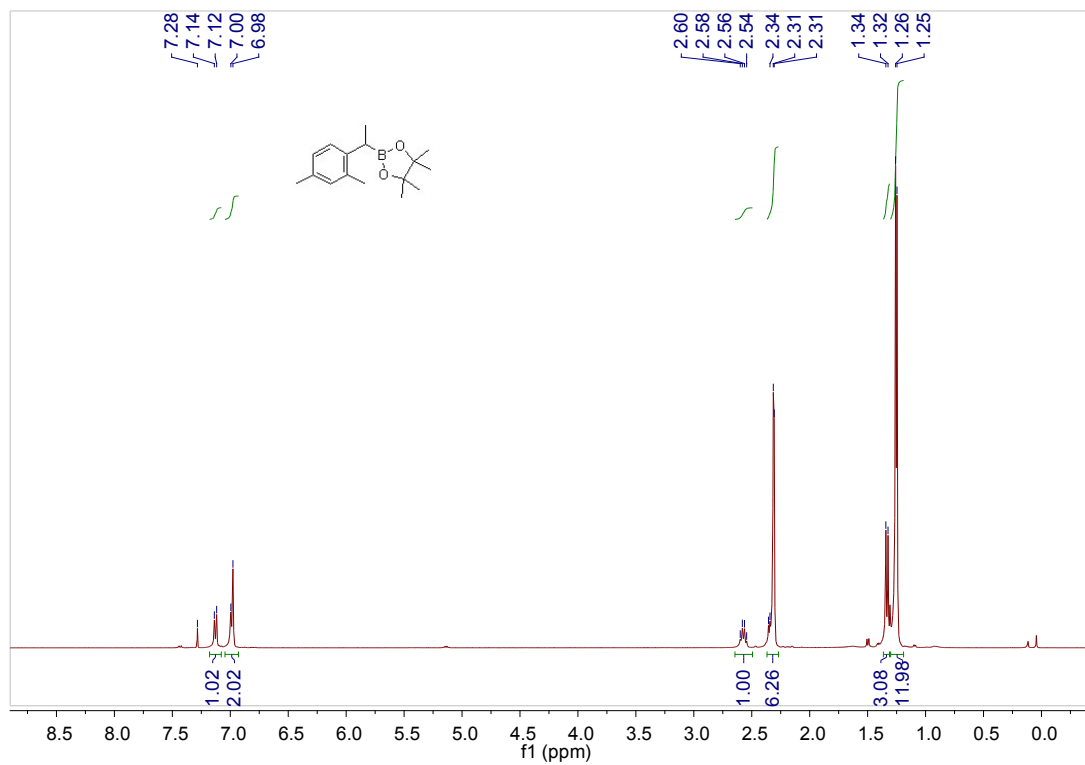

### <sup>13</sup>C NMR of compound 2n

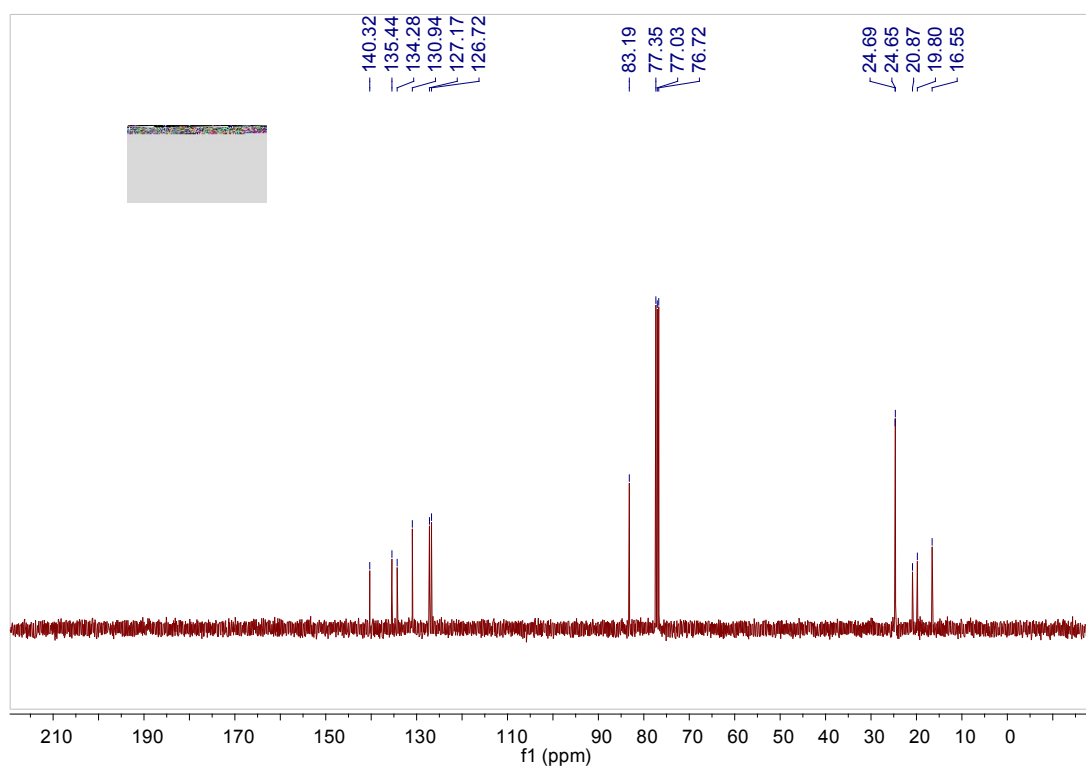

### <sup>11</sup>B NMR of compound 2n

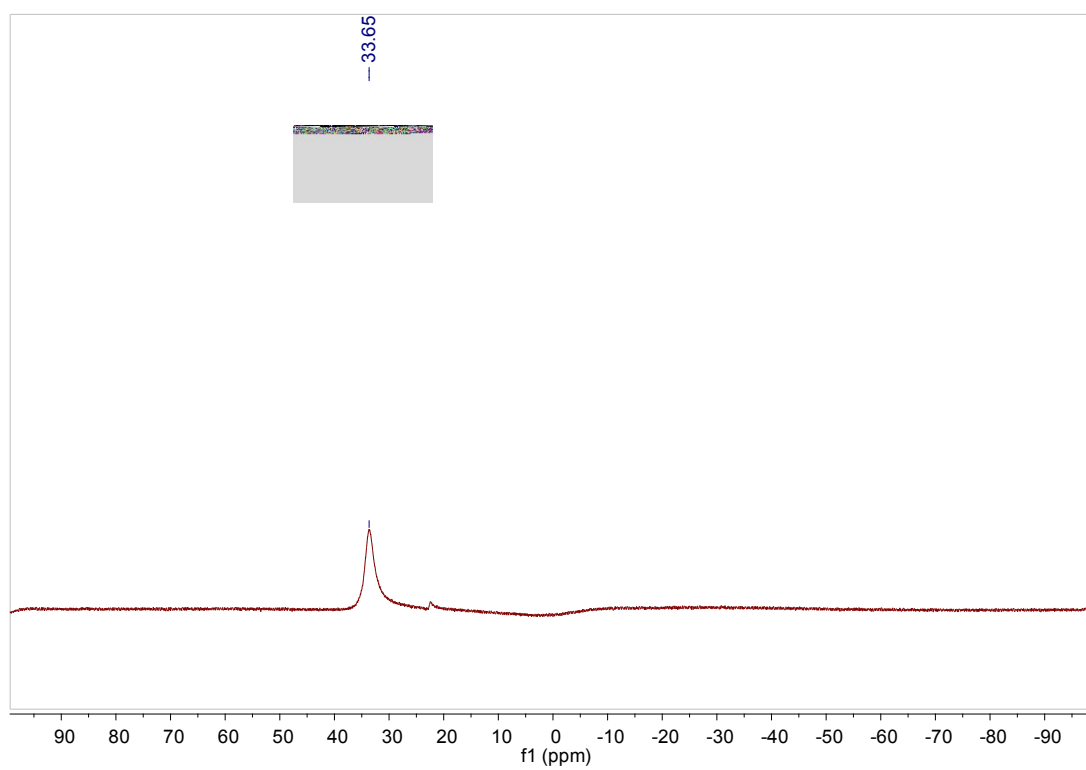

### <sup>1</sup>H NMR of compound 2o

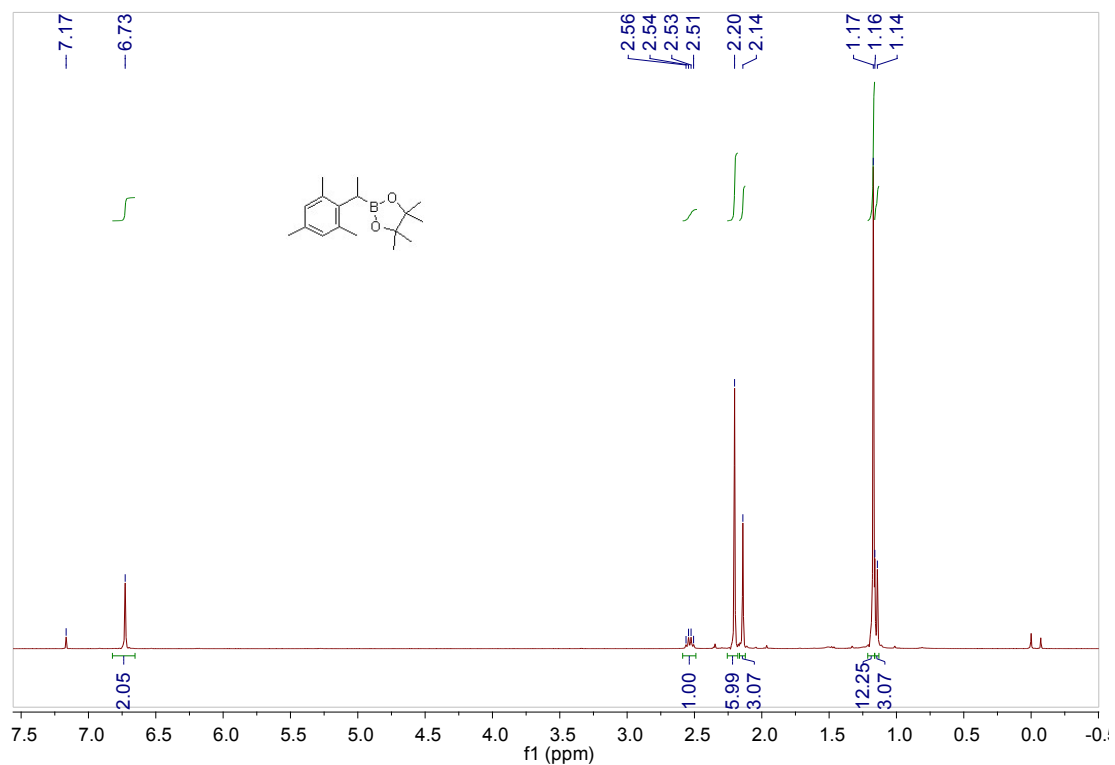

### <sup>13</sup>C NMR of compound 2o

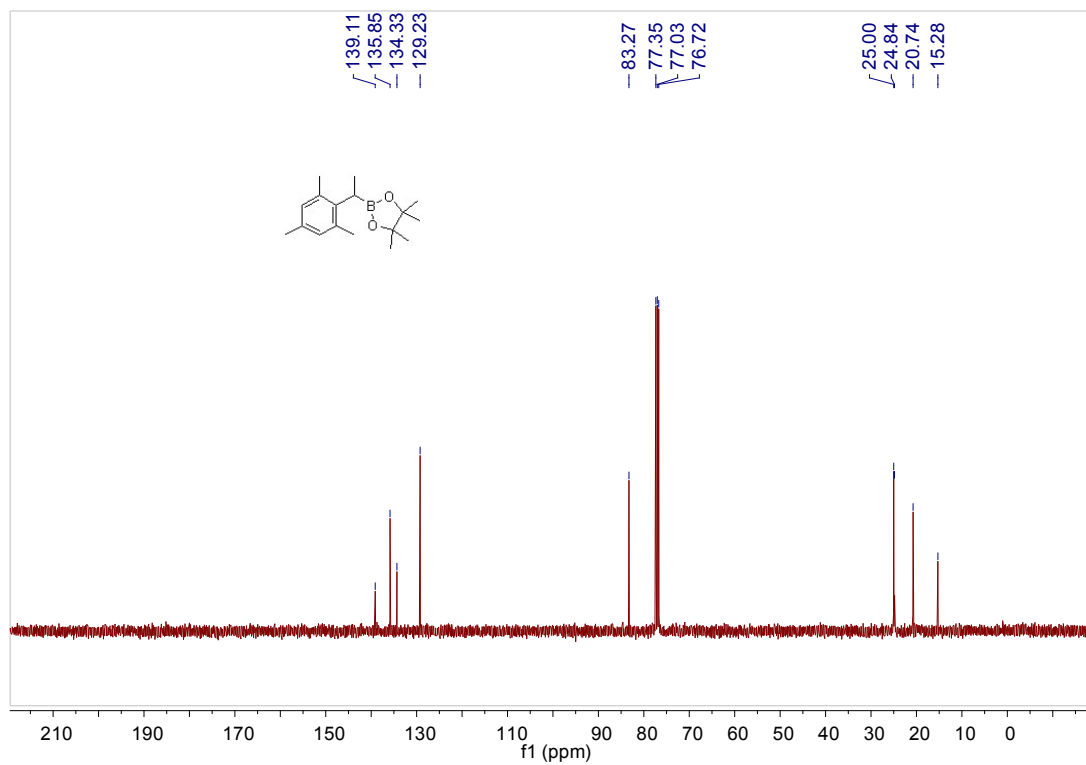

### $^{11}\text{B}$ NMR of compound 2o

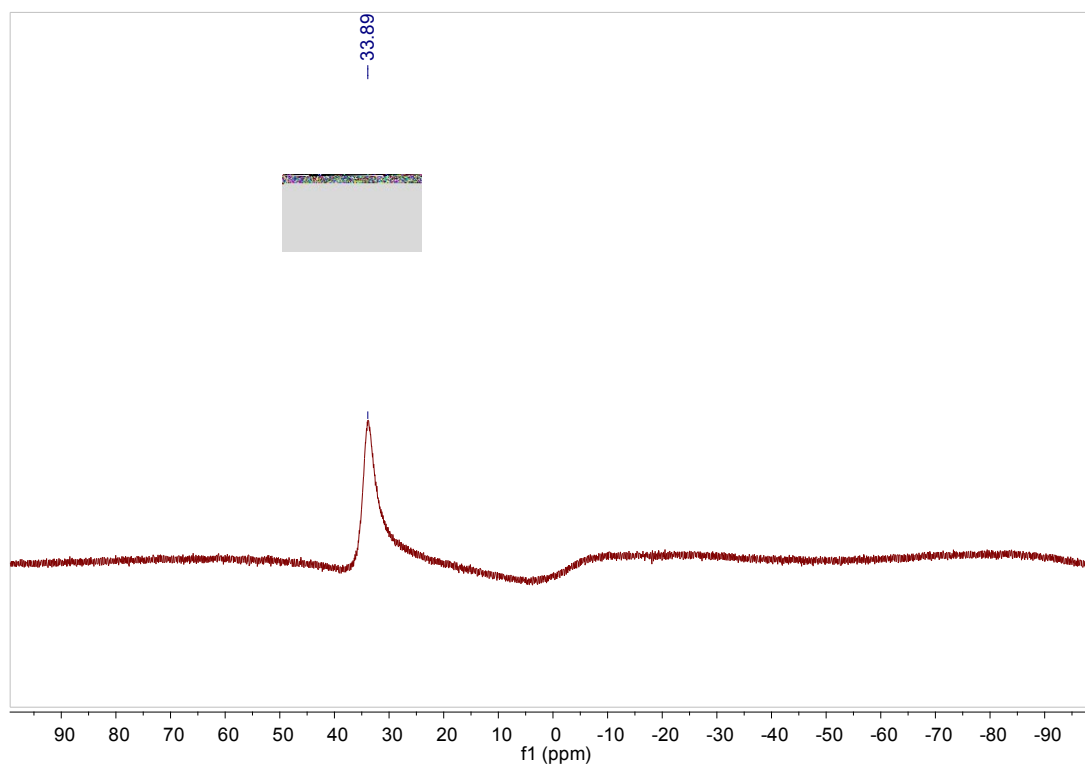

### $^1\text{H}$ NMR of compound 2p

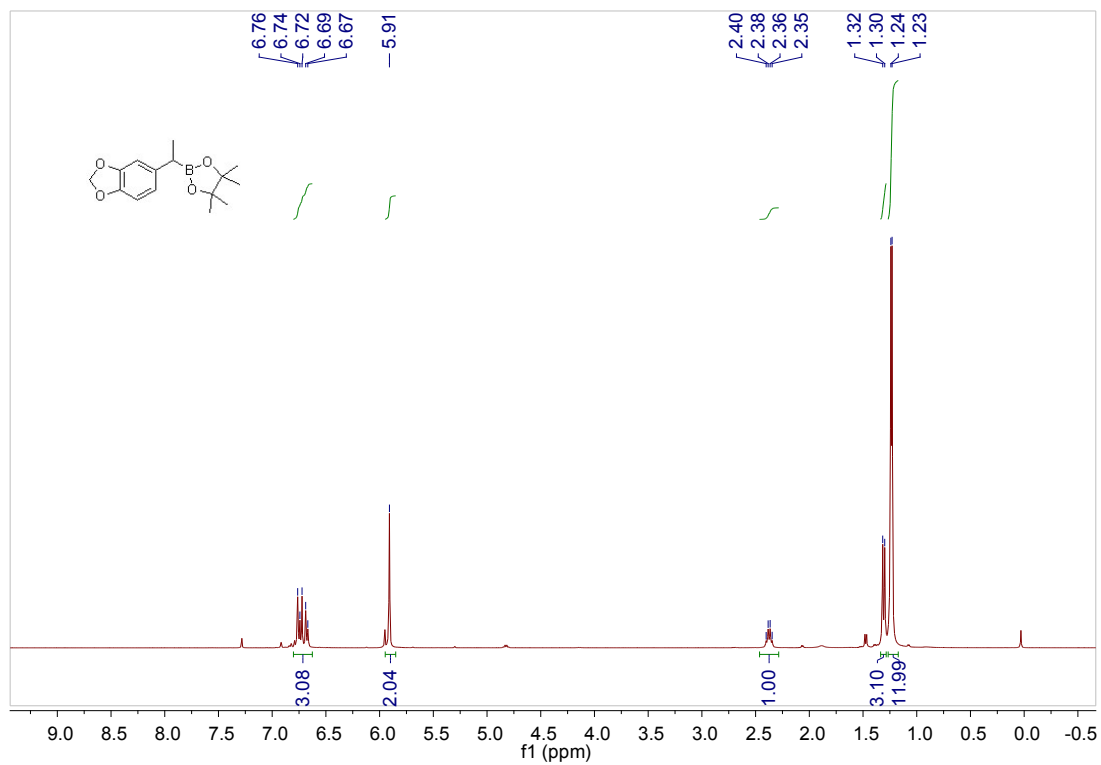

### <sup>13</sup>C NMR of compound 2p

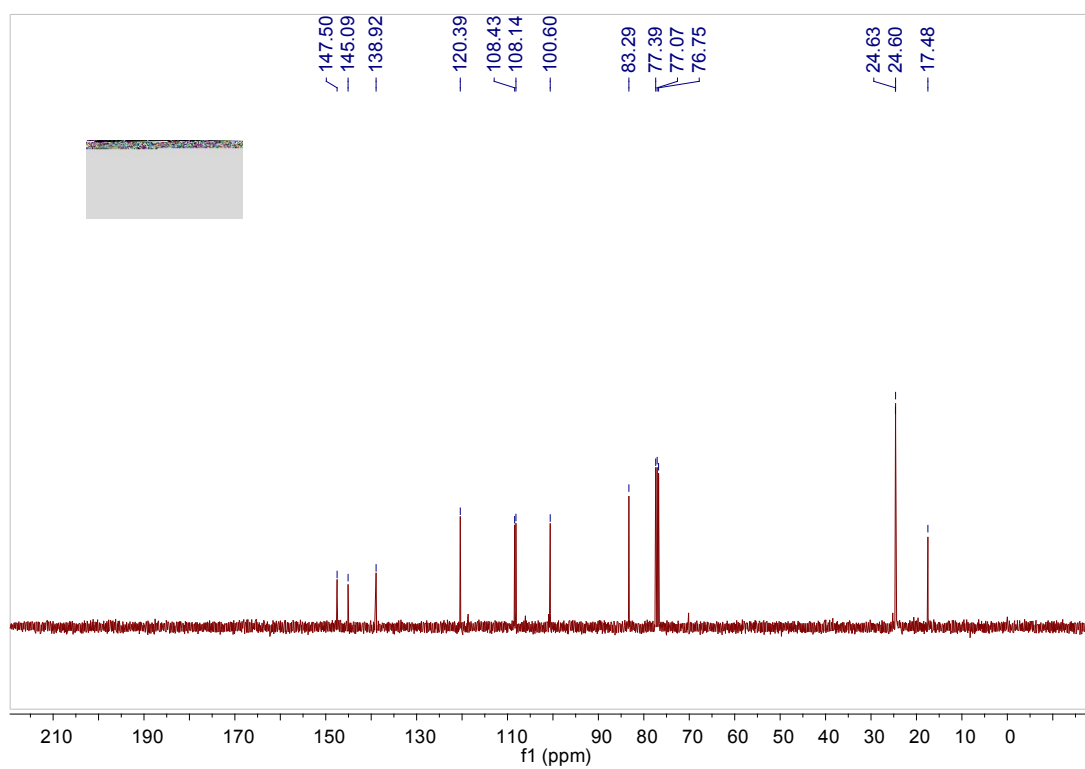

### <sup>11</sup>B NMR of compound 2p

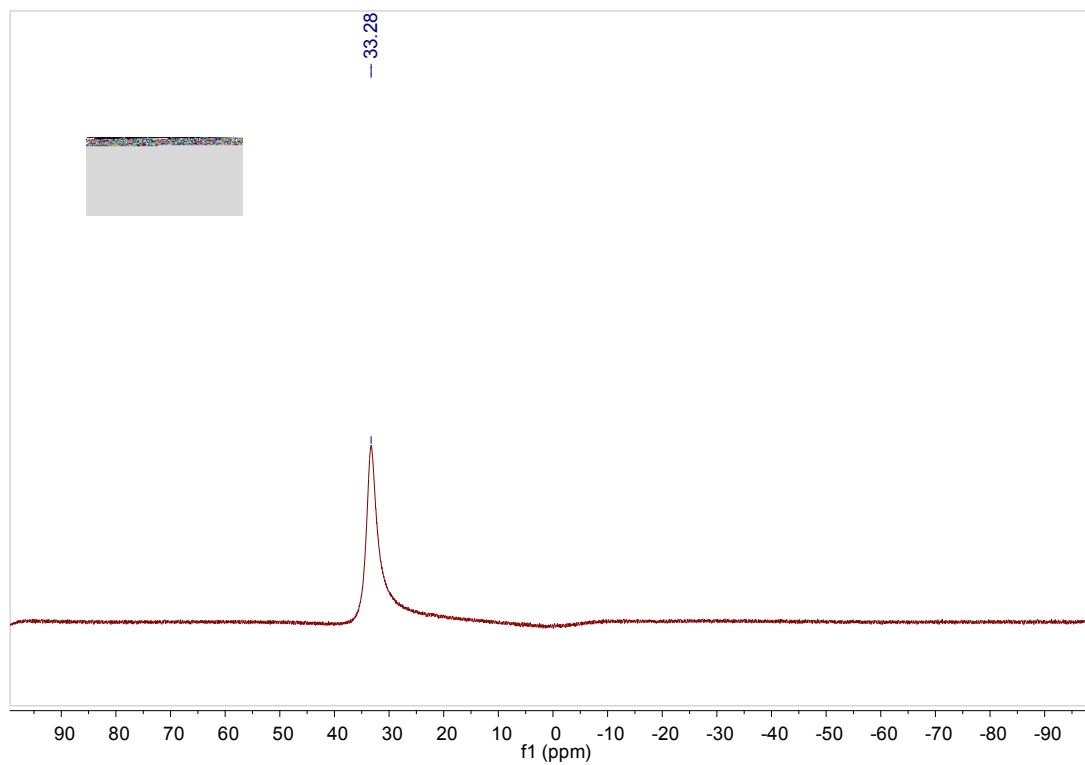

### <sup>1</sup>H NMR of compound 2q

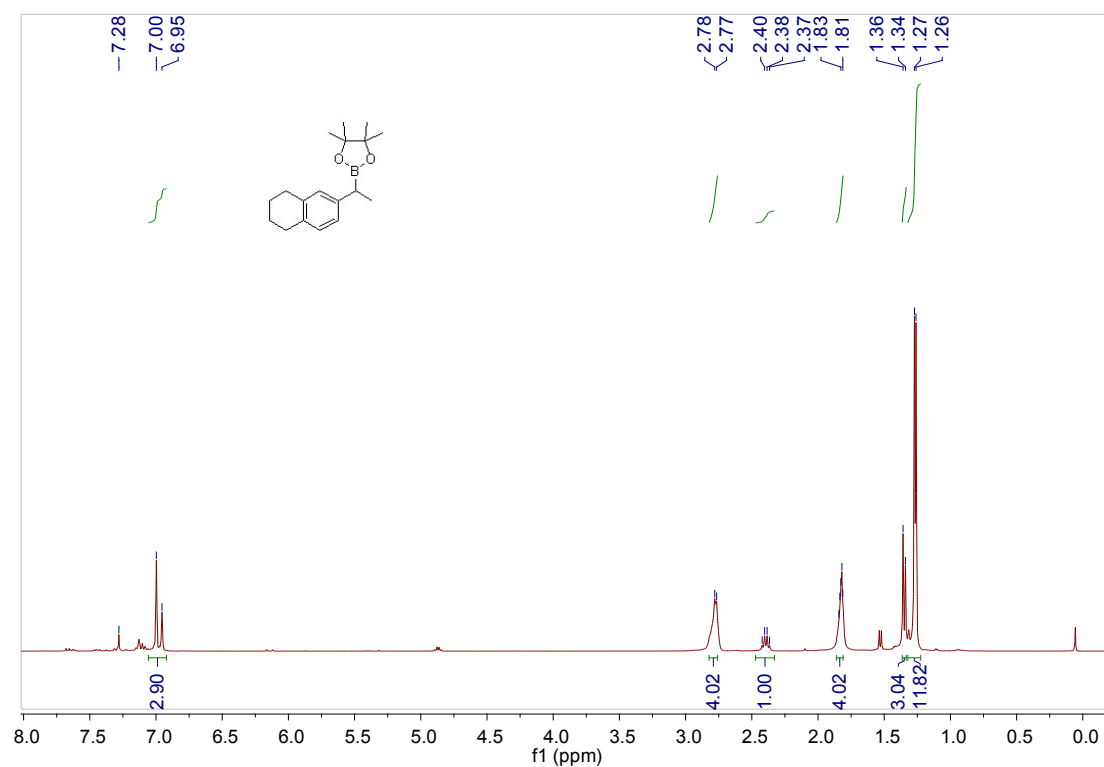

### <sup>13</sup>C NMR of compound 2q

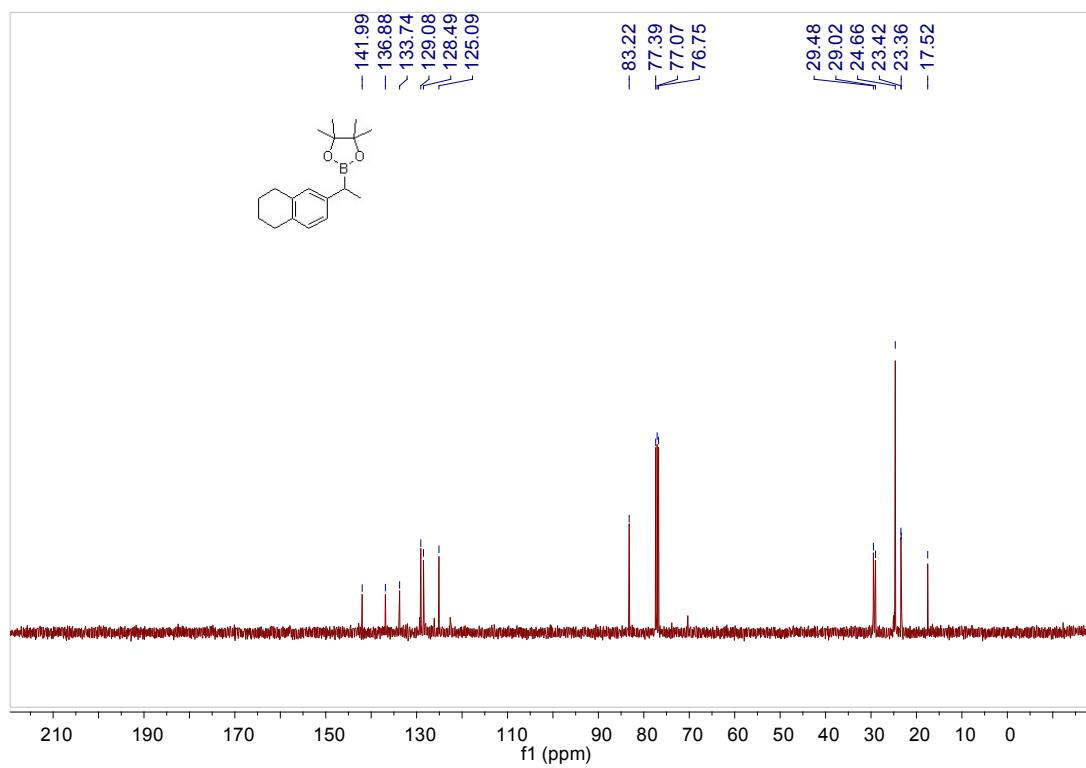

### $^{11}\text{B}$ NMR of compound 2q

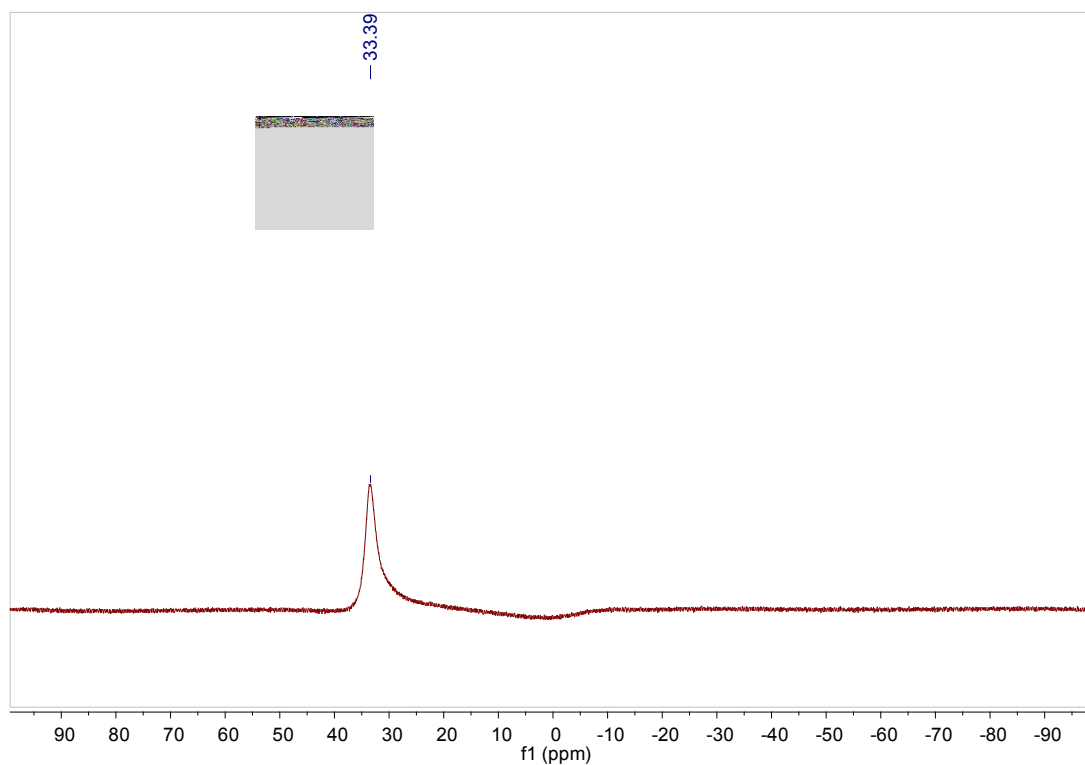

### $^1\text{H}$ NMR of compound 2r

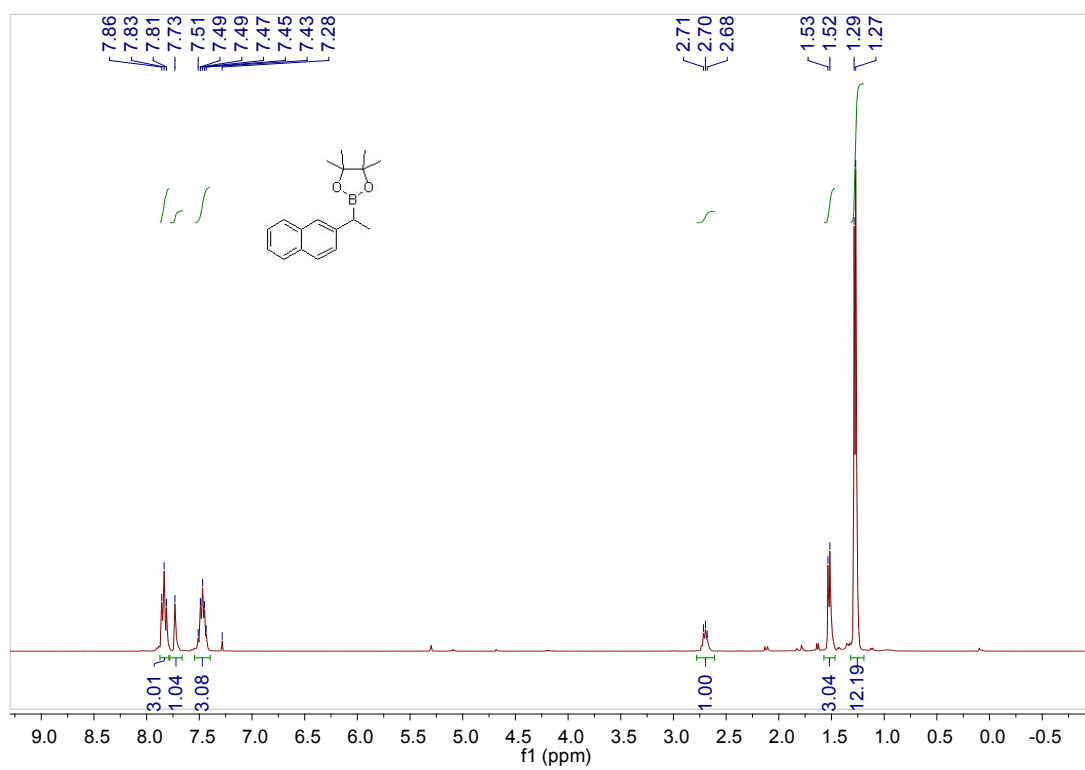



### <sup>13</sup>C NMR of compound 2r

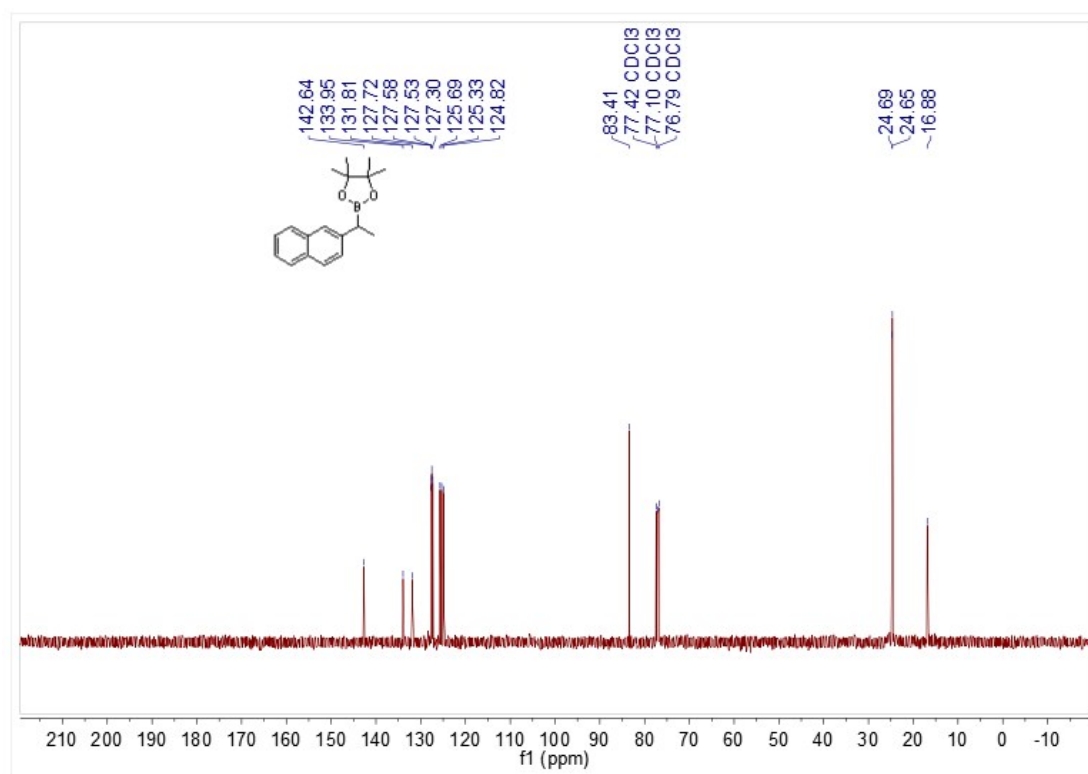

### <sup>11</sup>B NMR of compound 2r

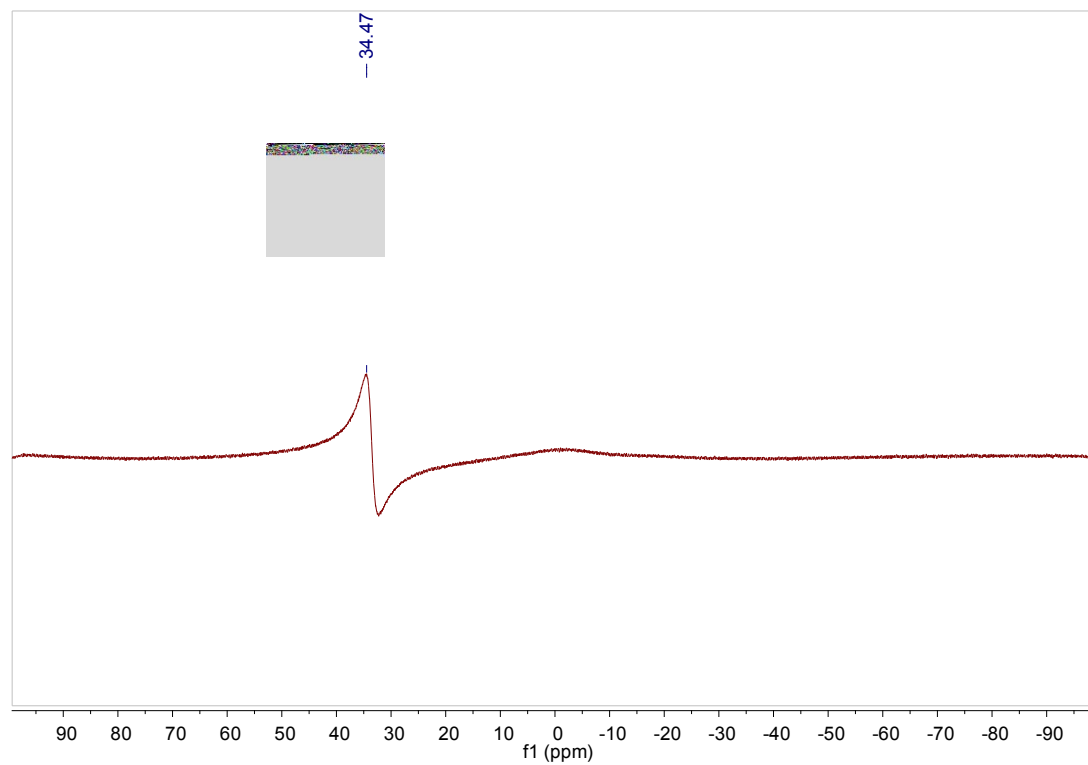

### <sup>1</sup>H NMR of compound 2s

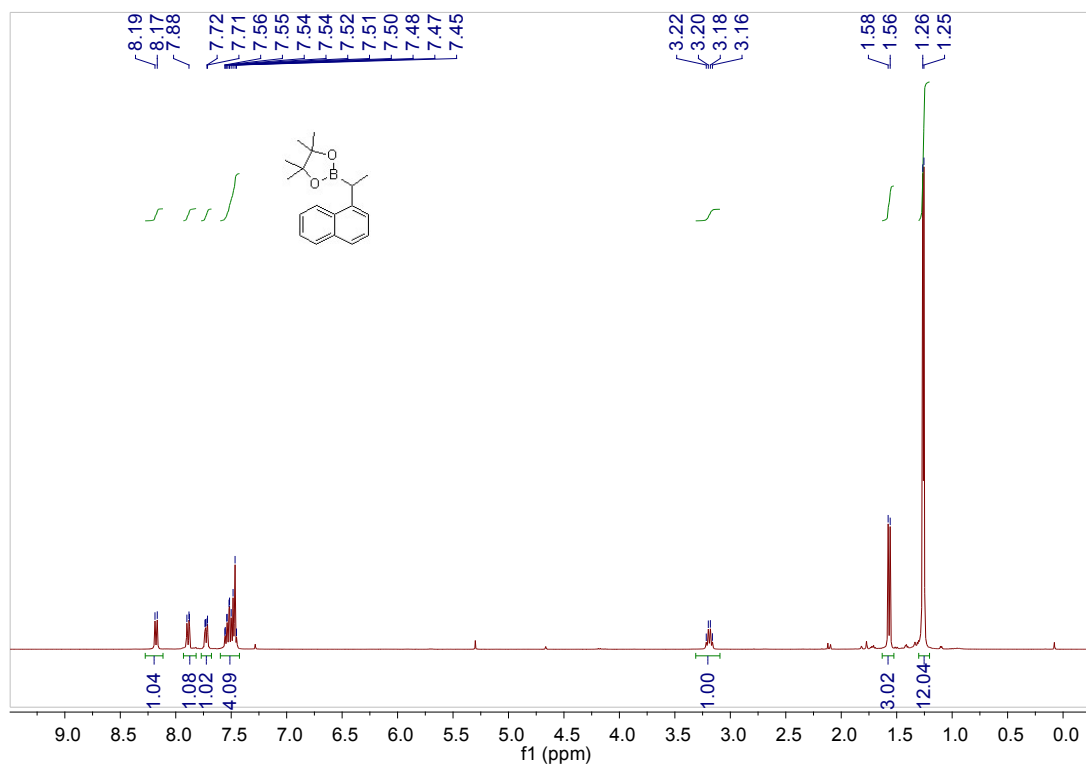

### <sup>13</sup>C NMR of compound 2s

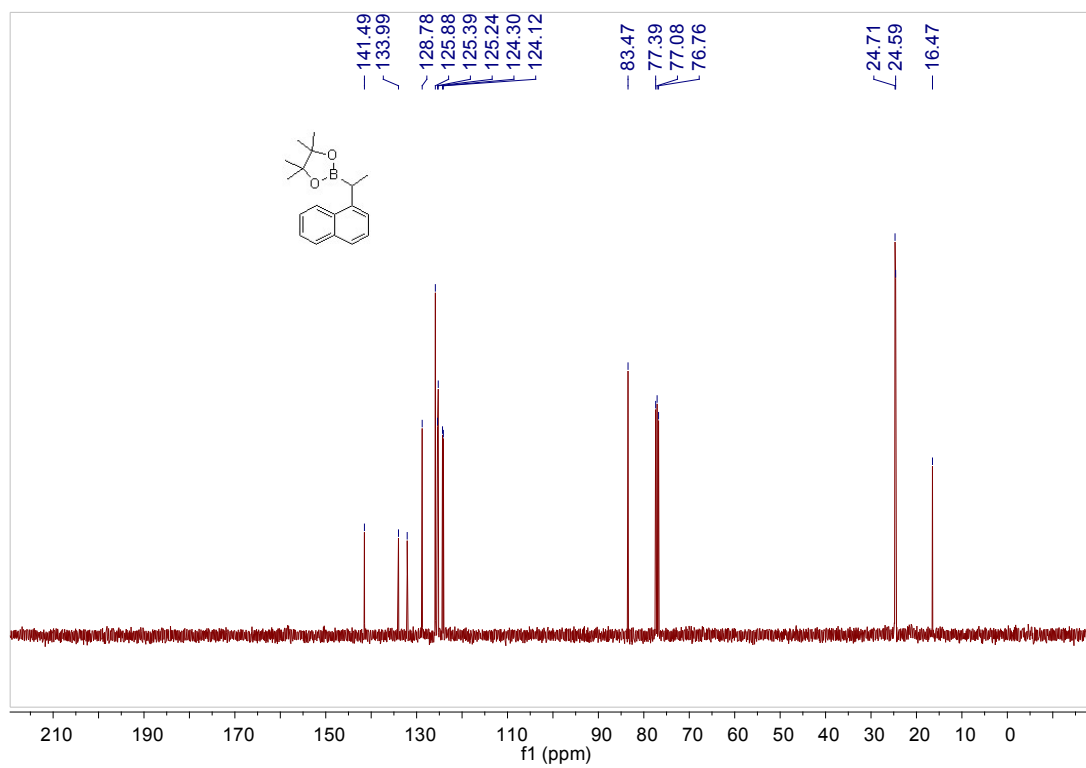

### <sup>11</sup>B NMR of compound 2s

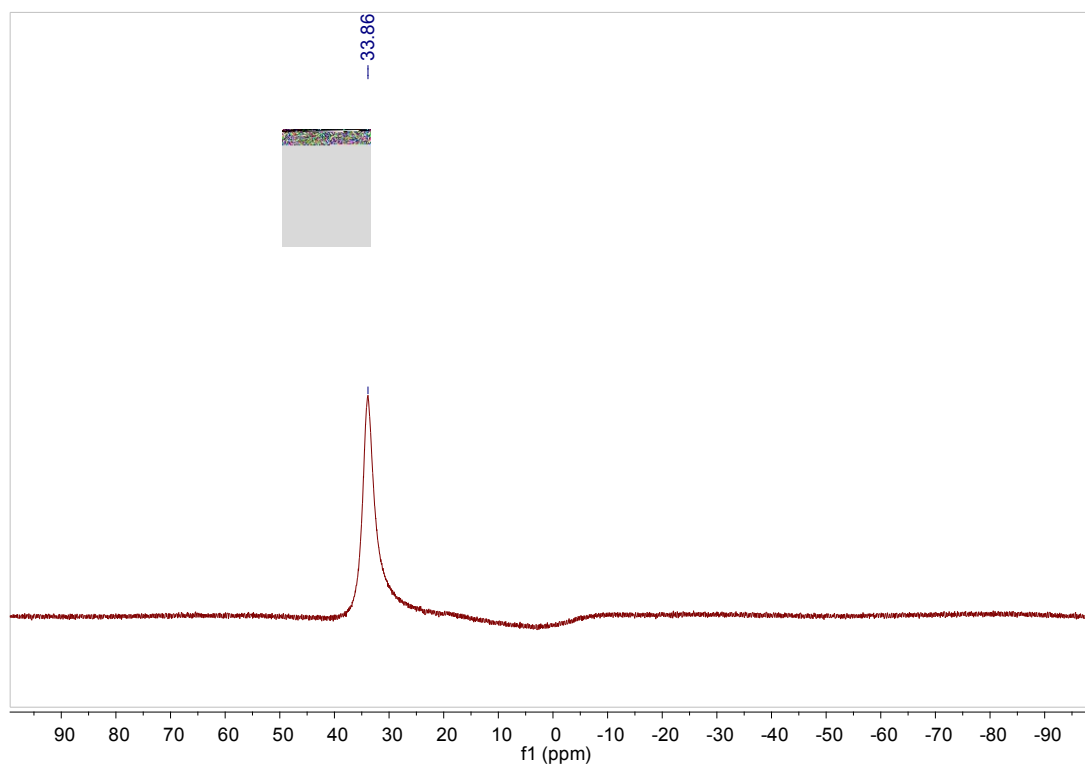

### <sup>1</sup>H NMR of compound 2t

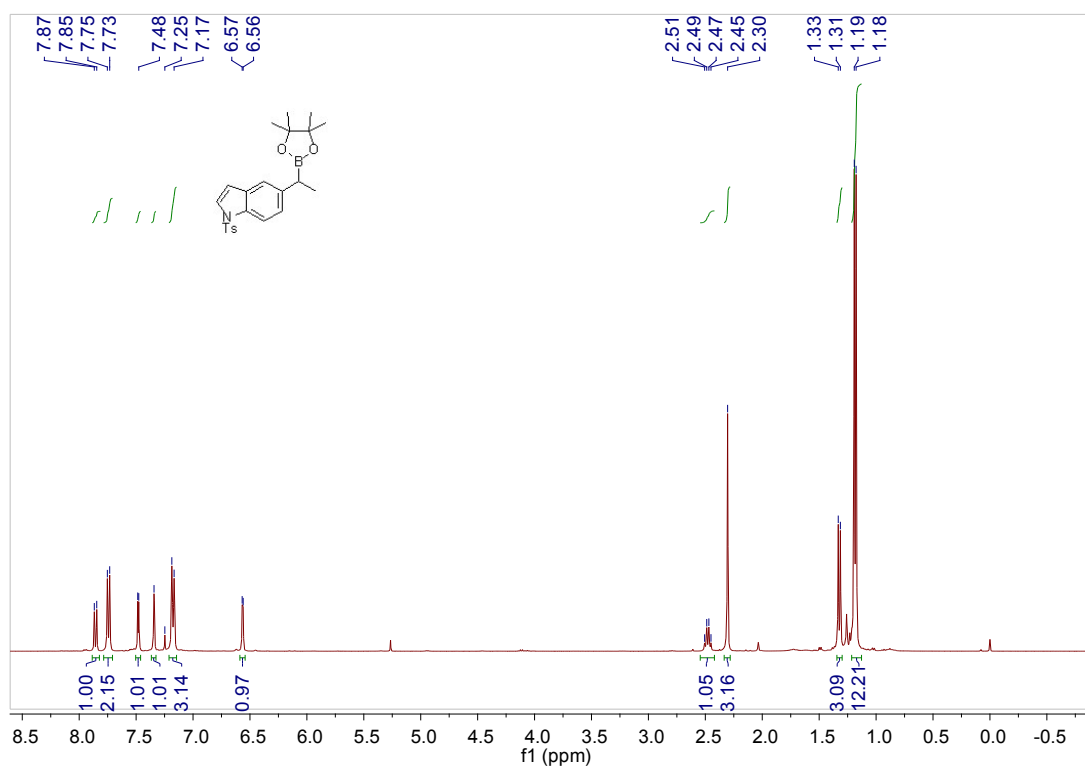

### <sup>13</sup>C NMR of compound 2t

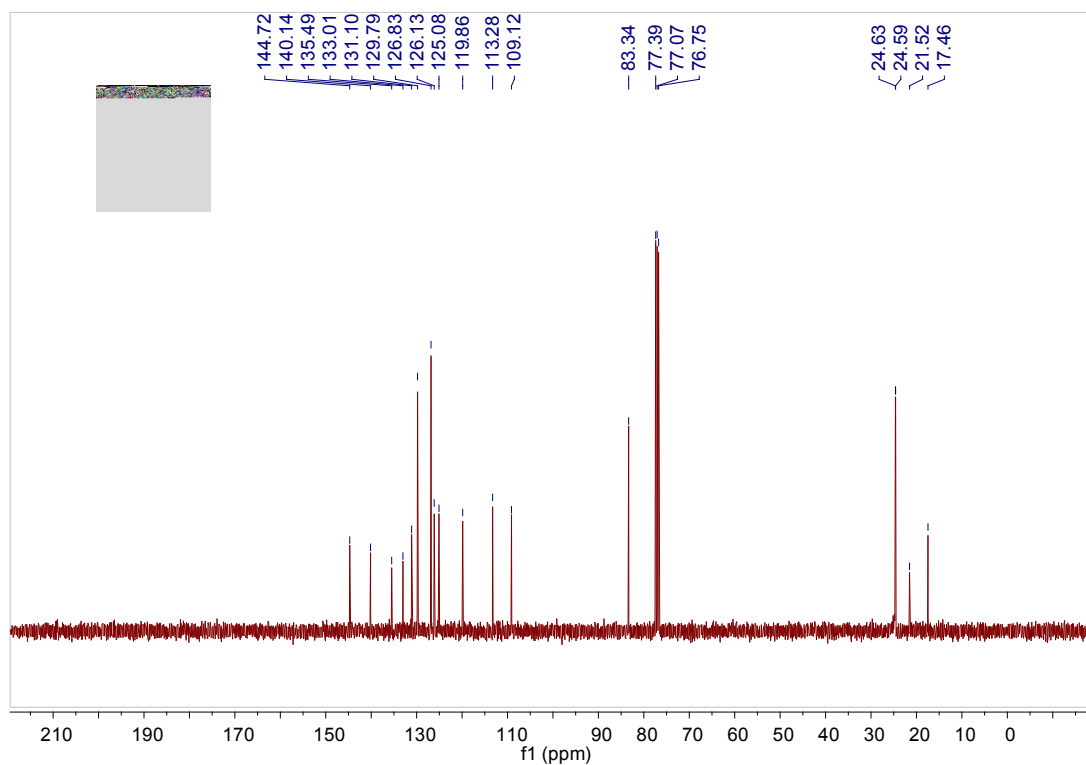

### <sup>11</sup>B NMR of compound 2t

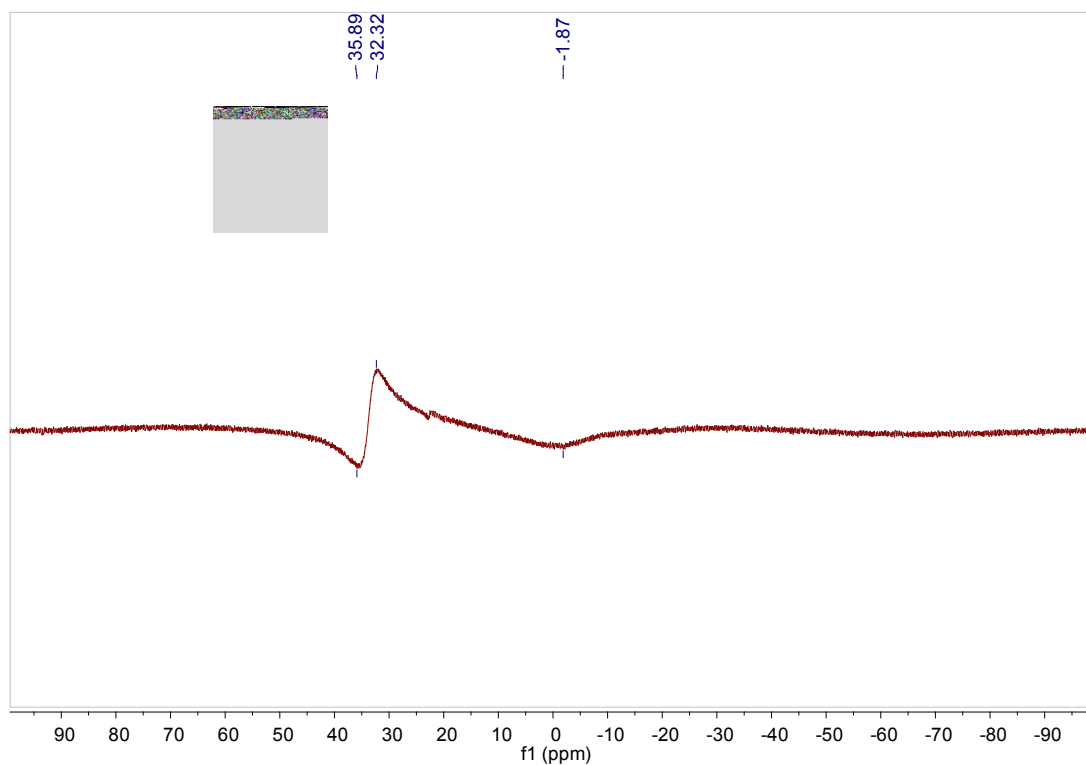

### <sup>1</sup>H NMR of compound 2u

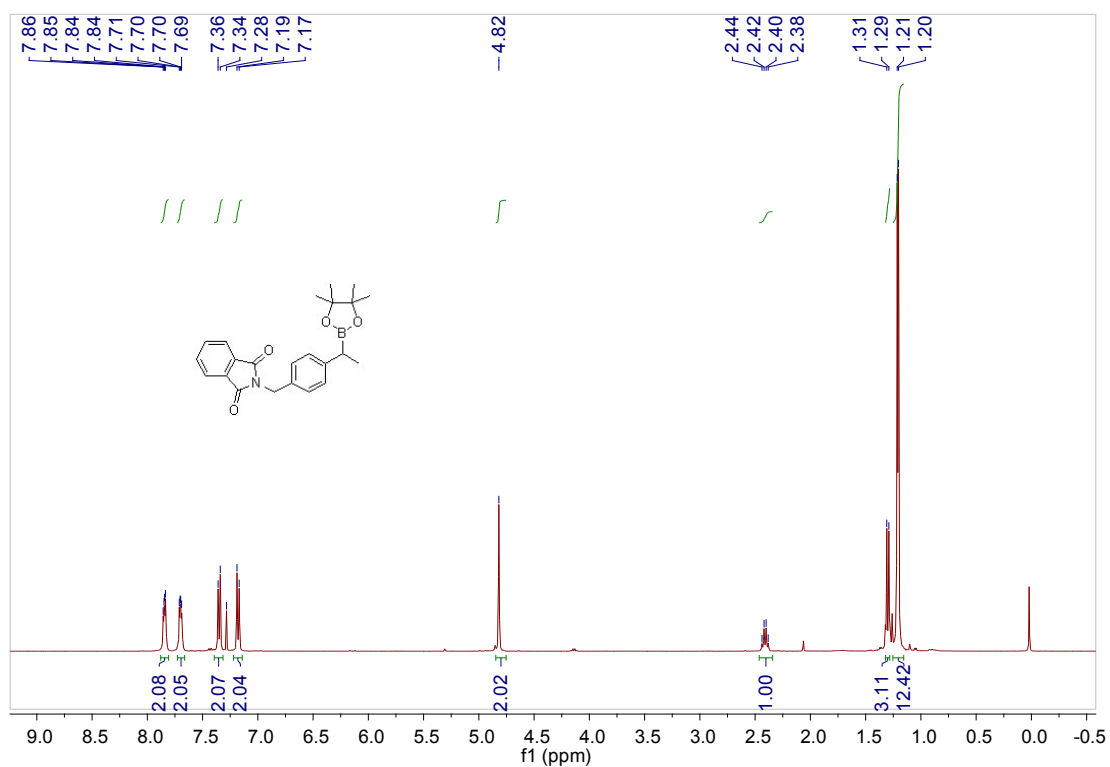

### <sup>13</sup>C NMR of compound 2u

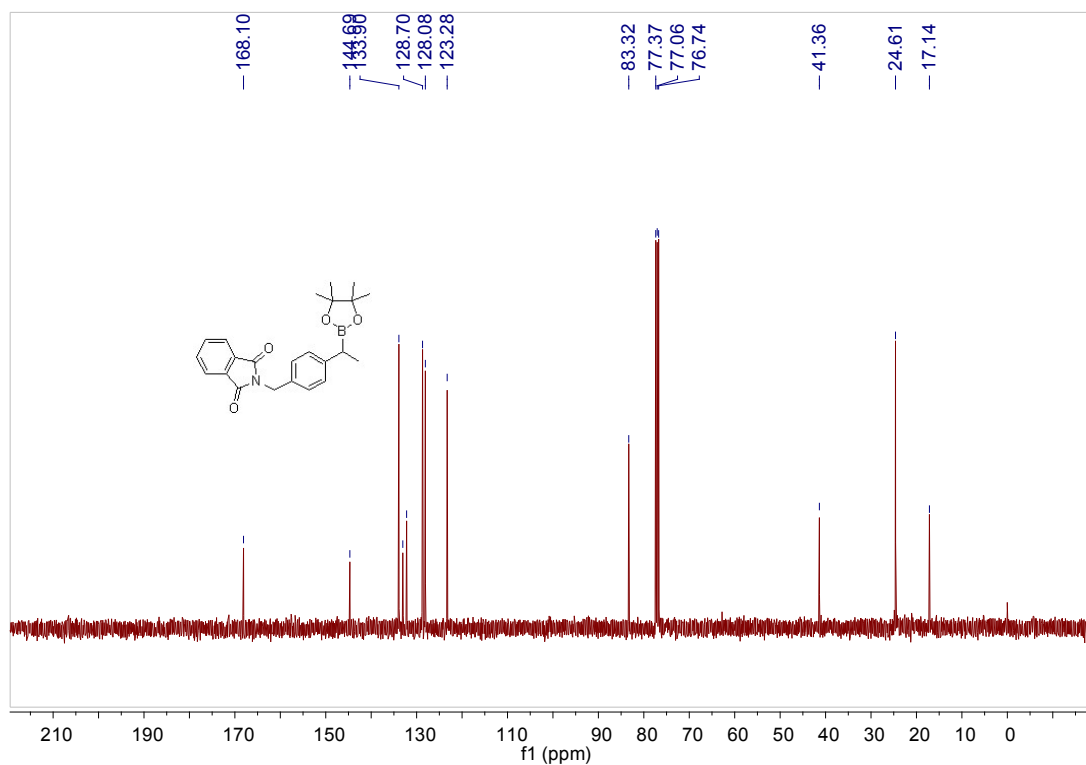

### $^{11}\text{B}$ NMR of compound 2u

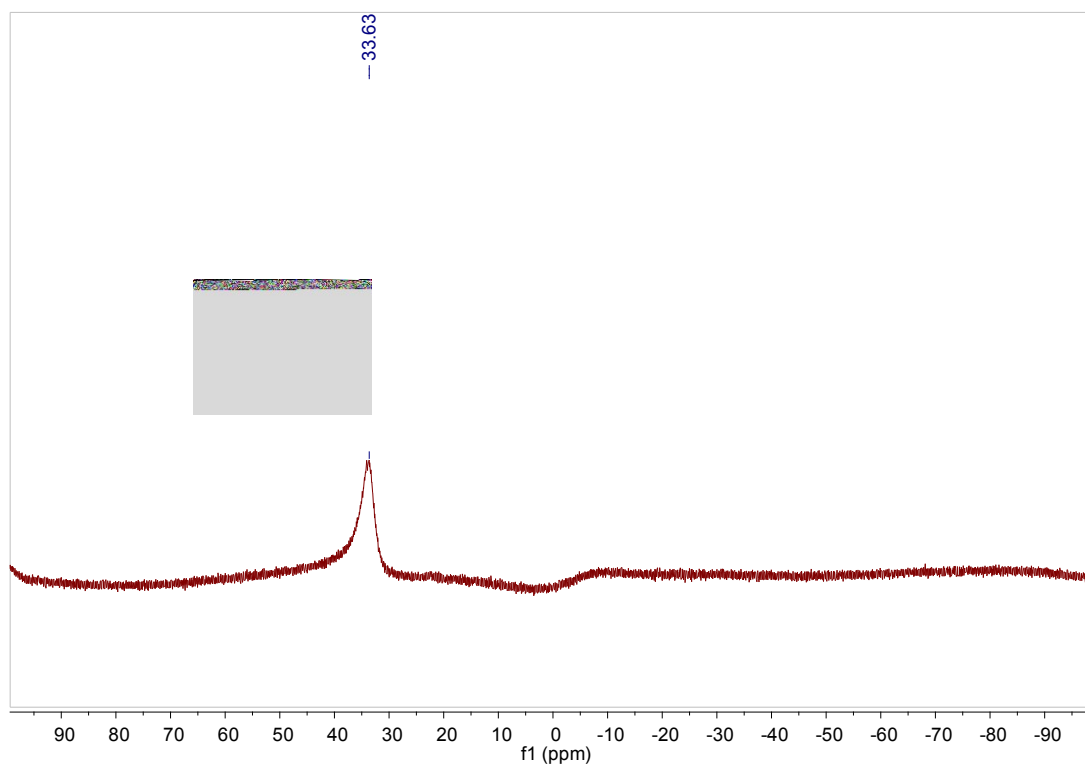

### $^1\text{H}$ NMR of compound 2v

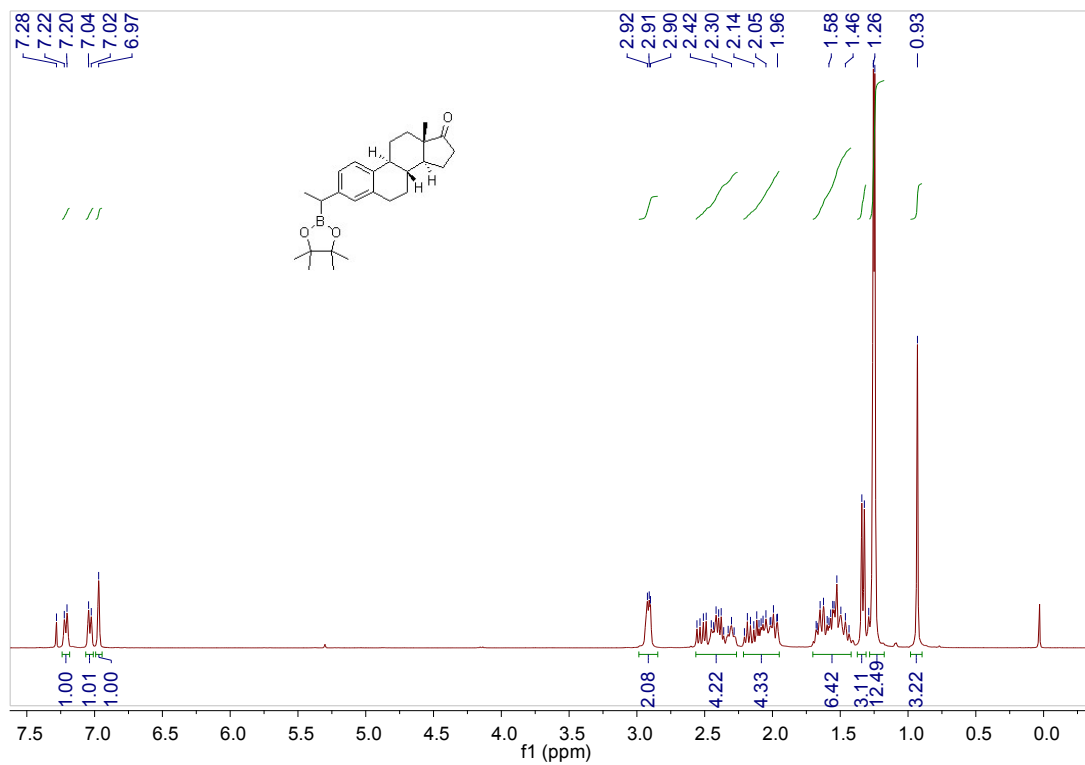

### <sup>13</sup>C NMR of compound 2v

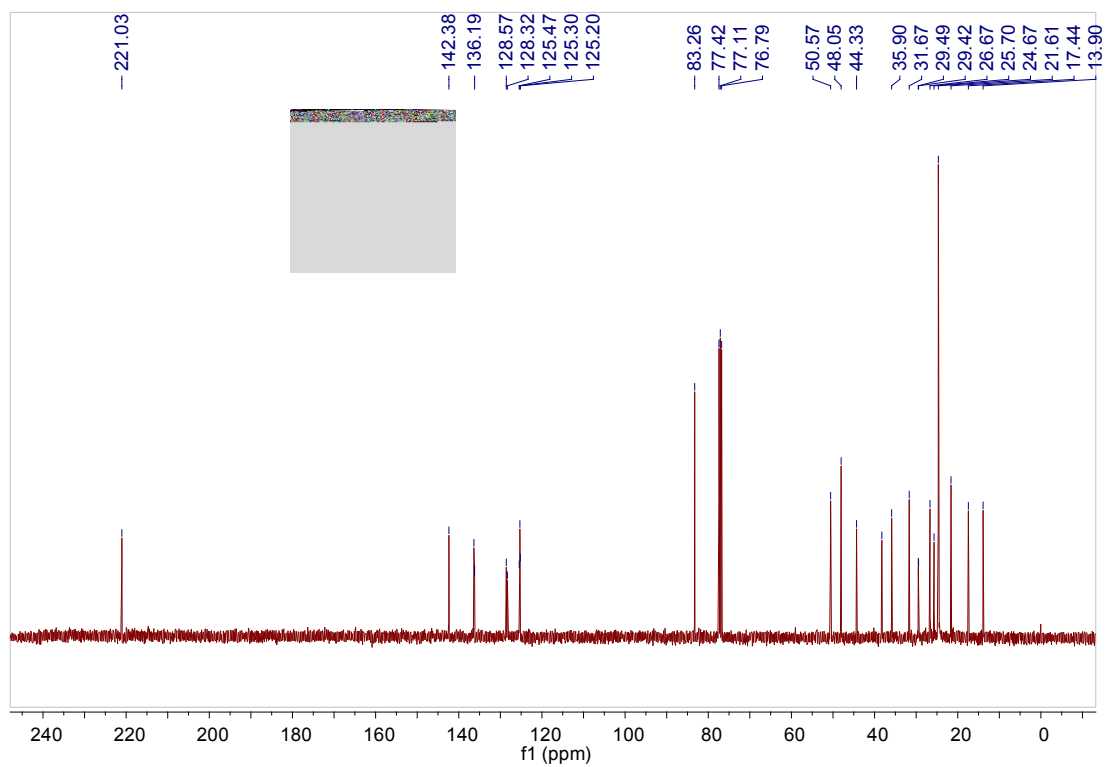

### <sup>11</sup>B NMR of compound 2v

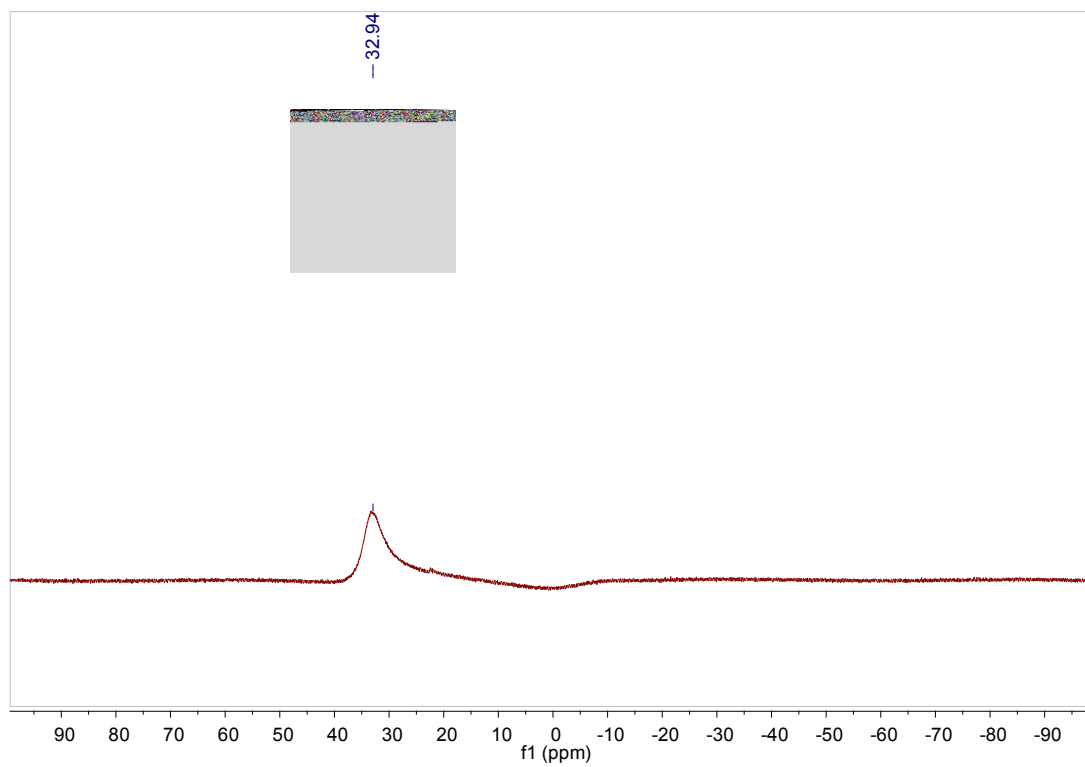

### <sup>1</sup>H NMR of compound 2w

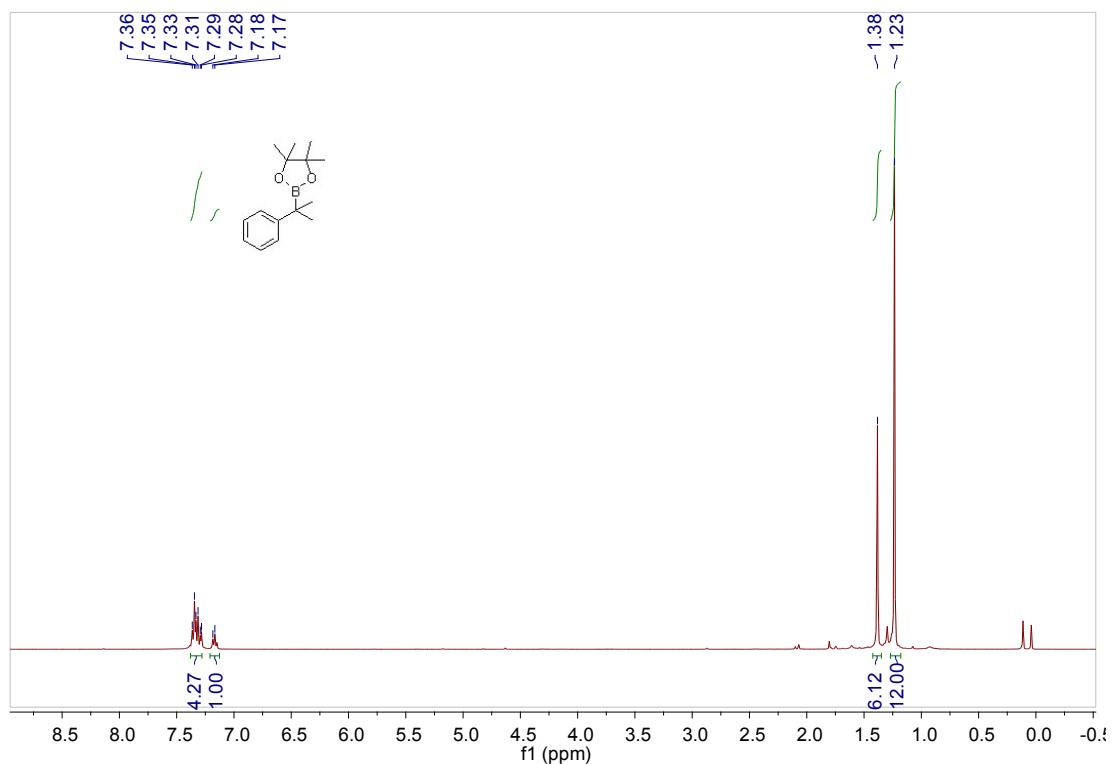

### <sup>13</sup>C NMR of compound 2w

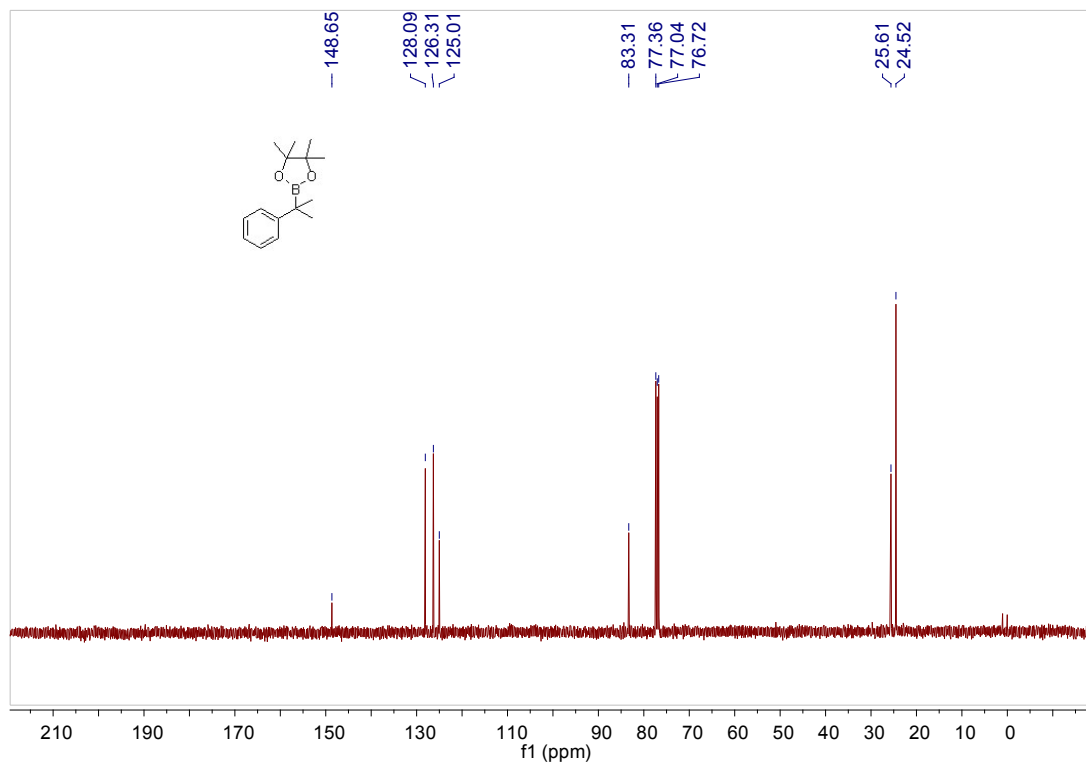



### $^{11}\text{B}$ NMR of compound 2w

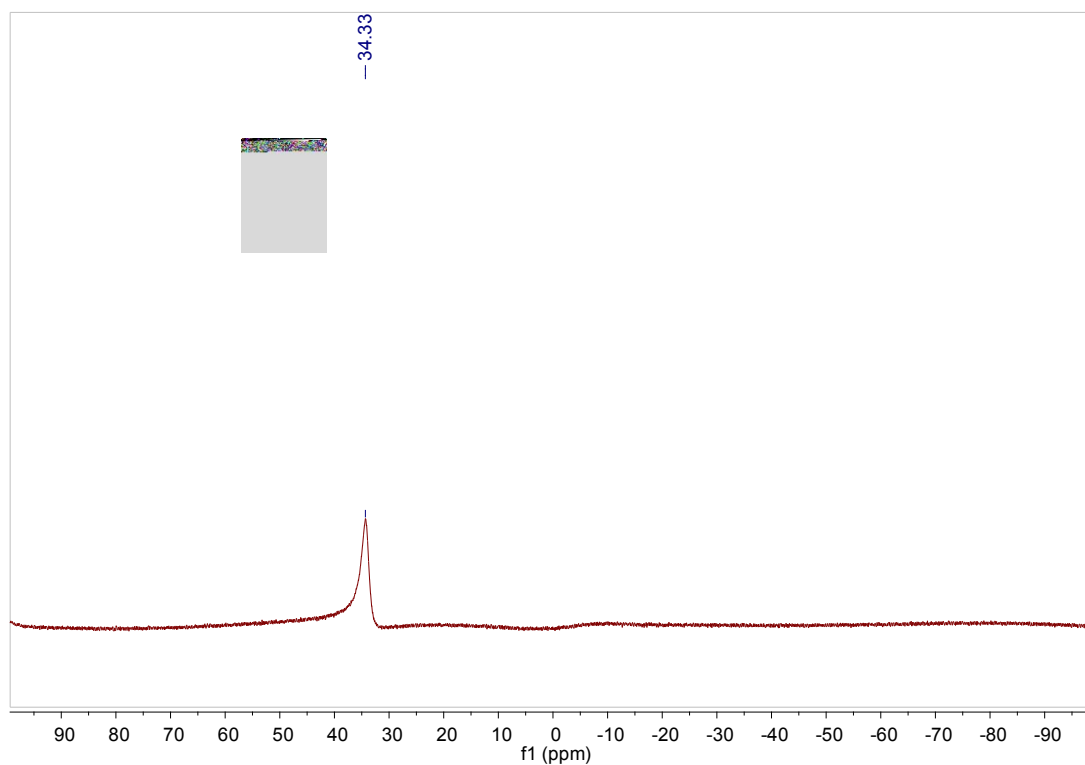

### $^1\text{H}$ NMR of compound 2aa

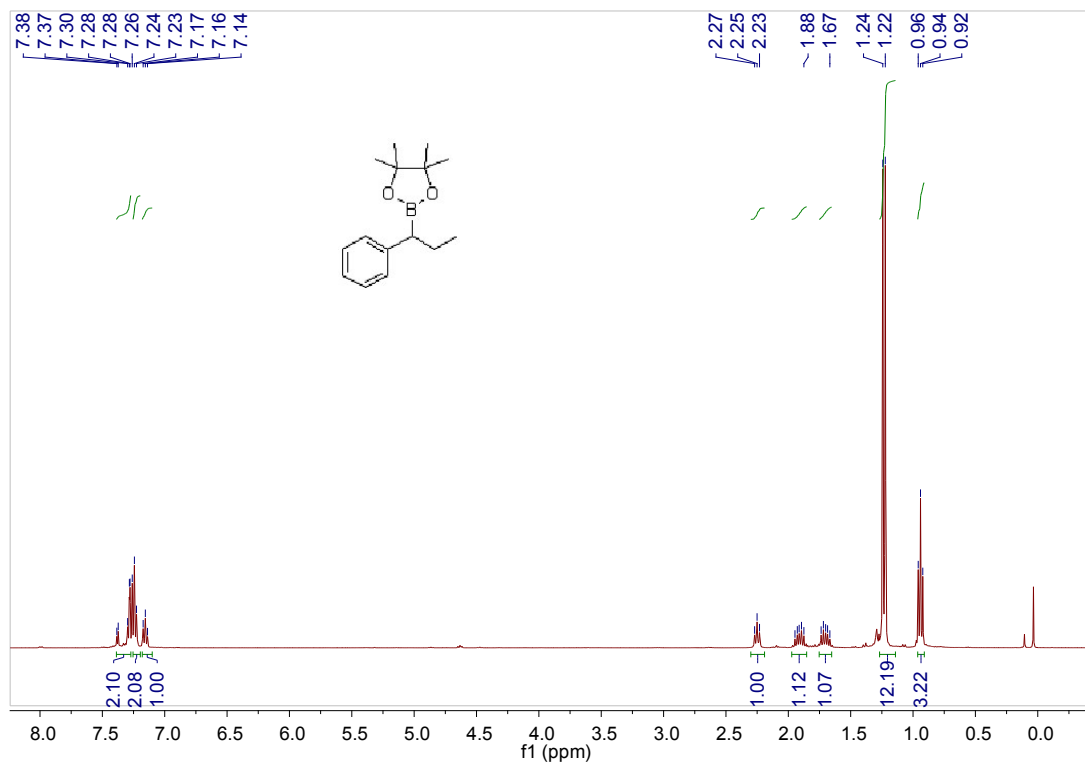

### <sup>13</sup>C NMR of compound 2aa

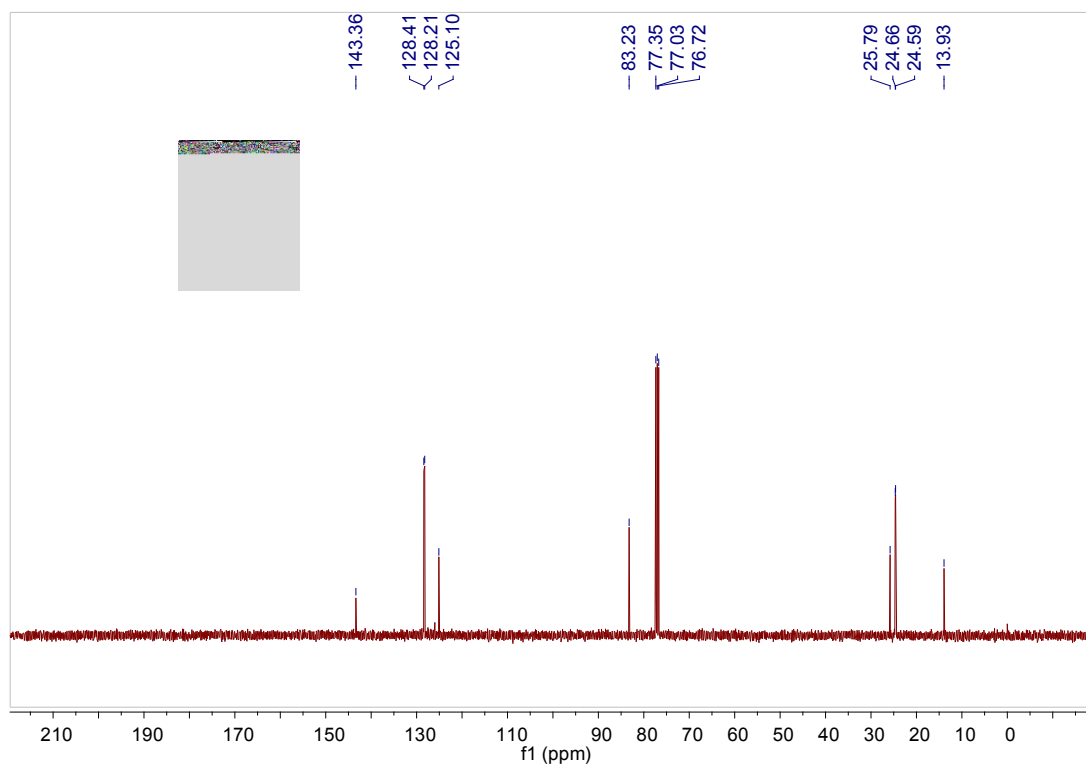

### <sup>11</sup>B NMR of compound 2aa

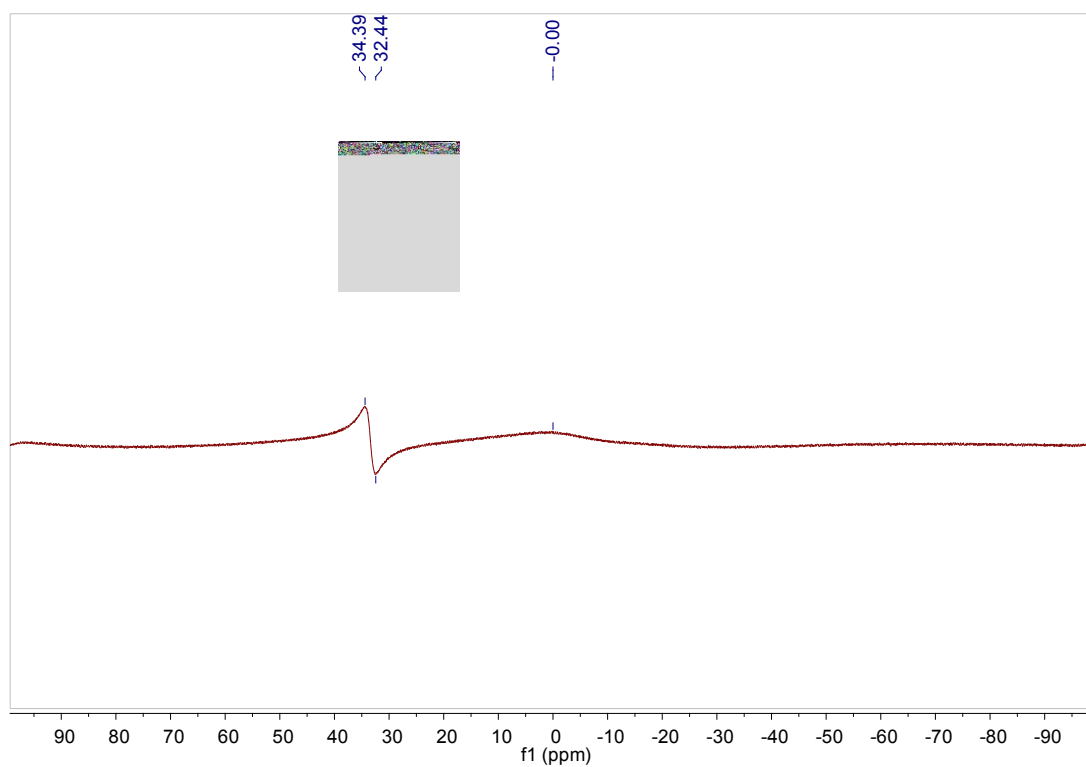

### <sup>1</sup>H NMR of compound 2ab

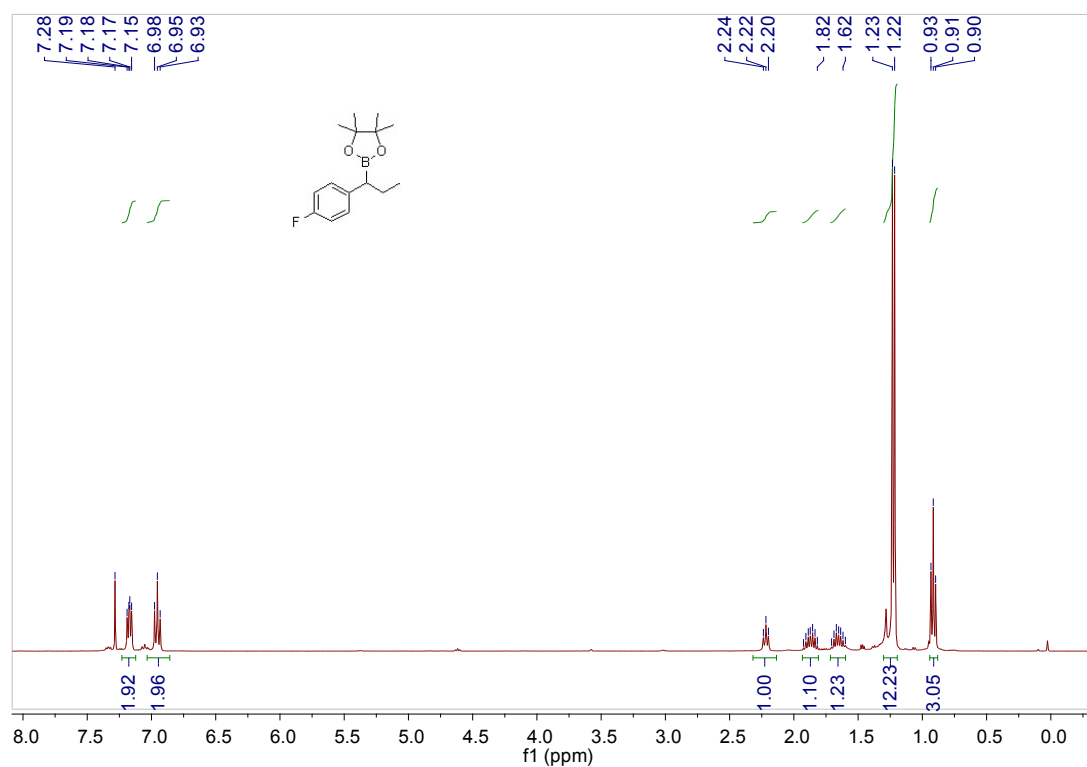

### <sup>13</sup>C NMR of compound 2ab

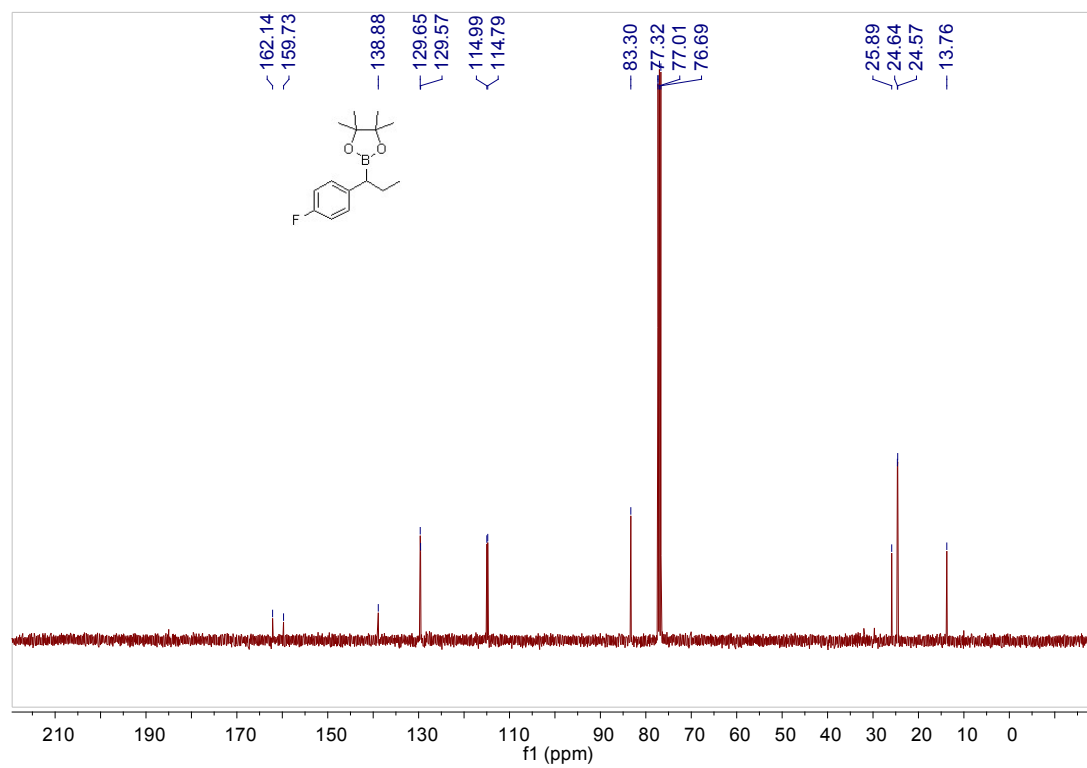

### <sup>11</sup>B NMR of compound 2ab

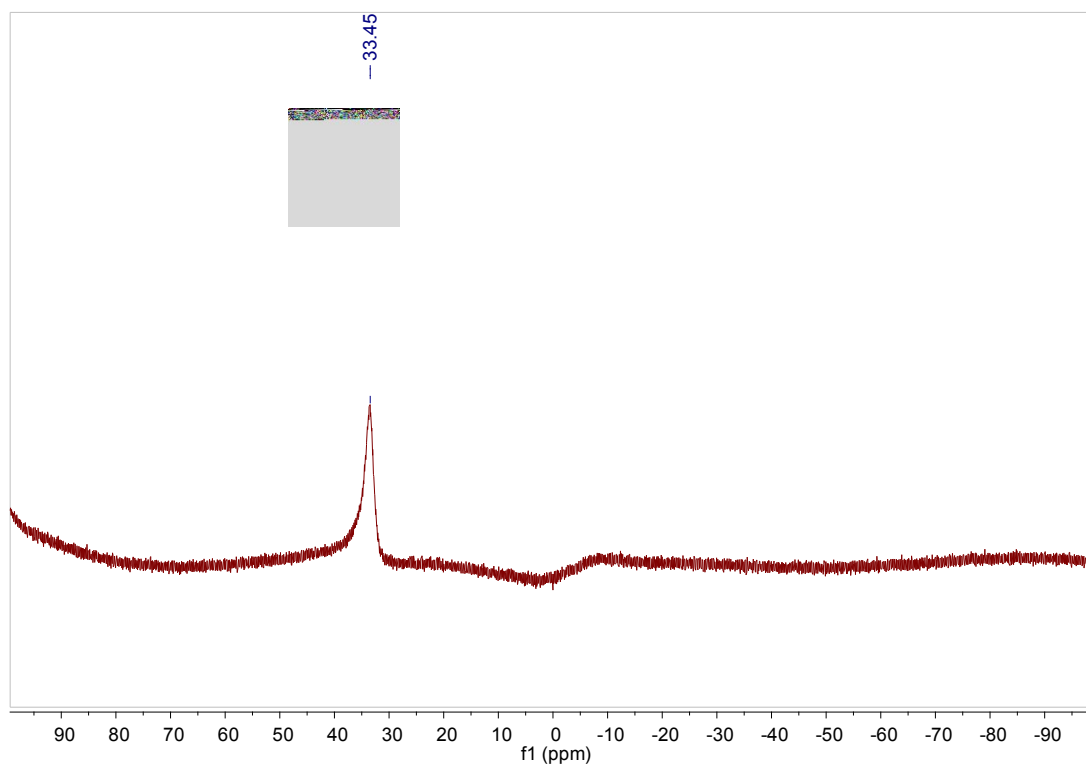

### <sup>1</sup>H NMR of compound 2ac

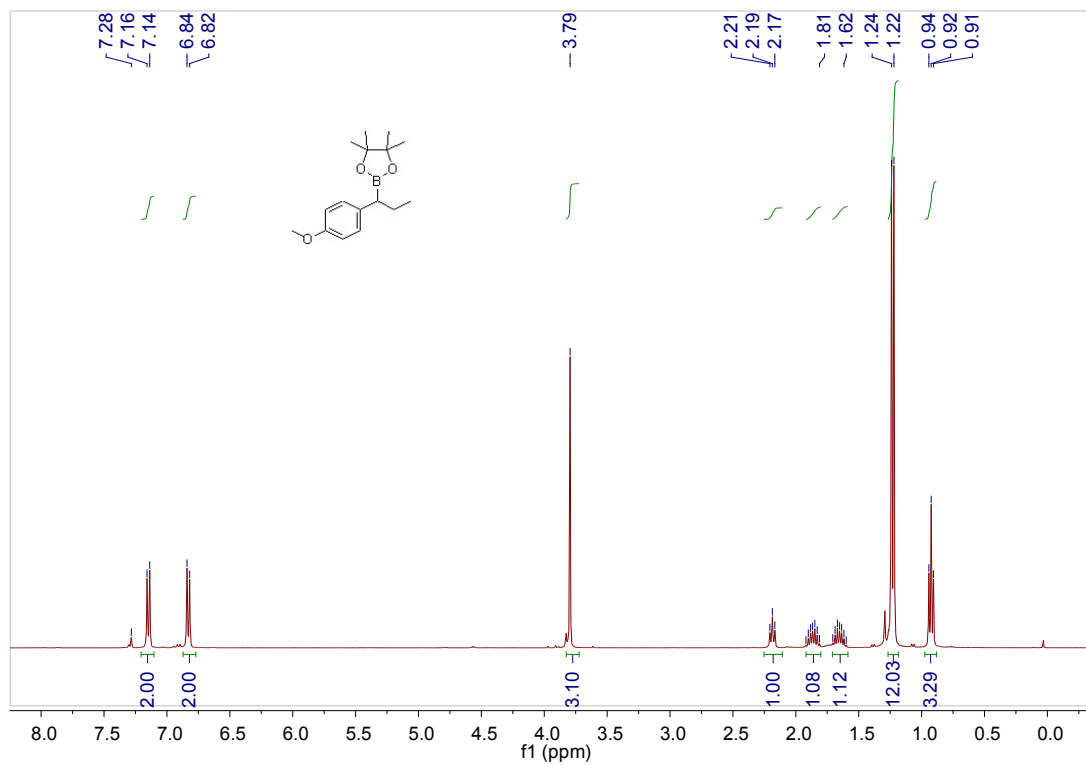

### <sup>13</sup>C NMR of compound 2ac

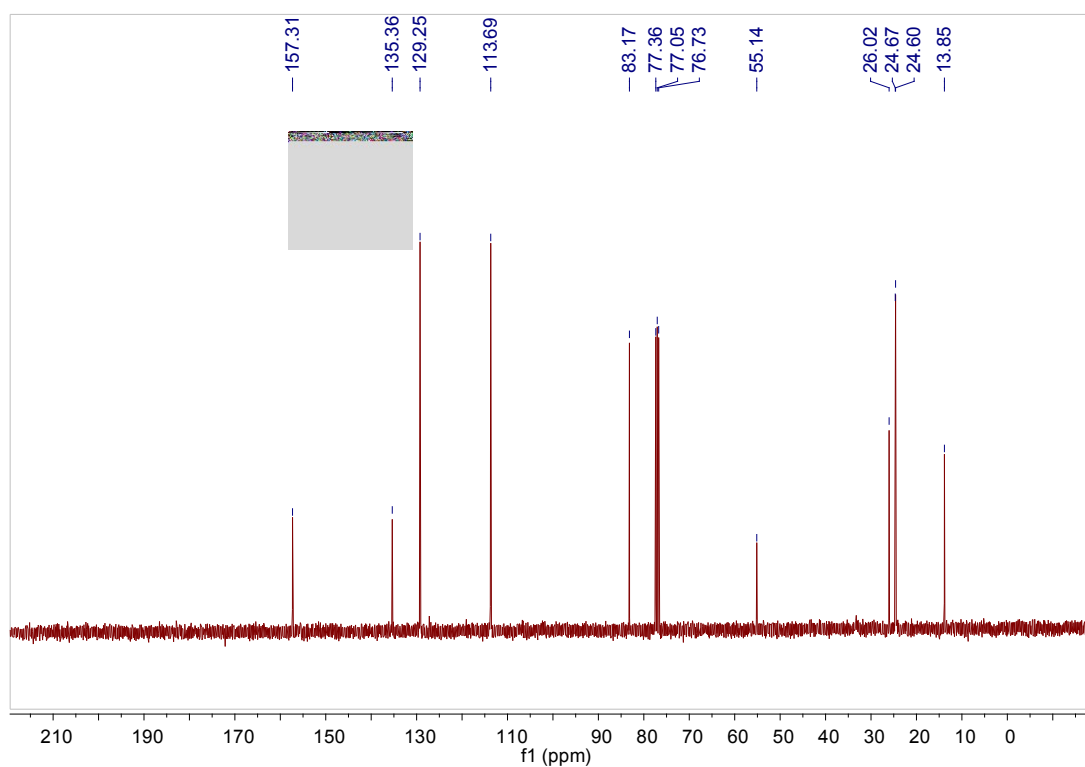

### <sup>11</sup>B NMR of compound 2ac

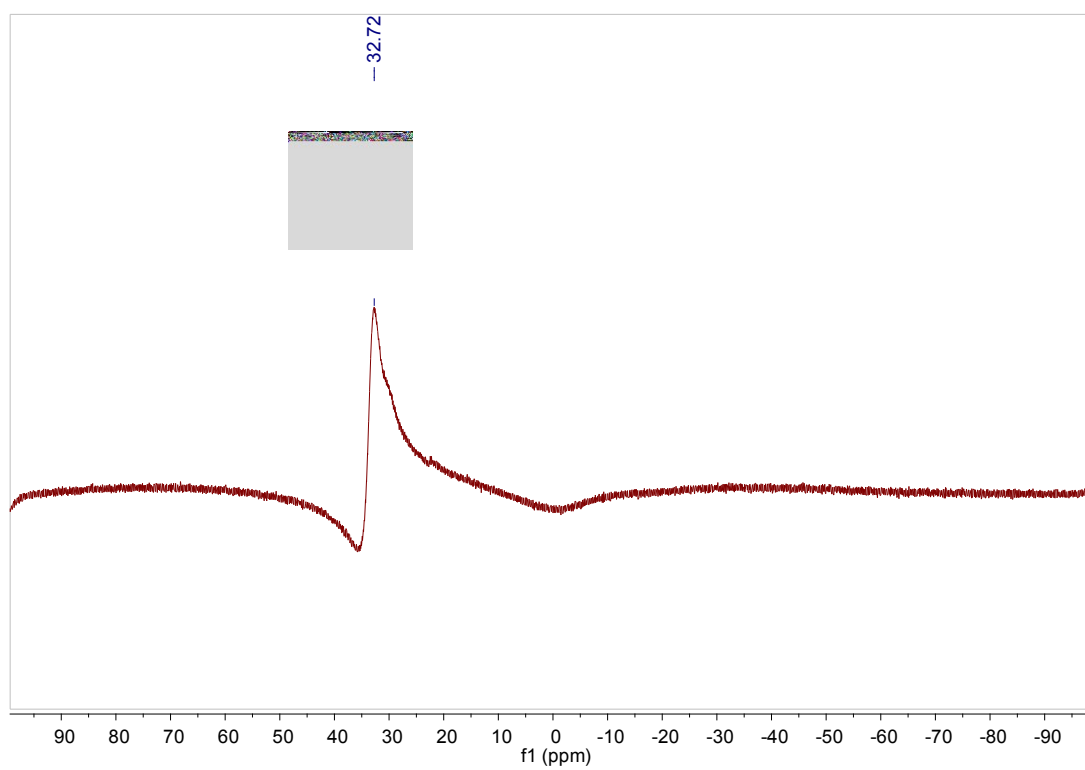

### <sup>1</sup>H NMR of compound 2ad

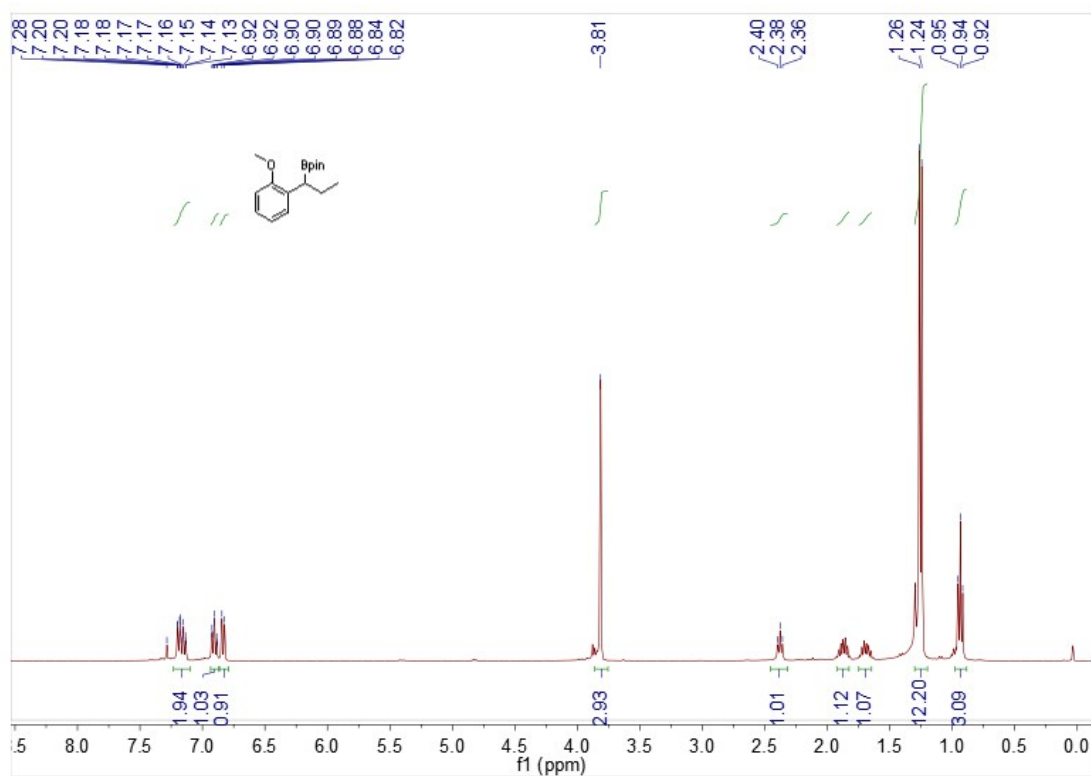

### <sup>13</sup>C NMR of compound 2ad

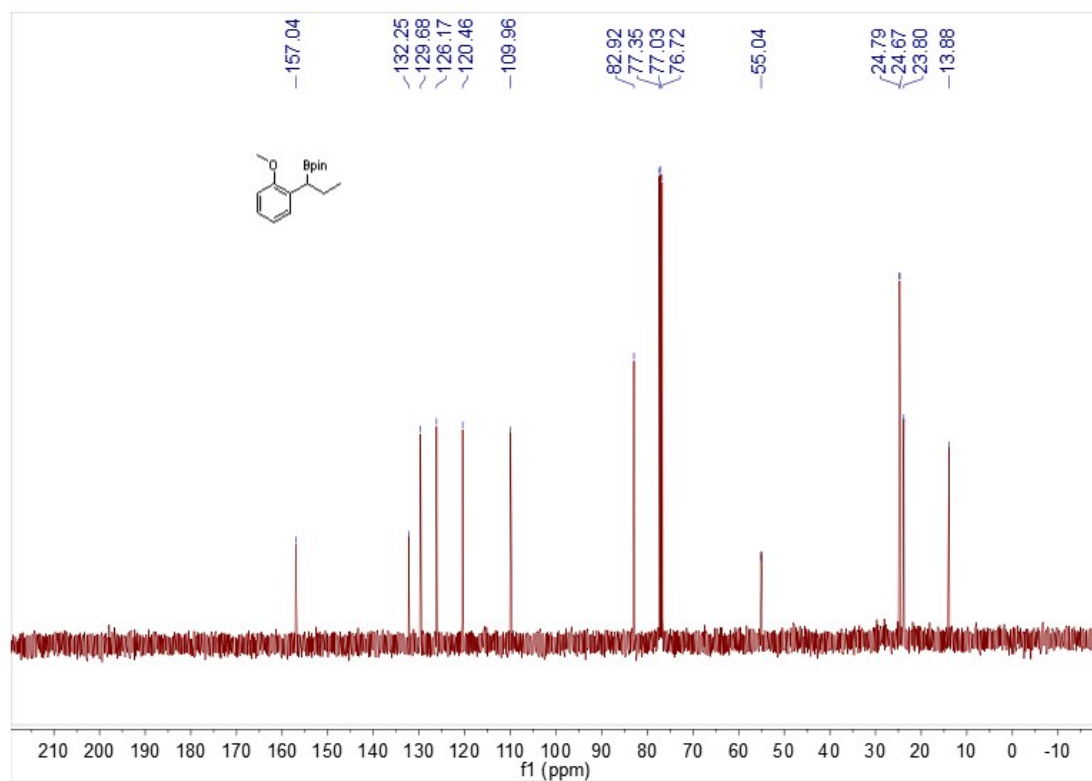

### <sup>11</sup>B NMR of compound 2ad

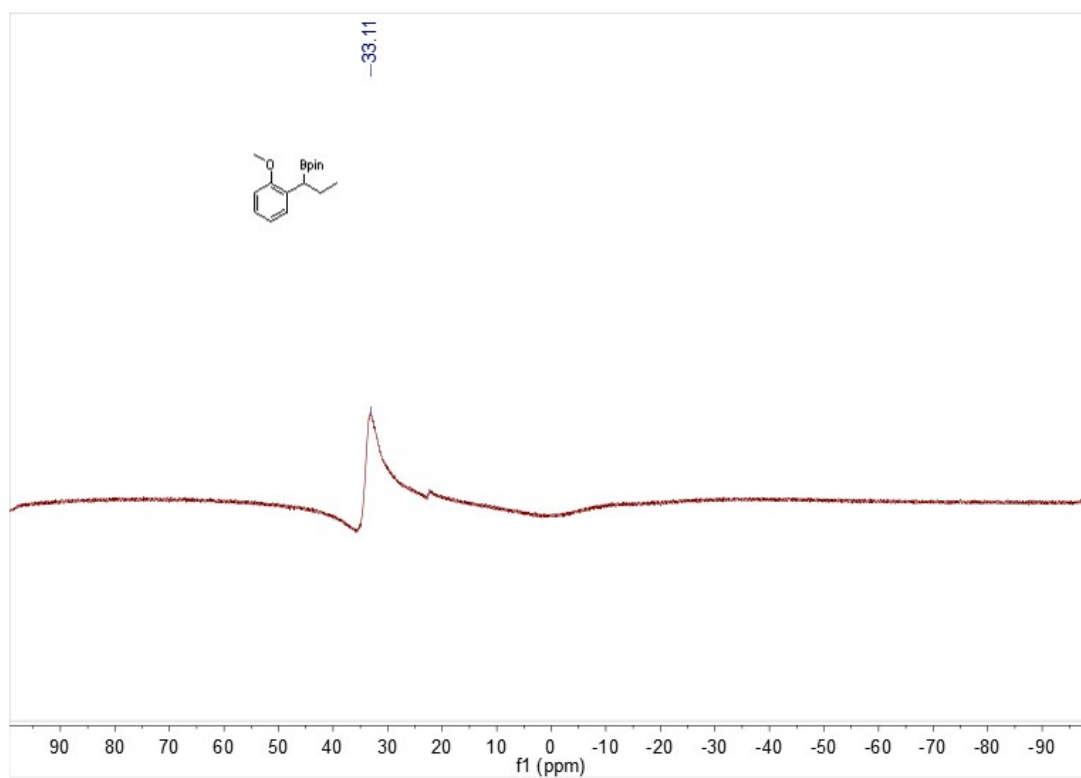

### <sup>1</sup>H NMR of compound 2ae

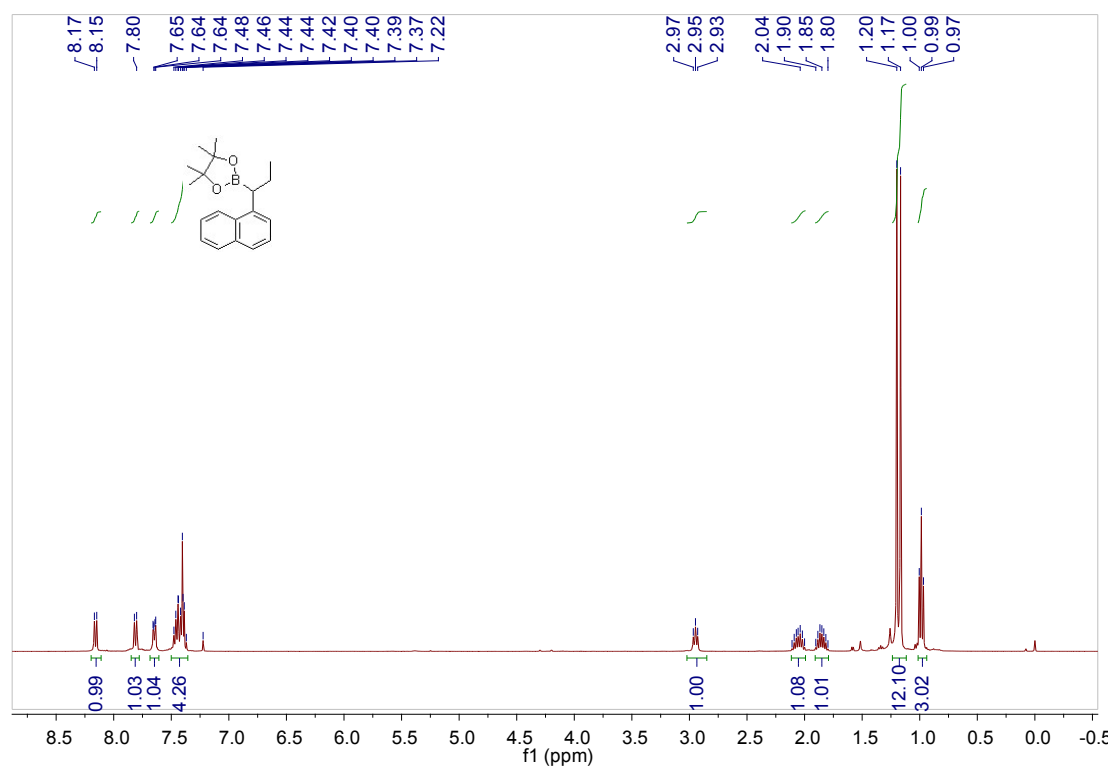

### <sup>13</sup>C NMR of compound 2ae

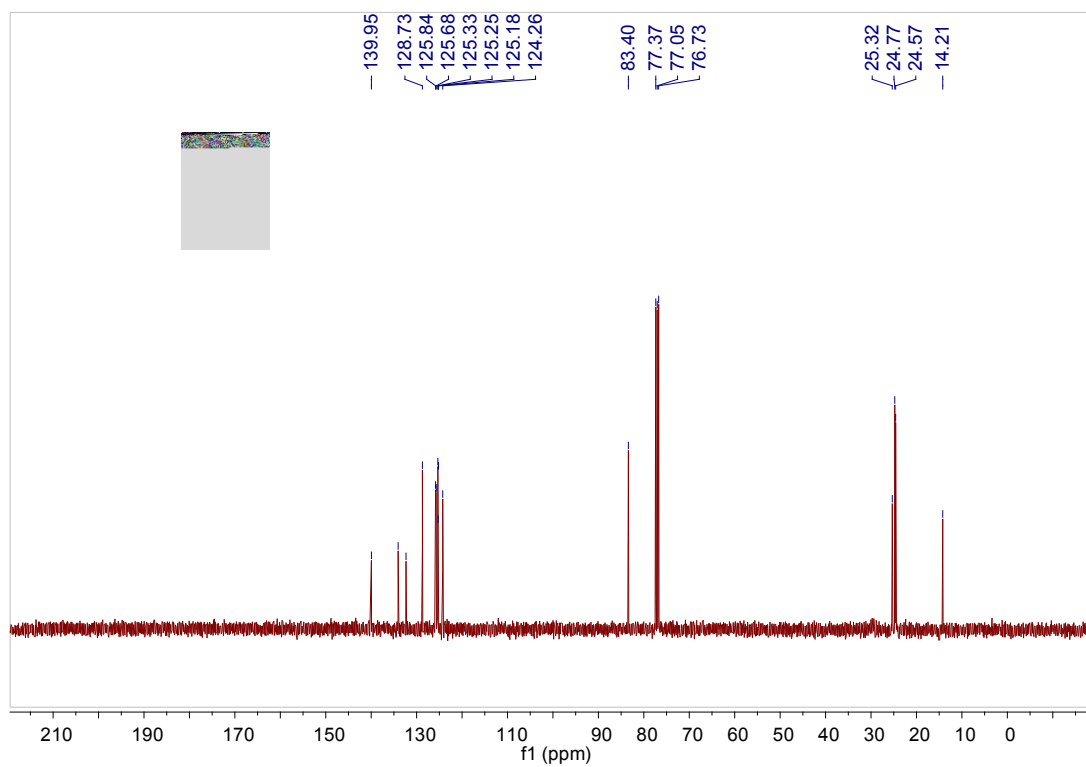

### <sup>11</sup>B NMR of compound 2ae

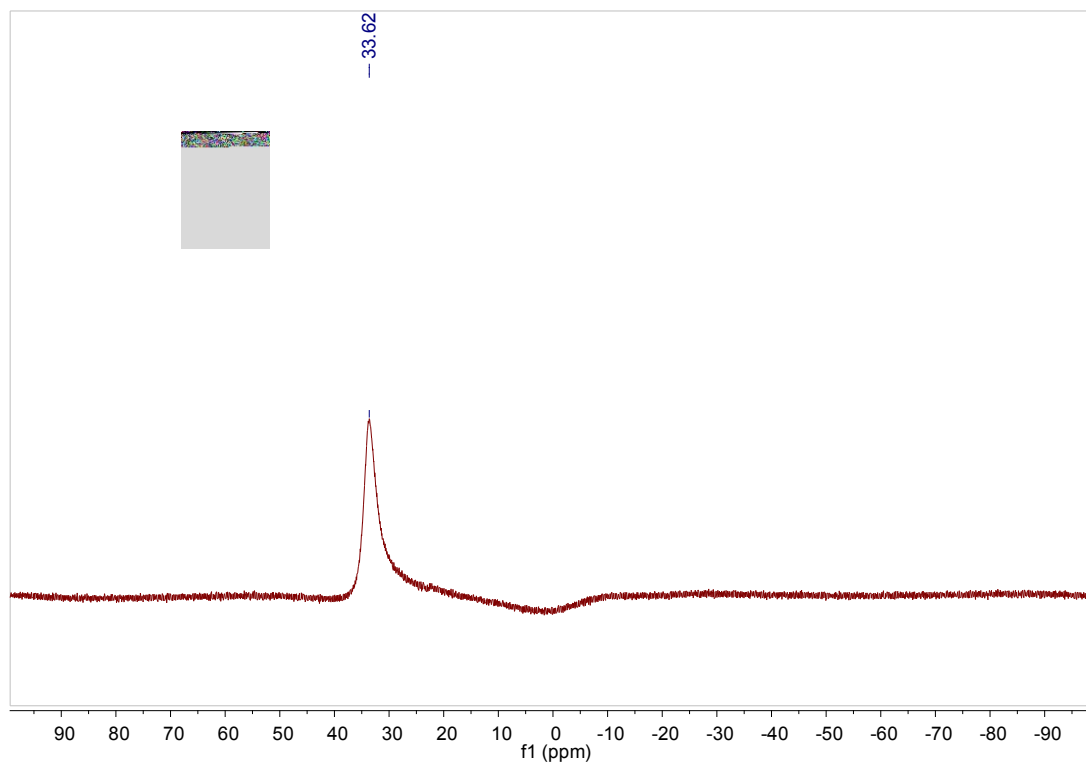



### <sup>1</sup>H NMR of compound 2af

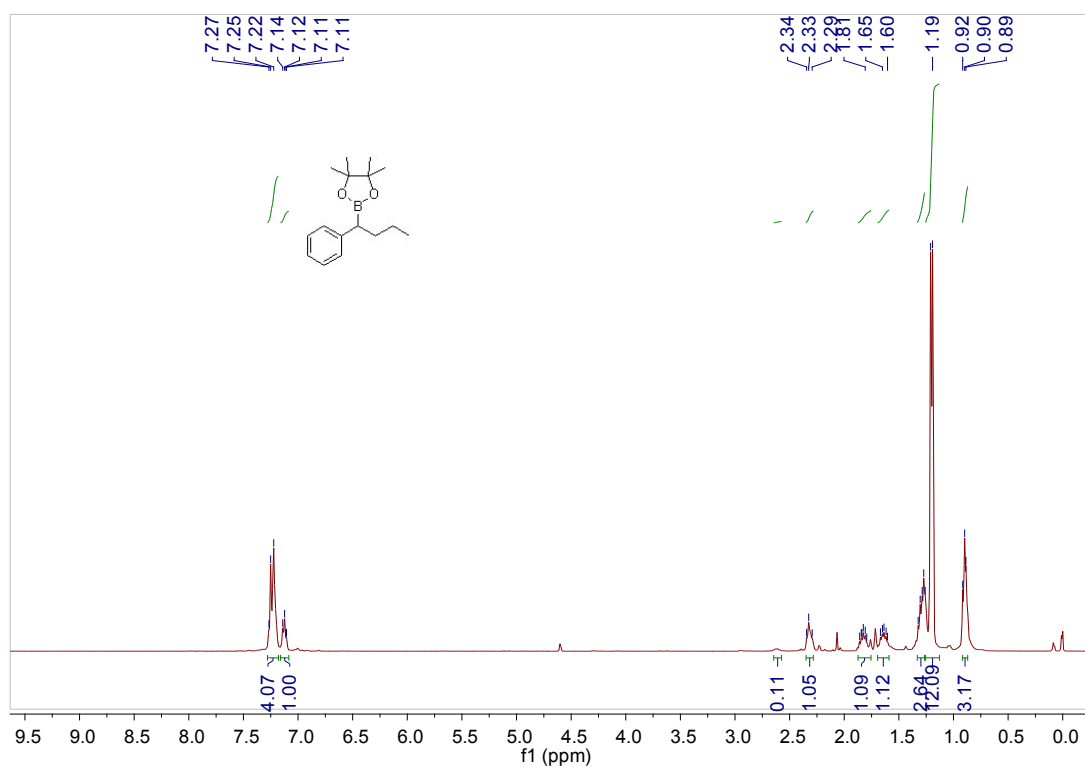

### <sup>13</sup>C NMR of compound 2af

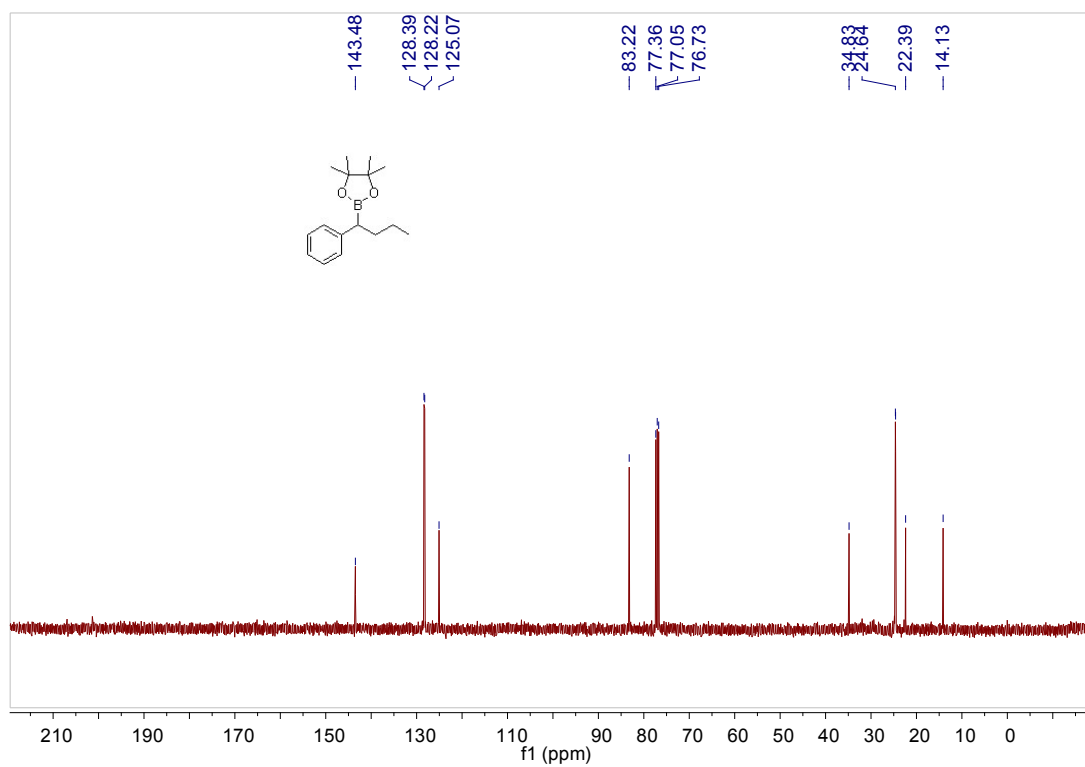

### $^{11}\text{B}$ NMR of compound 2af

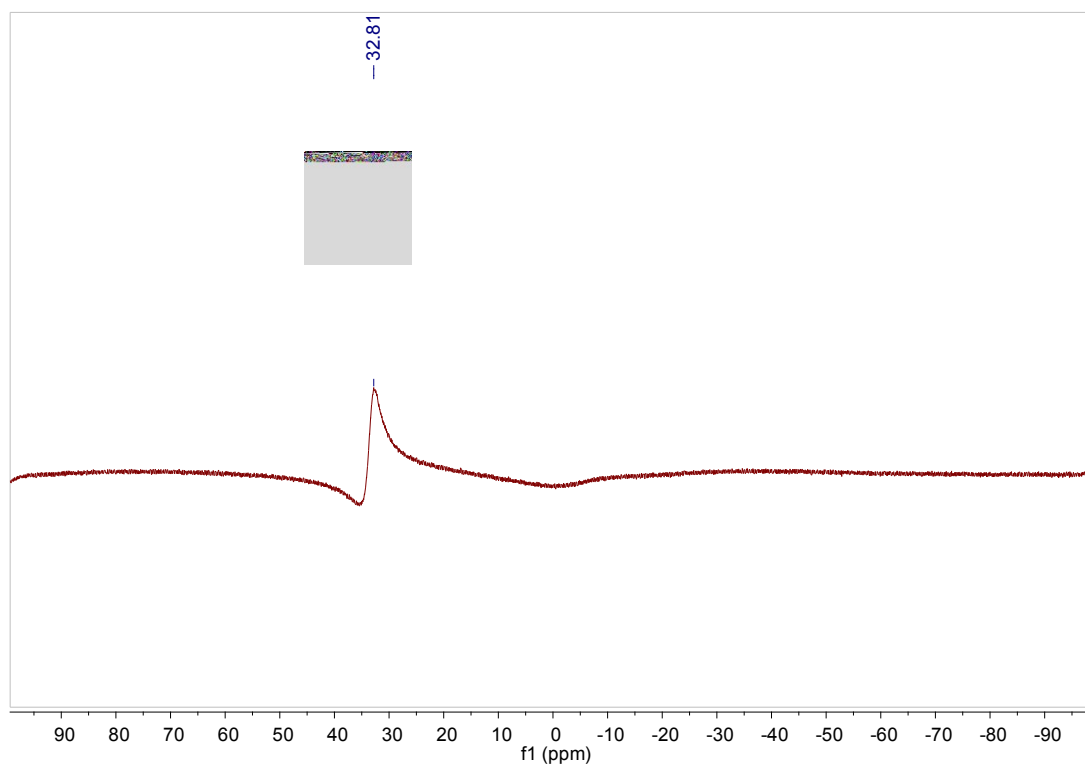

### $^1\text{H}$ NMR of compound 2ai

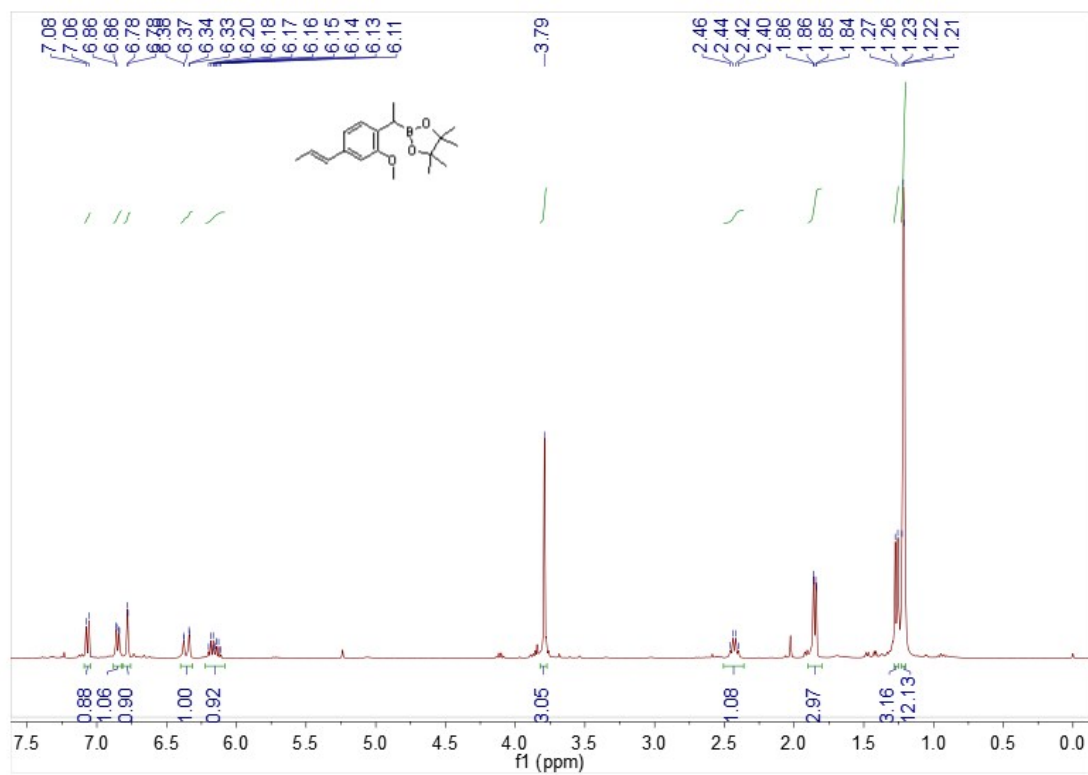

### <sup>13</sup>C NMR of compound 2ai

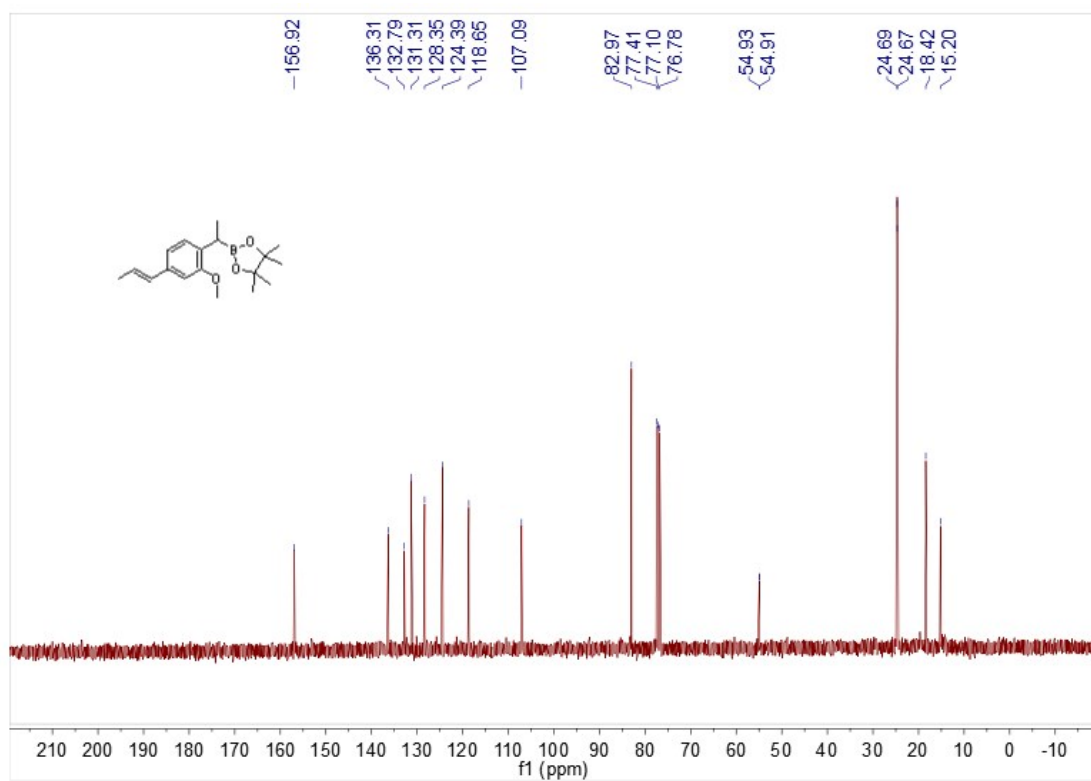

### <sup>11</sup>B NMR of compound 2ai

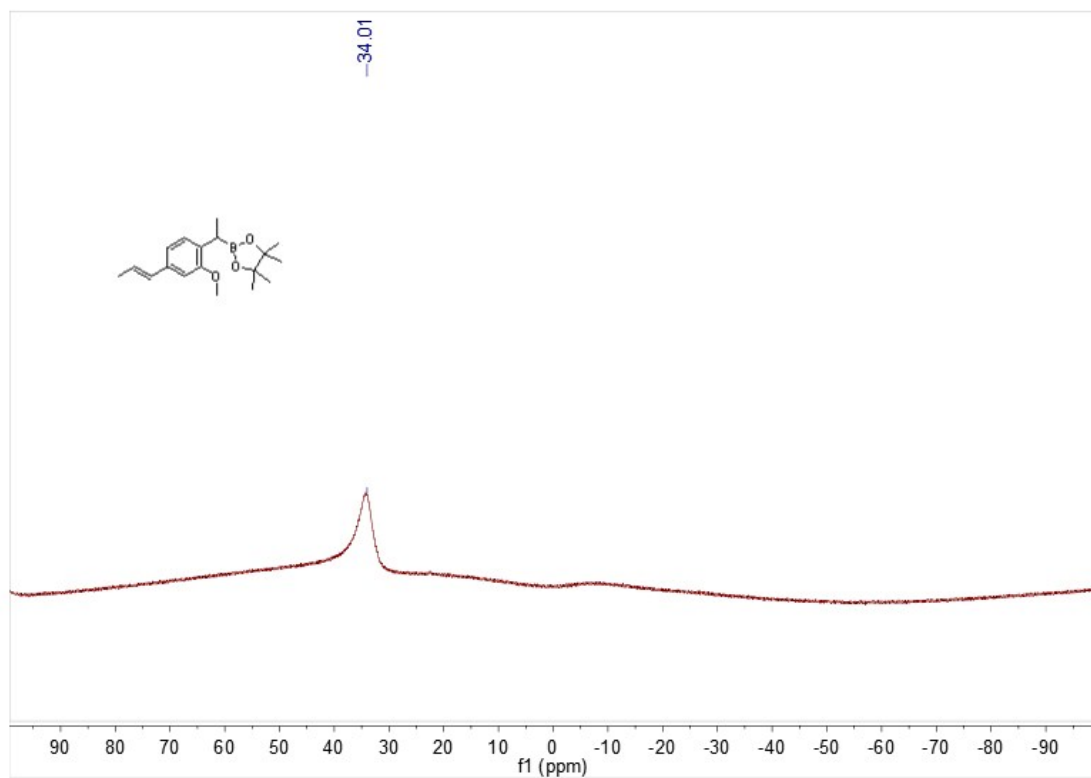

### <sup>1</sup>H NMR of compound *dI-2a*

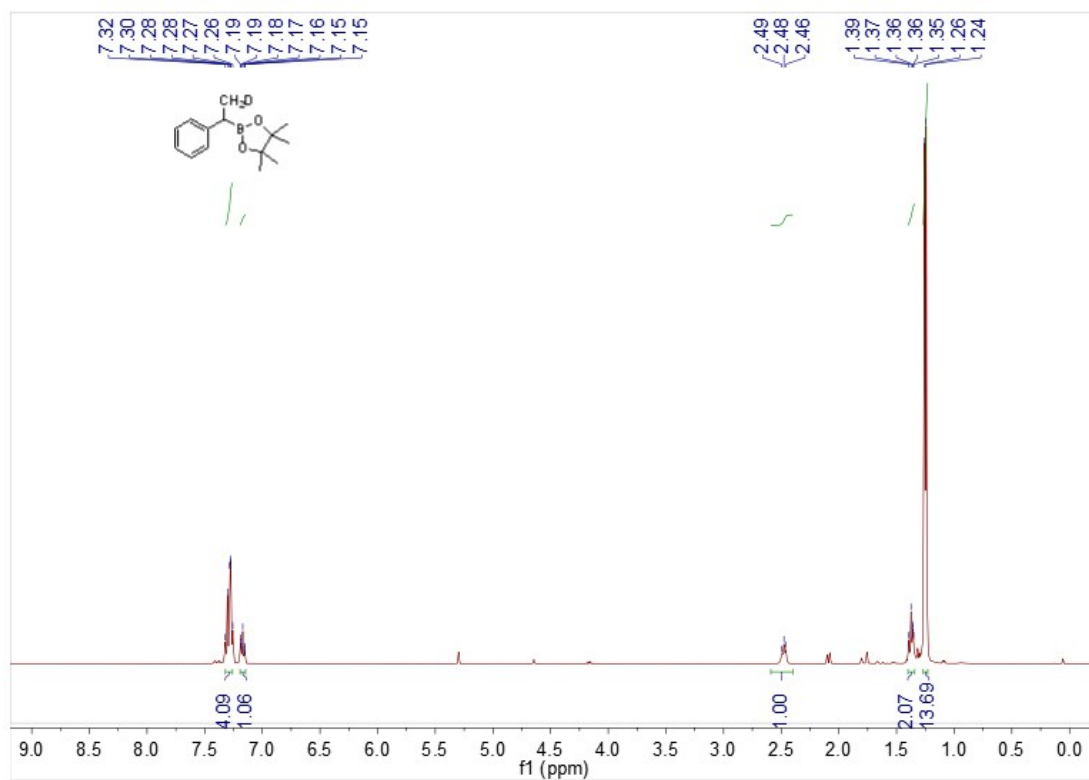

### <sup>1</sup>H NMR of compound 4

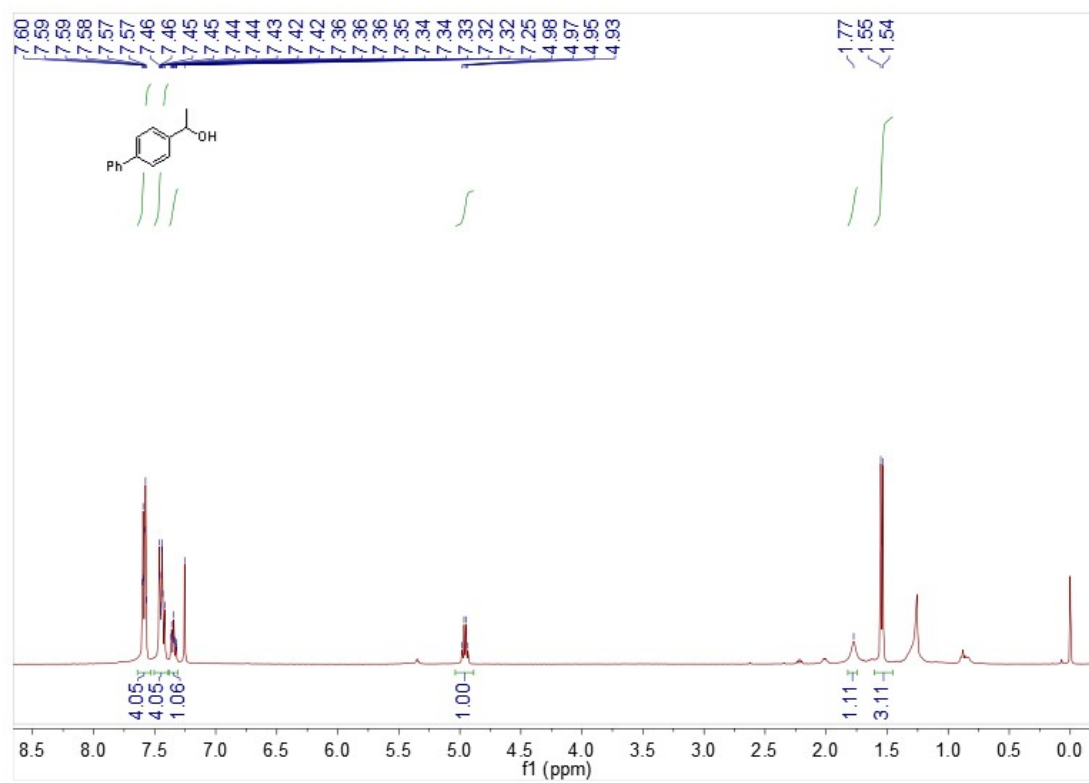

### <sup>13</sup>C NMR of compound 4

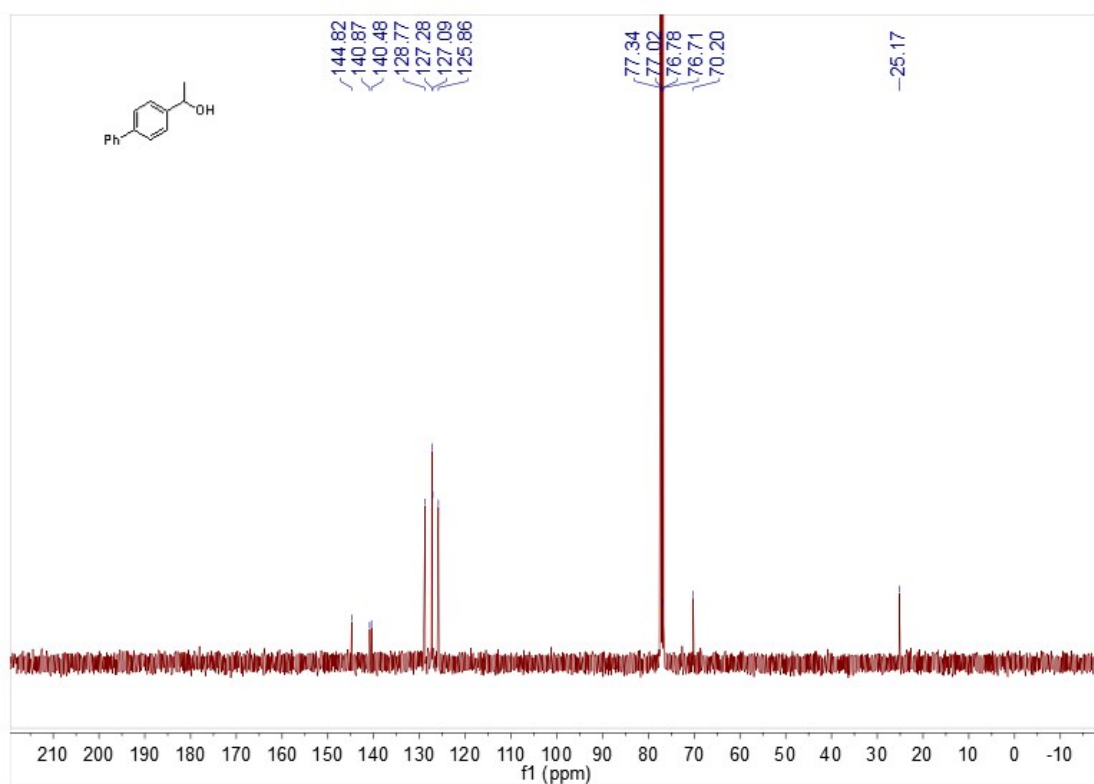

### <sup>1</sup>H NMR of compound 5

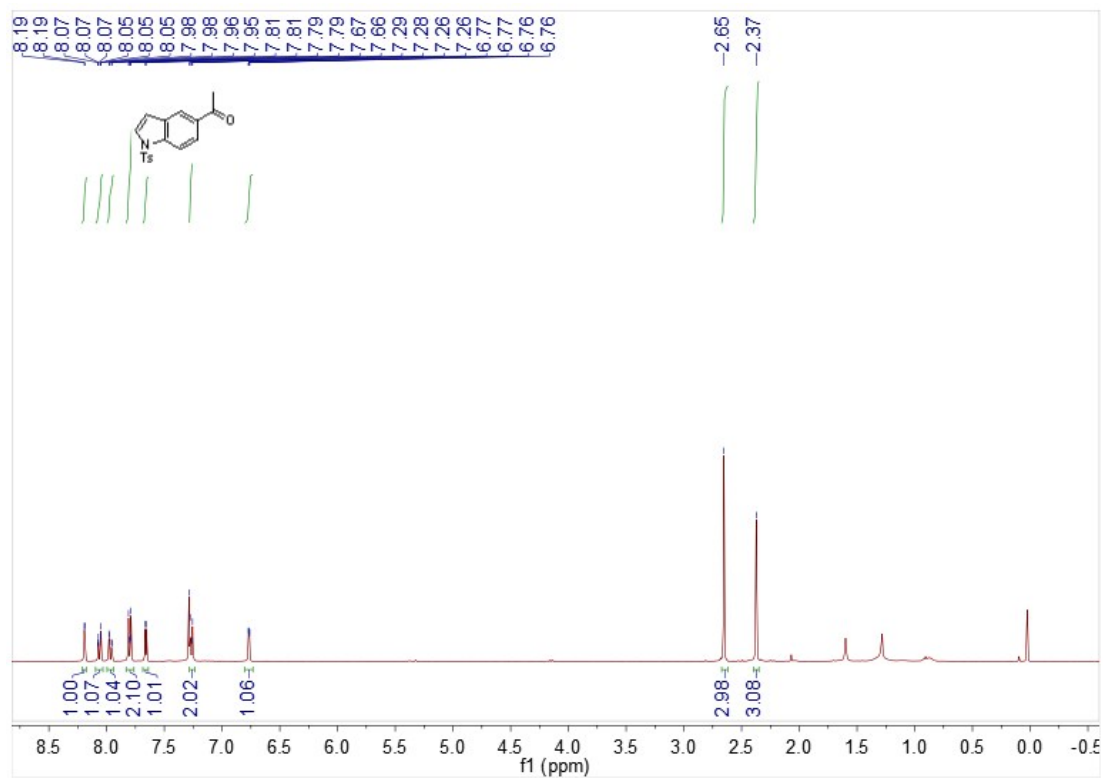

### <sup>13</sup>C NMR of compound 5

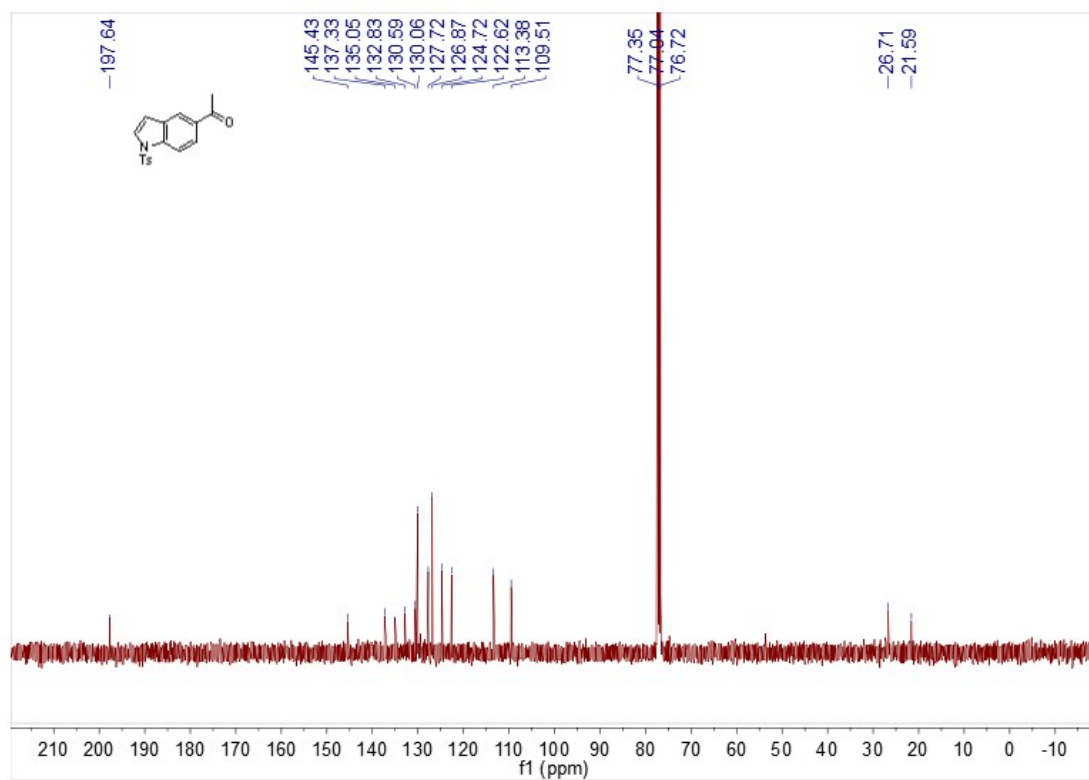

### <sup>1</sup>H NMR of compound 6

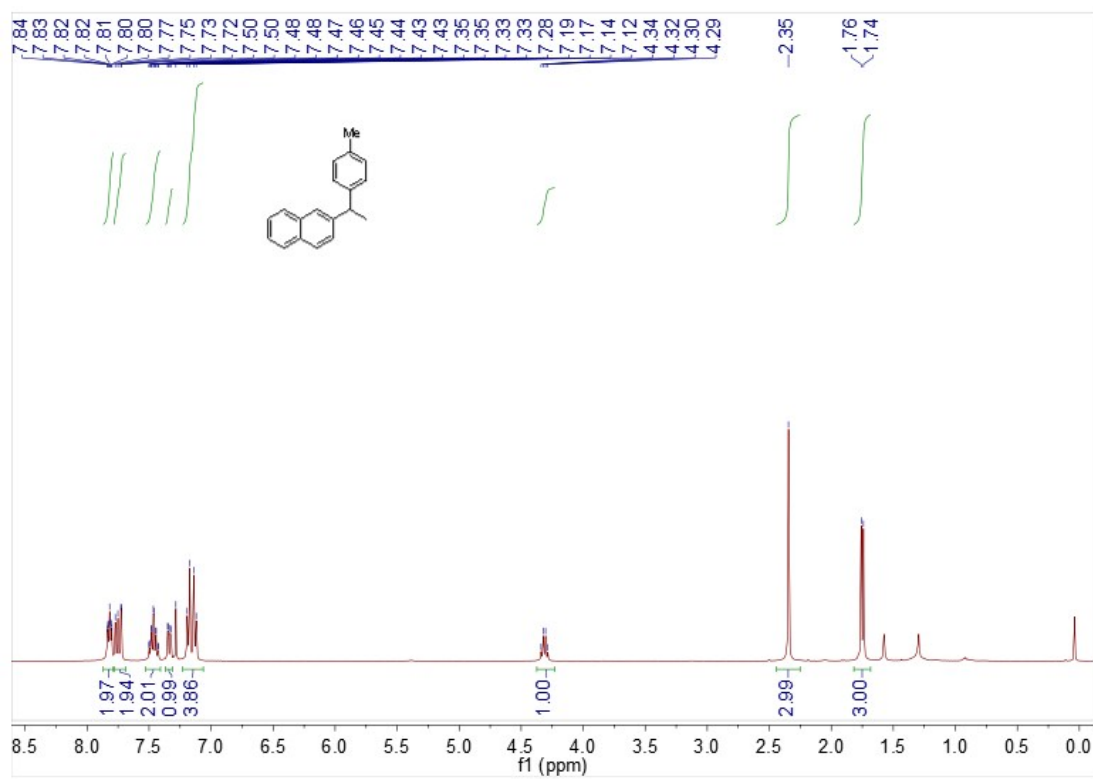

### <sup>13</sup>C NMR of compound 6

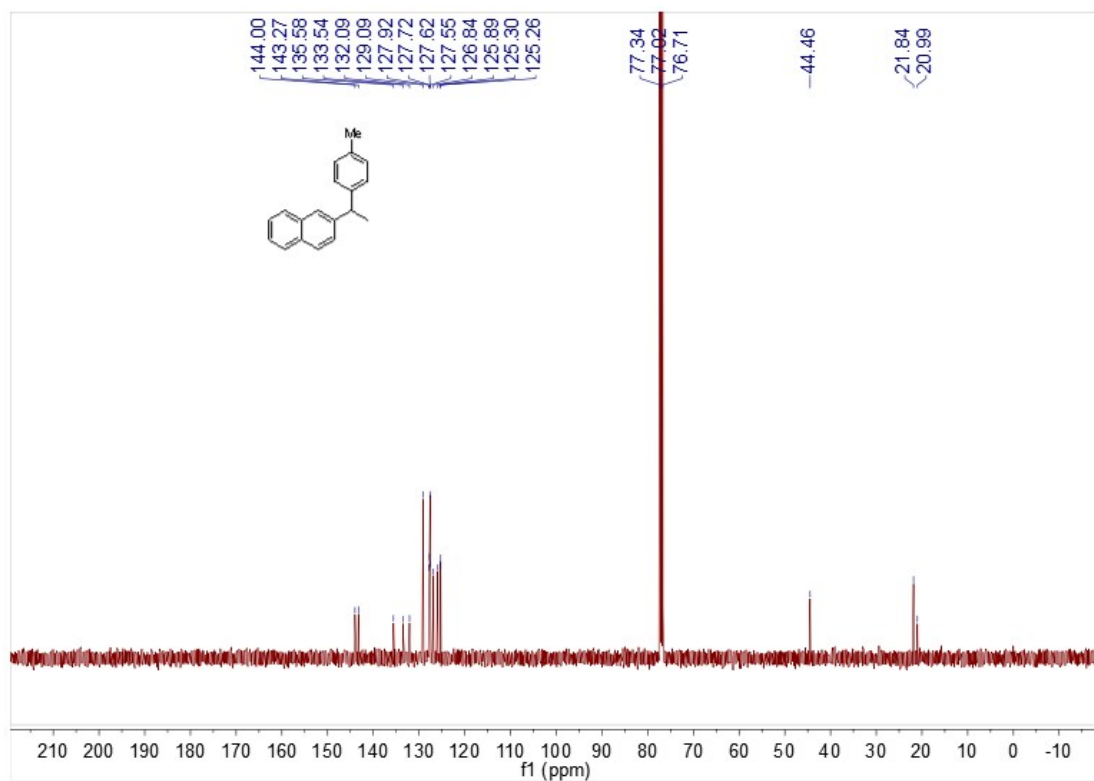

### <sup>1</sup>H NMR of compound 7

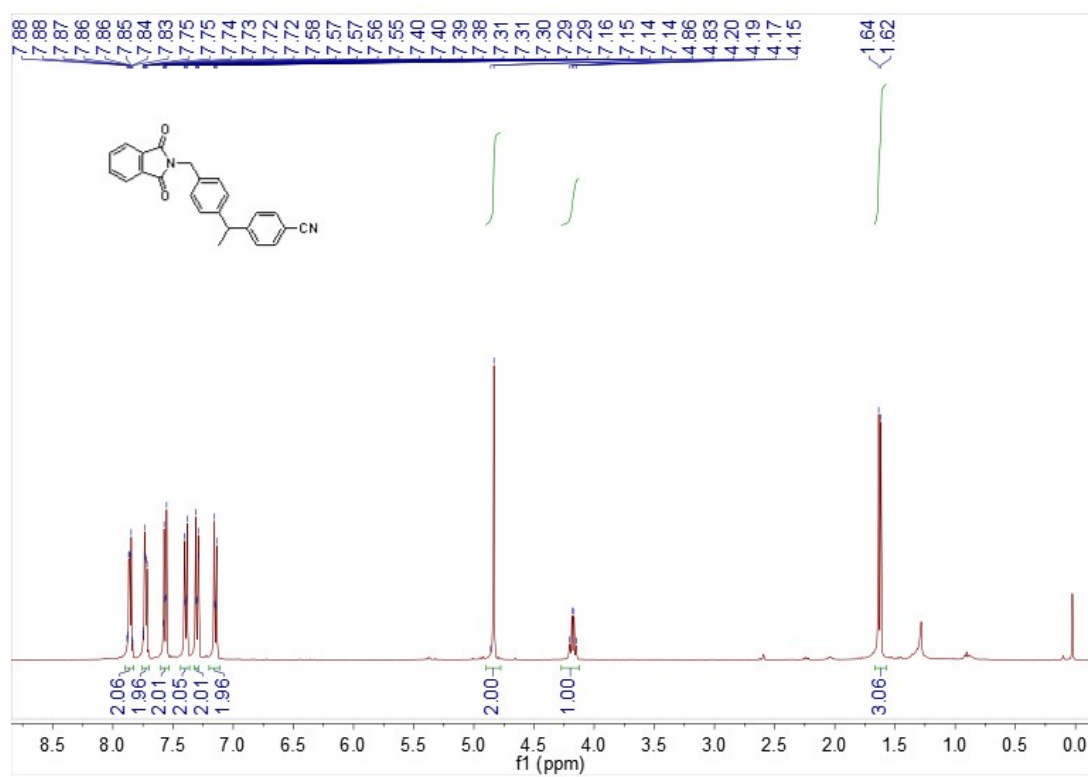

### <sup>13</sup>C NMR of compound 7

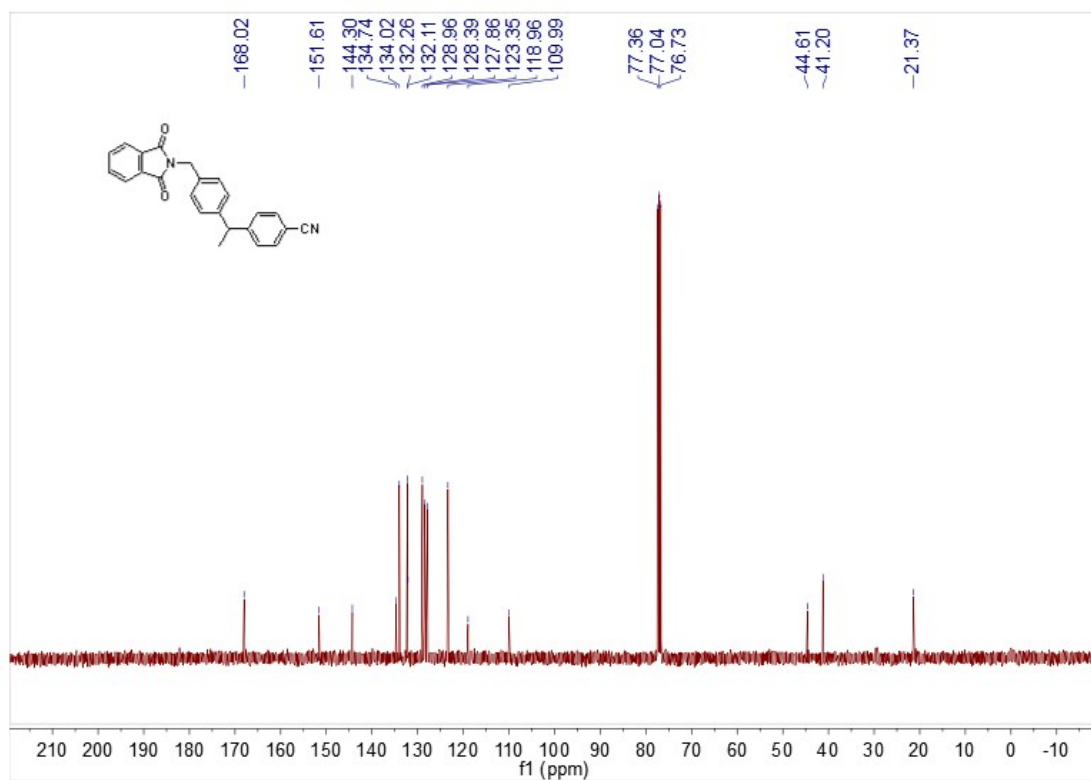

### <sup>1</sup>H NMR of compound 9

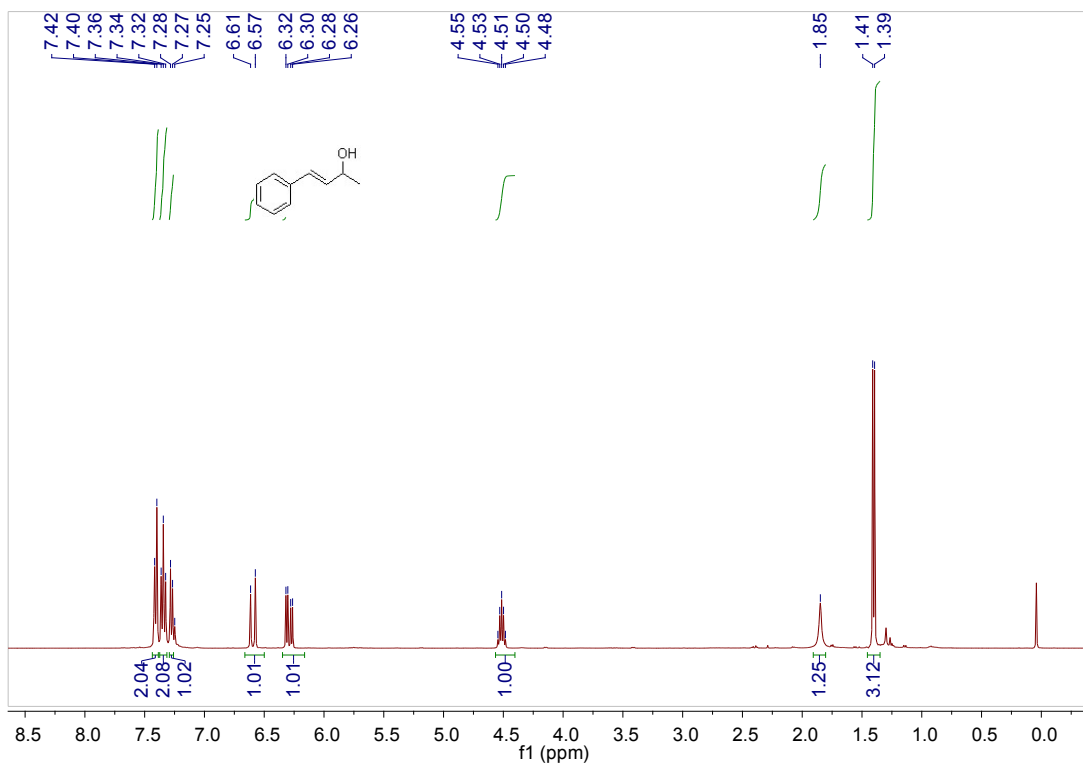



**<sup>13</sup>C NMR of compound 9**

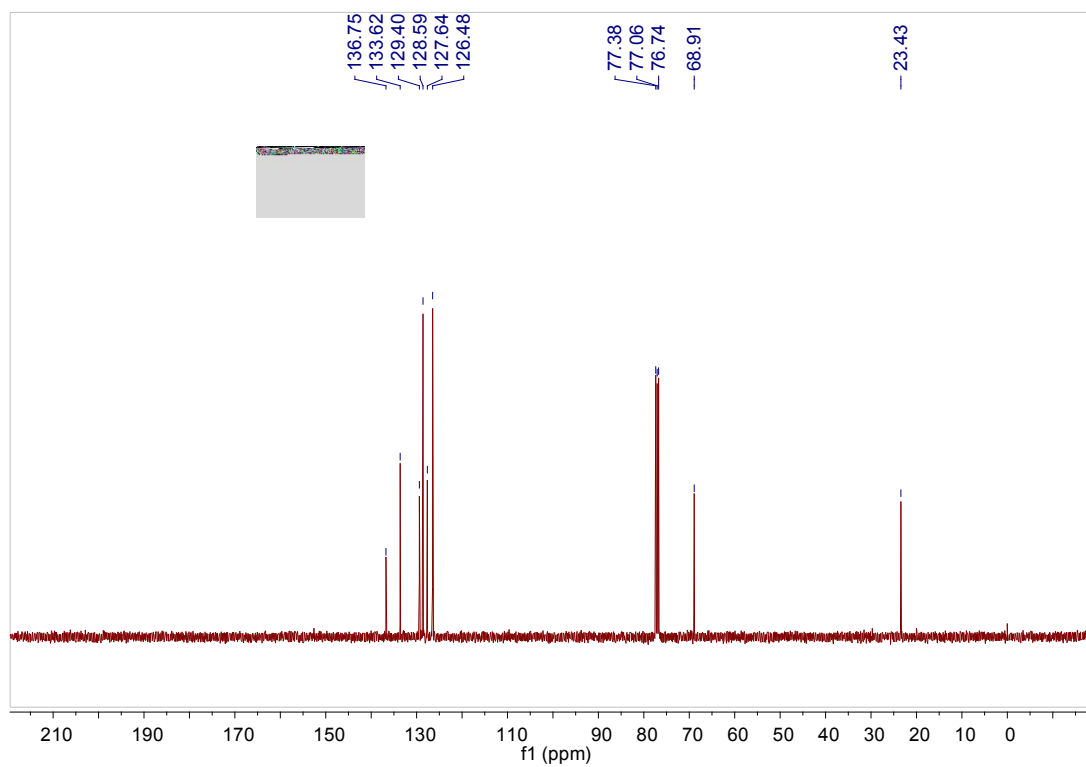

Supplement: c7cc09432a1.pdf [file c7cc09432a1.pdf]
